# Supplementary material for: The role of heterochronic gene expression and regulatory architecture in early developmental divergence
Source: eLife. 2024 Aug 23;13:RP93062. doi: 10.7554/eLife.93062 (PMC11343563; doi:10.7554/eLife.93062)
Supplement: Supplementary file 1. [file elife-93062-supp1.xlsx]

## Sheet: KEY
Key for this spreadsheet
Find the subset of results that you want to consider by selecting the tab according to the 'table of contents' below
Tab Name	Results from:	Gene subset:	Notes
Set 1	GO enrichment tests	All heterochronic genes	`weightFisher` is the p-value.
Set 2	GO enrichment tests	Heterochronic genes which are expressed earlier in PP and later in LL	`weightFisher` is the p-value.
Set 3	GO enrichment tests	Heterochronic genes which are expressed earlier in LL and later in PP	`weightFisher` is the p-value.
Set 4	GO enrichment tests	All absolute / morph-specific genes	`weightFisher` is the p-value. Not much interesting here.
Set 5	GO enrichment tests	PP-specific absolute / morph-specific genes	`weightFisher` is the p-value.
Set 6	GO enrichment tests	LL-specific absolute / morph-specific genes	`weightFisher` is the p-value. No significant enrichments.
Set 7	GO enrichment tests	PP-upregulated genes which are DE in late development (swimming or 1-week)	`weightFisher` is the p-value. Very few significant enrichments.
Set 8	GO enrichment tests	LL-upregulated genes which are DE in late development (swimming or 1-week)	`weightFisher` is the p-value. Very few significant enrichments.
Set 9	GO enrichment tests	All heteromorphic genes	`weightFisher` is the p-value.
Set 10	Selected Gene Annotations	Heterochronic genes with switch from clusters 6:1, 5:1, and 6:2 (Planktotrophic expression early compared to Lecithotrophs)

## Sheet: Set 1
GO.ID	Term	Annotated	Significant	Expected	weightFisher
GO:0035093	spermatogenesis, exchange of chromosomal...	4	2	0.06	0.0013
GO:0034587	piRNA metabolic process	4	2	0.06	0.0013
GO:0031047	gene silencing by RNA	15	3	0.23	0.0031
GO:0007568	aging	8	2	0.12	0.006
GO:0090194	negative regulation of glomerulus develo...	1	1	0.02	0.0152
GO:0072125	negative regulation of glomerular mesang...	1	1	0.02	0.0152
GO:0061149	BMP signaling pathway involved in ureter...	1	1	0.02	0.0152
GO:0061626	pharyngeal arch artery morphogenesis	1	1	0.02	0.0152
GO:0072138	mesenchymal cell proliferation involved ...	1	1	0.02	0.0152
GO:0090184	positive regulation of kidney developmen...	1	1	0.02	0.0152
GO:0048286	lung alveolus development	1	1	0.02	0.0152
GO:0072101	specification of ureteric bud anterior/p...	1	1	0.02	0.0152
GO:0006231	dTMP biosynthetic process	1	1	0.02	0.0152
GO:0006235	dTTP biosynthetic process	1	1	0.02	0.0152
GO:0007500	mesodermal cell fate determination	1	1	0.02	0.0152
GO:1901964	positive regulation of cell proliferatio...	1	1	0.02	0.0152
GO:0071893	BMP signaling pathway involved in nephri...	1	1	0.02	0.0152
GO:0007182	common-partner SMAD protein phosphorylat...	1	1	0.02	0.0152
GO:0033088	negative regulation of immature T cell p...	1	1	0.02	0.0152
GO:0060592	mammary gland formation	1	1	0.02	0.0152
GO:0033189	response to vitamin A	1	1	0.02	0.0152
GO:1990384	hyaloid vascular plexus regression	1	1	0.02	0.0152
GO:0003337	mesenchymal to epithelial transition inv...	1	1	0.02	0.0152
GO:0002043	blood vessel endothelial cell proliferat...	1	1	0.02	0.0152
GO:0060440	trachea formation	1	1	0.02	0.0152
GO:0060449	bud elongation involved in lung branchin...	1	1	0.02	0.0152
GO:0060574	intestinal epithelial cell maturation	1	1	0.02	0.0152
GO:0060433	bronchus development	1	1	0.02	0.0152
GO:0072200	negative regulation of mesenchymal cell ...	1	1	0.02	0.0152
GO:0042487	regulation of odontogenesis of dentin-co...	1	1	0.02	0.0152
GO:0070244	negative regulation of thymocyte apoptot...	1	1	0.02	0.0152
GO:0048392	intermediate mesodermal cell differentia...	1	1	0.02	0.0152
GO:0060197	cloacal septation	1	1	0.02	0.0152
GO:0060502	epithelial cell proliferation involved i...	1	1	0.02	0.0152
GO:0060503	bud dilation involved in lung branching	1	1	0.02	0.0152
GO:0006361	transcription initiation from RNA polyme...	1	1	0.02	0.0152
GO:0006363	termination of RNA polymerase I transcri...	1	1	0.02	0.0152
GO:0060684	epithelial-mesenchymal cell signaling	1	1	0.02	0.0152
GO:0060686	negative regulation of prostatic bud for...	1	1	0.02	0.0152
GO:0060687	regulation of branching involved in pros...	1	1	0.02	0.0152
GO:0042053	regulation of dopamine metabolic process	1	1	0.02	0.0152
GO:0032967	positive regulation of collagen biosynth...	1	1	0.02	0.0152
GO:2000005	negative regulation of metanephric S-sha...	1	1	0.02	0.0152
GO:2000007	negative regulation of metanephric comma...	1	1	0.02	0.0152
GO:1990519	pyrimidine nucleotide import into mitoch...	1	1	0.02	0.0152
GO:0061312	BMP signaling pathway involved in heart ...	1	1	0.02	0.0152
GO:0003163	sinoatrial node development	1	1	0.02	0.0152
GO:0021904	dorsal/ventral neural tube patterning	1	1	0.02	0.0152
GO:0060272	embryonic skeletal joint morphogenesis	1	1	0.02	0.0152
GO:0010159	specification of animal organ position	1	1	0.02	0.0152
GO:0003149	membranous septum morphogenesis	1	1	0.02	0.0152
GO:0003130	BMP signaling pathway involved in heart ...	1	1	0.02	0.0152
GO:0030302	deoxynucleotide transport	1	1	0.02	0.0152
GO:0060235	lens induction in camera-type eye	1	1	0.02	0.0152
GO:1905312	positive regulation of cardiac neural cr...	1	1	0.02	0.0152
GO:0035990	tendon cell differentiation	1	1	0.02	0.0152
GO:0035993	deltoid tuberosity development	1	1	0.02	0.0152
GO:0035999	tetrahydrofolate interconversion	1	1	0.02	0.0152
GO:0046340	diacylglycerol catabolic process	1	1	0.02	0.0152
GO:0035815	positive regulation of renal sodium excr...	1	1	0.02	0.0152
GO:0055020	positive regulation of cardiac muscle fi...	1	1	0.02	0.0152
GO:0072097	negative regulation of branch elongation...	1	1	0.02	0.0152
GO:0006000	fructose metabolic process	1	1	0.02	0.0152
GO:0006003	fructose 2,6-bisphosphate metabolic proc...	1	1	0.02	0.0152
GO:0072192	ureter epithelial cell differentiation	1	1	0.02	0.0152
GO:0072193	ureter smooth muscle cell differentiatio...	1	1	0.02	0.0152
GO:0097688	glutamate receptor clustering	1	1	0.02	0.0152
GO:0061151	BMP signaling pathway involved in renal ...	1	1	0.02	0.0152
GO:0061155	pulmonary artery endothelial tube morpho...	1	1	0.02	0.0152
GO:0072161	mesenchymal cell differentiation involve...	1	1	0.02	0.0152
GO:0019860	uracil metabolic process	1	1	0.02	0.0152
GO:0061047	positive regulation of branching involve...	1	1	0.02	0.0152
GO:0019310	inositol catabolic process	1	1	0.02	0.0152
GO:1901726	negative regulation of histone deacetyla...	1	1	0.02	0.0152
GO:0090191	negative regulation of branching involve...	1	1	0.02	0.0152
GO:0010529	negative regulation of transposition	17	2	0.26	0.0266
GO:0007589	body fluid secretion	5	2	0.08	0.0294
GO:0044805	late nucleophagy	2	1	0.03	0.0303
GO:0034720	histone H3-K4 demethylation	2	1	0.03	0.0303
GO:0051593	response to folic acid	2	1	0.03	0.0303
GO:0006283	transcription-coupled nucleotide-excisio...	2	1	0.03	0.0303
GO:0051583	dopamine uptake involved in synaptic tra...	2	1	0.03	0.0303
GO:0035116	embryonic hindlimb morphogenesis	2	1	0.03	0.0303
GO:0051150	regulation of smooth muscle cell differe...	2	1	0.03	0.0303
GO:0072205	metanephric collecting duct development	2	1	0.03	0.0303
GO:0042420	dopamine catabolic process	2	1	0.03	0.0303
GO:0045843	negative regulation of striated muscle t...	2	1	0.03	0.0303
GO:0048311	mitochondrion distribution	2	1	0.03	0.0303
GO:0060134	prepulse inhibition	2	1	0.03	0.0303
GO:0006844	acyl carnitine transport	2	1	0.03	0.0303
GO:0032331	negative regulation of chondrocyte diffe...	2	1	0.03	0.0303
GO:0021984	adenohypophysis development	2	1	0.03	0.0303
GO:2000137	negative regulation of cell proliferatio...	2	1	0.03	0.0303
GO:0042136	neurotransmitter biosynthetic process	2	1	0.03	0.0303
GO:0018095	protein polyglutamylation	2	1	0.03	0.0303
GO:0045669	positive regulation of osteoblast differ...	2	1	0.03	0.0303
GO:0046485	ether lipid metabolic process	2	1	0.03	0.0303
GO:0045603	positive regulation of endothelial cell ...	2	1	0.03	0.0303
GO:0045606	positive regulation of epidermal cell di...	2	1	0.03	0.0303
GO:1903800	positive regulation of production of miR...	2	1	0.03	0.0303
GO:0061036	positive regulation of cartilage develop...	2	1	0.03	0.0303
GO:0060363	cranial suture morphogenesis	2	1	0.03	0.0303
GO:0006417	regulation of translation	38	3	0.58	0.0346
GO:0045471	response to ethanol	28	3	0.43	0.0375
GO:0007275	multicellular organism development	518	8	7.9	0.0404
GO:0051216	cartilage development	7	2	0.11	0.0438
GO:0002576	platelet degranulation	3	1	0.05	0.0451
GO:0019433	triglyceride catabolic process	3	1	0.05	0.0451
GO:0003323	type B pancreatic cell development	3	1	0.05	0.0451
GO:0030224	monocyte differentiation	3	1	0.05	0.0451
GO:0030225	macrophage differentiation	3	1	0.05	0.0451
GO:0010862	positive regulation of pathway-restricte...	3	1	0.05	0.0451
GO:0034497	protein localization to phagophore assem...	3	1	0.05	0.0451
GO:0007608	sensory perception of smell	3	1	0.05	0.0451
GO:0006390	mitochondrial transcription	3	1	0.05	0.0451
GO:0042416	dopamine biosynthetic process	3	1	0.05	0.0451
GO:0015874	norepinephrine transport	3	1	0.05	0.0451
GO:0010453	regulation of cell fate commitment	3	1	0.05	0.0451
GO:0021978	telencephalon regionalization	3	1	0.05	0.0451
GO:0001958	endochondral ossification	3	1	0.05	0.0451
GO:0003180	aortic valve morphogenesis	3	1	0.05	0.0451
GO:0097421	liver regeneration	3	1	0.05	0.0451
GO:0040018	positive regulation of multicellular org...	3	1	0.05	0.0451
GO:0035810	positive regulation of urine volume	3	1	0.05	0.0451
GO:0042220	response to cocaine	3	1	0.05	0.0451
GO:0045662	negative regulation of myoblast differen...	3	1	0.05	0.0451
GO:0002320	lymphoid progenitor cell differentiation	3	1	0.05	0.0451
GO:0060391	positive regulation of SMAD protein sign...	3	1	0.05	0.0451
GO:0030501	positive regulation of bone mineralizati...	3	1	0.05	0.0451
GO:0007595	lactation	3	1	0.05	0.0451
GO:0021983	pituitary gland development	6	2	0.09	0.0579
GO:0042733	embryonic digit morphogenesis	4	1	0.06	0.0596
GO:0019048	modulation by virus of host process	4	1	0.06	0.0596
GO:0045324	late endosome to vacuole transport	4	1	0.06	0.0596
GO:0010499	proteasomal ubiquitin-independent protei...	4	1	0.06	0.0596
GO:0045332	phospholipid translocation	4	1	0.06	0.0596
GO:1902894	negative regulation of miRNA transcripti...	4	1	0.06	0.0596
GO:0036158	outer dynein arm assembly	4	1	0.06	0.0596
GO:0003197	endocardial cushion development	4	1	0.06	0.0596
GO:0032922	circadian regulation of gene expression	4	1	0.06	0.0596
GO:0003139	secondary heart field specification	4	1	0.06	0.0596
GO:0010039	response to iron ion	4	1	0.06	0.0596
GO:0043407	negative regulation of MAP kinase activi...	4	1	0.06	0.0596
GO:0043114	regulation of vascular permeability	4	1	0.06	0.0596
GO:0042417	dopamine metabolic process	9	2	0.14	0.0719
GO:0060012	synaptic transmission, glycinergic	5	1	0.08	0.074
GO:0000132	establishment of mitotic spindle orienta...	5	1	0.08	0.074
GO:0045839	negative regulation of mitotic nuclear d...	5	1	0.08	0.074
GO:0006414	translational elongation	5	1	0.08	0.074
GO:0032570	response to progesterone	5	1	0.08	0.074
GO:0009948	anterior/posterior axis specification	5	1	0.08	0.074
GO:0045666	positive regulation of neuron differenti...	5	1	0.08	0.074
GO:0032509	endosome transport via multivesicular bo...	5	1	0.08	0.074
GO:0010753	positive regulation of cGMP-mediated sig...	6	1	0.09	0.0881
GO:0072104	glomerular capillary formation	6	1	0.09	0.0881
GO:2000300	regulation of synaptic vesicle exocytosi...	6	1	0.09	0.0881
GO:0060113	inner ear receptor cell differentiation	6	1	0.09	0.0881
GO:0001938	positive regulation of endothelial cell ...	6	1	0.09	0.0881
GO:1903779	regulation of cardiac conduction	6	1	0.09	0.0881
GO:0003148	outflow tract septum morphogenesis	6	1	0.09	0.0881
GO:0032092	positive regulation of protein binding	6	1	0.09	0.0881
GO:0048662	negative regulation of smooth muscle cel...	6	1	0.09	0.0881
GO:0072015	glomerular visceral epithelial cell deve...	6	1	0.09	0.0881
GO:0000398	mRNA splicing, via spliceosome	33	2	0.5	0.0887
GO:0006338	chromatin remodeling	20	3	0.3	0.0967
GO:0003014	renal system process	12	2	0.18	0.0993
GO:0007168	receptor guanylyl cyclase signaling path...	7	1	0.11	0.1021
GO:0071361	cellular response to ethanol	7	1	0.11	0.1021
GO:0000422	autophagy of mitochondrion	7	1	0.11	0.1021
GO:0042306	regulation of protein import into nucleu...	7	1	0.11	0.1021
GO:0048701	embryonic cranial skeleton morphogenesis	7	1	0.11	0.1021
GO:0003184	pulmonary valve morphogenesis	7	1	0.11	0.1021
GO:1902476	chloride transmembrane transport	7	1	0.11	0.1021
GO:0060236	regulation of mitotic spindle organizati...	7	1	0.11	0.1021
GO:0006182	cGMP biosynthetic process	7	1	0.11	0.1021
GO:0051384	response to glucocorticoid	7	1	0.11	0.1021
GO:0048661	positive regulation of smooth muscle cel...	7	1	0.11	0.1021
GO:0051321	meiotic cell cycle	38	2	0.58	0.1128
GO:0060976	coronary vasculature development	8	1	0.12	0.1158
GO:0010718	positive regulation of epithelial to mes...	8	1	0.12	0.1158
GO:0030218	erythrocyte differentiation	8	1	0.12	0.1158
GO:2001237	negative regulation of extrinsic apoptot...	8	1	0.12	0.1158
GO:0071230	cellular response to amino acid stimulus	8	1	0.12	0.1158
GO:0035094	response to nicotine	9	1	0.14	0.1293
GO:0007586	digestion	9	1	0.14	0.1293
GO:0097746	blood vessel diameter maintenance	9	1	0.14	0.1293
GO:0007218	neuropeptide signaling pathway	9	1	0.14	0.1293
GO:0031122	cytoplasmic microtubule organization	9	1	0.14	0.1293
GO:0030513	positive regulation of BMP signaling pat...	9	1	0.14	0.1293
GO:0051591	response to cAMP	10	1	0.15	0.1427
GO:0006890	retrograde vesicle-mediated transport, G...	10	1	0.15	0.1427
GO:0001843	neural tube closure	10	1	0.15	0.1427
GO:0008217	regulation of blood pressure	10	1	0.15	0.1427
GO:0043687	post-translational protein modification	10	1	0.15	0.1427
GO:0016525	negative regulation of angiogenesis	10	1	0.15	0.1427
GO:0048663	neuron fate commitment	11	1	0.17	0.1558
GO:0008584	male gonad development	12	1	0.18	0.1687
GO:0036065	fucosylation	12	1	0.18	0.1687
GO:0030308	negative regulation of cell growth	12	1	0.18	0.1687
GO:0050680	negative regulation of epithelial cell p...	12	1	0.18	0.1687
GO:0015031	protein transport	157	4	2.39	0.1779
GO:0007492	endoderm development	13	1	0.2	0.1815
GO:0015074	DNA integration	150	4	2.29	0.1913
GO:0043401	steroid hormone mediated signaling pathw...	14	1	0.21	0.194
GO:0048589	developmental growth	72	3	1.1	0.1999
GO:0051260	protein homooligomerization	15	1	0.23	0.2064
GO:0008203	cholesterol metabolic process	16	1	0.24	0.2186
GO:0051090	regulation of DNA-binding transcription ...	17	1	0.26	0.2306
GO:0070374	positive regulation of ERK1 and ERK2 cas...	17	1	0.26	0.2306
GO:0007623	circadian rhythm	22	2	0.34	0.2363
GO:0017148	negative regulation of translation	18	1	0.27	0.2424
GO:0071294	cellular response to zinc ion	18	1	0.27	0.2424
GO:0043161	proteasome-mediated ubiquitin-dependent ...	63	2	0.96	0.2492
GO:0043523	regulation of neuron apoptotic process	19	1	0.29	0.254
GO:0009636	response to toxic substance	20	1	0.3	0.2655
GO:0045893	positive regulation of transcription, DN...	83	2	1.27	0.2764
GO:0006865	amino acid transport	21	1	0.32	0.2768
GO:0010595	positive regulation of endothelial cell ...	22	1	0.34	0.2879
GO:0006412	translation	67	5	1.02	0.302
GO:0007626	locomotory behavior	24	1	0.37	0.3097
GO:0045333	cellular respiration	24	1	0.37	0.3097
GO:0090316	positive regulation of intracellular pro...	24	1	0.37	0.3097
GO:0009791	post-embryonic development	25	1	0.38	0.3203
GO:0035725	sodium ion transmembrane transport	25	1	0.38	0.3203
GO:0007281	germ cell development	44	3	0.67	0.3643
GO:0032259	methylation	31	1	0.47	0.3809
GO:0000209	protein polyubiquitination	34	1	0.52	0.4092
GO:0007264	small GTPase mediated signal transductio...	35	1	0.53	0.4184
GO:0050877	nervous system process	96	2	1.46	0.4848
GO:0040011	locomotion	164	2	2.5	0.4882
GO:0043065	positive regulation of apoptotic process	44	1	0.67	0.4947

## Sheet: Set 2
GO.ID	Term	Annotated	Significant	Expected	weightFisher
GO:0034587	piRNA metabolic process	4	2	0.04	0.00043
GO:0035093	spermatogenesis, exchange of chromosomal...	4	2	0.04	0.00043
GO:0031047	gene silencing by RNA	15	3	0.13	0.00097
GO:0072101	specification of ureteric bud anterior/p...	1	1	0.01	0.00878
GO:0061312	BMP signaling pathway involved in heart ...	1	1	0.01	0.00878
GO:0002043	blood vessel endothelial cell proliferat...	1	1	0.01	0.00878
GO:1901964	positive regulation of cell proliferatio...	1	1	0.01	0.00878
GO:0021904	dorsal/ventral neural tube patterning	1	1	0.01	0.00878
GO:0048392	intermediate mesodermal cell differentia...	1	1	0.01	0.00878
GO:0030302	deoxynucleotide transport	1	1	0.01	0.00878
GO:0033088	negative regulation of immature T cell p...	1	1	0.01	0.00878
GO:1990384	hyaloid vascular plexus regression	1	1	0.01	0.00878
GO:0035990	tendon cell differentiation	1	1	0.01	0.00878
GO:0007182	common-partner SMAD protein phosphorylat...	1	1	0.01	0.00878
GO:0035993	deltoid tuberosity development	1	1	0.01	0.00878
GO:0003163	sinoatrial node development	1	1	0.01	0.00878
GO:0072200	negative regulation of mesenchymal cell ...	1	1	0.01	0.00878
GO:0061047	positive regulation of branching involve...	1	1	0.01	0.00878
GO:0007500	mesodermal cell fate determination	1	1	0.01	0.00878
GO:0003149	membranous septum morphogenesis	1	1	0.01	0.00878
GO:0070244	negative regulation of thymocyte apoptot...	1	1	0.01	0.00878
GO:0032967	positive regulation of collagen biosynth...	1	1	0.01	0.00878
GO:0003130	BMP signaling pathway involved in heart ...	1	1	0.01	0.00878
GO:2000005	negative regulation of metanephric S-sha...	1	1	0.01	0.00878
GO:2000007	negative regulation of metanephric comma...	1	1	0.01	0.00878
GO:0060440	trachea formation	1	1	0.01	0.00878
GO:0042053	regulation of dopamine metabolic process	1	1	0.01	0.00878
GO:0061151	BMP signaling pathway involved in renal ...	1	1	0.01	0.00878
GO:0060449	bud elongation involved in lung branchin...	1	1	0.01	0.00878
GO:0061155	pulmonary artery endothelial tube morpho...	1	1	0.01	0.00878
GO:0060433	bronchus development	1	1	0.01	0.00878
GO:0042487	regulation of odontogenesis of dentin-co...	1	1	0.01	0.00878
GO:0071893	BMP signaling pathway involved in nephri...	1	1	0.01	0.00878
GO:0061149	BMP signaling pathway involved in ureter...	1	1	0.01	0.00878
GO:0072097	negative regulation of branch elongation...	1	1	0.01	0.00878
GO:1905312	positive regulation of cardiac neural cr...	1	1	0.01	0.00878
GO:0060197	cloacal septation	1	1	0.01	0.00878
GO:0060592	mammary gland formation	1	1	0.01	0.00878
GO:1901726	negative regulation of histone deacetyla...	1	1	0.01	0.00878
GO:0090191	negative regulation of branching involve...	1	1	0.01	0.00878
GO:0090194	negative regulation of glomerulus develo...	1	1	0.01	0.00878
GO:1990519	pyrimidine nucleotide import into mitoch...	1	1	0.01	0.00878
GO:0010159	specification of animal organ position	1	1	0.01	0.00878
GO:0090184	positive regulation of kidney developmen...	1	1	0.01	0.00878
GO:0061626	pharyngeal arch artery morphogenesis	1	1	0.01	0.00878
GO:0060502	epithelial cell proliferation involved i...	1	1	0.01	0.00878
GO:0060503	bud dilation involved in lung branching	1	1	0.01	0.00878
GO:0055020	positive regulation of cardiac muscle fi...	1	1	0.01	0.00878
GO:0072192	ureter epithelial cell differentiation	1	1	0.01	0.00878
GO:0072193	ureter smooth muscle cell differentiatio...	1	1	0.01	0.00878
GO:0003337	mesenchymal to epithelial transition inv...	1	1	0.01	0.00878
GO:0072161	mesenchymal cell differentiation involve...	1	1	0.01	0.00878
GO:0060684	epithelial-mesenchymal cell signaling	1	1	0.01	0.00878
GO:0060686	negative regulation of prostatic bud for...	1	1	0.01	0.00878
GO:0060687	regulation of branching involved in pros...	1	1	0.01	0.00878
GO:0060272	embryonic skeletal joint morphogenesis	1	1	0.01	0.00878
GO:0072125	negative regulation of glomerular mesang...	1	1	0.01	0.00878
GO:0048286	lung alveolus development	1	1	0.01	0.00878
GO:0072138	mesenchymal cell proliferation involved ...	1	1	0.01	0.00878
GO:0060235	lens induction in camera-type eye	1	1	0.01	0.00878
GO:0010529	negative regulation of transposition	17	2	0.15	0.00918
GO:0045603	positive regulation of endothelial cell ...	2	1	0.02	0.01748
GO:0045606	positive regulation of epidermal cell di...	2	1	0.02	0.01748
GO:1903800	positive regulation of production of miR...	2	1	0.02	0.01748
GO:0051150	regulation of smooth muscle cell differe...	2	1	0.02	0.01748
GO:0051583	dopamine uptake involved in synaptic tra...	2	1	0.02	0.01748
GO:0060363	cranial suture morphogenesis	2	1	0.02	0.01748
GO:0018095	protein polyglutamylation	2	1	0.02	0.01748
GO:0048311	mitochondrion distribution	2	1	0.02	0.01748
GO:0072205	metanephric collecting duct development	2	1	0.02	0.01748
GO:0035116	embryonic hindlimb morphogenesis	2	1	0.02	0.01748
GO:0061036	positive regulation of cartilage develop...	2	1	0.02	0.01748
GO:0006283	transcription-coupled nucleotide-excisio...	2	1	0.02	0.01748
GO:0045843	negative regulation of striated muscle t...	2	1	0.02	0.01748
GO:0042420	dopamine catabolic process	2	1	0.02	0.01748
GO:2000137	negative regulation of cell proliferatio...	2	1	0.02	0.01748
GO:0060134	prepulse inhibition	2	1	0.02	0.01748
GO:0042136	neurotransmitter biosynthetic process	2	1	0.02	0.01748
GO:0045669	positive regulation of osteoblast differ...	2	1	0.02	0.01748
GO:0032331	negative regulation of chondrocyte diffe...	2	1	0.02	0.01748
GO:0034720	histone H3-K4 demethylation	2	1	0.02	0.01748
GO:0021984	adenohypophysis development	2	1	0.02	0.01748
GO:0021978	telencephalon regionalization	3	1	0.03	0.02611
GO:0042220	response to cocaine	3	1	0.03	0.02611
GO:0060391	positive regulation of SMAD protein sign...	3	1	0.03	0.02611
GO:0007595	lactation	3	1	0.03	0.02611
GO:0001958	endochondral ossification	3	1	0.03	0.02611
GO:0015874	norepinephrine transport	3	1	0.03	0.02611
GO:0003180	aortic valve morphogenesis	3	1	0.03	0.02611
GO:0002576	platelet degranulation	3	1	0.03	0.02611
GO:0010862	positive regulation of pathway-restricte...	3	1	0.03	0.02611
GO:0010453	regulation of cell fate commitment	3	1	0.03	0.02611
GO:0042416	dopamine biosynthetic process	3	1	0.03	0.02611
GO:0007608	sensory perception of smell	3	1	0.03	0.02611
GO:0006390	mitochondrial transcription	3	1	0.03	0.02611
GO:0030501	positive regulation of bone mineralizati...	3	1	0.03	0.02611
GO:0040018	positive regulation of multicellular org...	3	1	0.03	0.02611
GO:0002320	lymphoid progenitor cell differentiation	3	1	0.03	0.02611
GO:0030224	monocyte differentiation	3	1	0.03	0.02611
GO:0030225	macrophage differentiation	3	1	0.03	0.02611
GO:0003323	type B pancreatic cell development	3	1	0.03	0.02611
GO:0045662	negative regulation of myoblast differen...	3	1	0.03	0.02611
GO:0000398	mRNA splicing, via spliceosome	33	2	0.29	0.03278
GO:0021983	pituitary gland development	6	2	0.05	0.0329
GO:0045324	late endosome to vacuole transport	4	1	0.04	0.03467
GO:0045332	phospholipid translocation	4	1	0.04	0.03467
GO:0003197	endocardial cushion development	4	1	0.04	0.03467
GO:0036158	outer dynein arm assembly	4	1	0.04	0.03467
GO:0042733	embryonic digit morphogenesis	4	1	0.04	0.03467
GO:0003139	secondary heart field specification	4	1	0.04	0.03467
GO:0032922	circadian regulation of gene expression	4	1	0.04	0.03467
GO:0010499	proteasomal ubiquitin-independent protei...	4	1	0.04	0.03467
GO:0010039	response to iron ion	4	1	0.04	0.03467
GO:0043407	negative regulation of MAP kinase activi...	4	1	0.04	0.03467
GO:1902894	negative regulation of miRNA transcripti...	4	1	0.04	0.03467
GO:0051321	meiotic cell cycle	38	2	0.33	0.04252
GO:0006417	regulation of translation	38	2	0.33	0.04252
GO:0009948	anterior/posterior axis specification	5	1	0.04	0.04316
GO:0045839	negative regulation of mitotic nuclear d...	5	1	0.04	0.04316
GO:0000132	establishment of mitotic spindle orienta...	5	1	0.04	0.04316
GO:0032509	endosome transport via multivesicular bo...	5	1	0.04	0.04316
GO:0045666	positive regulation of neuron differenti...	5	1	0.04	0.04316
GO:0006414	translational elongation	5	1	0.04	0.04316
GO:0072104	glomerular capillary formation	6	1	0.05	0.05157
GO:0032092	positive regulation of protein binding	6	1	0.05	0.05157
GO:0001938	positive regulation of endothelial cell ...	6	1	0.05	0.05157
GO:0003148	outflow tract septum morphogenesis	6	1	0.05	0.05157
GO:0072015	glomerular visceral epithelial cell deve...	6	1	0.05	0.05157
GO:0060113	inner ear receptor cell differentiation	6	1	0.05	0.05157
GO:0006338	chromatin remodeling	20	3	0.18	0.05408
GO:0060236	regulation of mitotic spindle organizati...	7	1	0.06	0.05992
GO:0003184	pulmonary valve morphogenesis	7	1	0.06	0.05992
GO:0048701	embryonic cranial skeleton morphogenesis	7	1	0.06	0.05992
GO:0042306	regulation of protein import into nucleu...	7	1	0.06	0.05992
GO:0048661	positive regulation of smooth muscle cel...	7	1	0.06	0.05992
GO:0007568	aging	8	1	0.07	0.0682
GO:0010718	positive regulation of epithelial to mes...	8	1	0.07	0.0682
GO:0060976	coronary vasculature development	8	1	0.07	0.0682
GO:2001237	negative regulation of extrinsic apoptot...	8	1	0.07	0.0682
GO:0030218	erythrocyte differentiation	8	1	0.07	0.0682
GO:0007275	multicellular organism development	518	5	4.55	0.07064
GO:0031122	cytoplasmic microtubule organization	9	1	0.08	0.0764
GO:0030513	positive regulation of BMP signaling pat...	9	1	0.08	0.0764
GO:0035094	response to nicotine	9	1	0.08	0.0764
GO:0043687	post-translational protein modification	10	1	0.09	0.08454
GO:0051591	response to cAMP	10	1	0.09	0.08454
GO:0001843	neural tube closure	10	1	0.09	0.08454
GO:0006890	retrograde vesicle-mediated transport, G...	10	1	0.09	0.08454
GO:0048663	neuron fate commitment	11	1	0.1	0.09261
GO:0003014	renal system process	12	1	0.11	0.10062
GO:0008584	male gonad development	12	1	0.11	0.10062
GO:0050680	negative regulation of epithelial cell p...	12	1	0.11	0.10062
GO:0043161	proteasome-mediated ubiquitin-dependent ...	63	2	0.55	0.10382
GO:0007492	endoderm development	13	1	0.11	0.10856
GO:0043401	steroid hormone mediated signaling pathw...	14	1	0.12	0.11643
GO:0070374	positive regulation of ERK1 and ERK2 cas...	17	1	0.15	0.13964
GO:0051090	regulation of DNA-binding transcription ...	17	1	0.15	0.13964
GO:0043523	regulation of neuron apoptotic process	19	1	0.17	0.1548
GO:0045893	positive regulation of transcription, DN...	83	2	0.73	0.16589
GO:0010595	positive regulation of endothelial cell ...	22	1	0.19	0.17706
GO:0006412	translation	67	4	0.59	0.17944
GO:0045333	cellular respiration	24	1	0.21	0.19159
GO:0090316	positive regulation of intracellular pro...	24	1	0.21	0.19159
GO:0007626	locomotory behavior	24	1	0.21	0.19159
GO:0009791	post-embryonic development	25	1	0.22	0.19877
GO:0035725	sodium ion transmembrane transport	25	1	0.22	0.19877
GO:0007281	germ cell development	44	3	0.39	0.21933
GO:0045471	response to ethanol	28	1	0.25	0.21993
GO:0000209	protein polyubiquitination	34	1	0.3	0.26068
GO:0000122	negative regulation of transcription by ...	125	2	1.1	0.30091
GO:0040011	locomotion	164	2	1.44	0.31304
GO:0043065	positive regulation of apoptotic process	44	1	0.39	0.32414
GO:0015031	protein transport	157	3	1.38	0.34823
GO:0015074	DNA integration	150	2	1.32	0.38333
GO:0006897	endocytosis	60	1	0.53	0.41507
GO:0007283	spermatogenesis	80	3	0.7	0.41709
GO:0045944	positive regulation of transcription by ...	62	1	0.54	0.42558

## Sheet: Set 3
GO.ID	Term	Annotated	Significant	Expected	weightFisher
GO:0035999	tetrahydrofolate interconversion	1	1	0.01	0.0065
GO:0006361	transcription initiation from RNA polyme...	1	1	0.01	0.0065
GO:0006363	termination of RNA polymerase I transcri...	1	1	0.01	0.0065
GO:0033189	response to vitamin A	1	1	0.01	0.0065
GO:0035815	positive regulation of renal sodium excr...	1	1	0.01	0.0065
GO:0006231	dTMP biosynthetic process	1	1	0.01	0.0065
GO:0006235	dTTP biosynthetic process	1	1	0.01	0.0065
GO:0019860	uracil metabolic process	1	1	0.01	0.0065
GO:0097688	glutamate receptor clustering	1	1	0.01	0.0065
GO:0019310	inositol catabolic process	1	1	0.01	0.0065
GO:0006000	fructose metabolic process	1	1	0.01	0.0065
GO:0006003	fructose 2,6-bisphosphate metabolic proc...	1	1	0.01	0.0065
GO:0060574	intestinal epithelial cell maturation	1	1	0.01	0.0065
GO:0046340	diacylglycerol catabolic process	1	1	0.01	0.0065
GO:0044805	late nucleophagy	2	1	0.01	0.0129
GO:0046485	ether lipid metabolic process	2	1	0.01	0.0129
GO:0006844	acyl carnitine transport	2	1	0.01	0.0129
GO:0051593	response to folic acid	2	1	0.01	0.0129
GO:0019433	triglyceride catabolic process	3	1	0.02	0.0193
GO:0035810	positive regulation of urine volume	3	1	0.02	0.0193
GO:0034497	protein localization to phagophore assem...	3	1	0.02	0.0193
GO:0097421	liver regeneration	3	1	0.02	0.0193
GO:0043114	regulation of vascular permeability	4	1	0.03	0.0256
GO:0019048	modulation by virus of host process	4	1	0.03	0.0256
GO:0060012	synaptic transmission, glycinergic	5	1	0.03	0.0319
GO:0032570	response to progesterone	5	1	0.03	0.0319
GO:0007589	body fluid secretion	5	1	0.03	0.0319
GO:0048662	negative regulation of smooth muscle cel...	6	1	0.04	0.0382
GO:1903779	regulation of cardiac conduction	6	1	0.04	0.0382
GO:2000300	regulation of synaptic vesicle exocytosi...	6	1	0.04	0.0382
GO:0010753	positive regulation of cGMP-mediated sig...	6	1	0.04	0.0382
GO:0071361	cellular response to ethanol	7	1	0.05	0.0445
GO:0007168	receptor guanylyl cyclase signaling path...	7	1	0.05	0.0445
GO:0051216	cartilage development	7	1	0.05	0.0445
GO:0051384	response to glucocorticoid	7	1	0.05	0.0445
GO:1902476	chloride transmembrane transport	7	1	0.05	0.0445
GO:0006182	cGMP biosynthetic process	7	1	0.05	0.0445
GO:0000422	autophagy of mitochondrion	7	1	0.05	0.0445
GO:0071230	cellular response to amino acid stimulus	8	1	0.05	0.0507
GO:0007568	aging	8	1	0.05	0.0507
GO:0007218	neuropeptide signaling pathway	9	1	0.06	0.0568
GO:0042417	dopamine metabolic process	9	1	0.06	0.0568
GO:0097746	blood vessel diameter maintenance	9	1	0.06	0.0568
GO:0007586	digestion	9	1	0.06	0.0568
GO:0016525	negative regulation of angiogenesis	10	1	0.06	0.0629
GO:0008217	regulation of blood pressure	10	1	0.06	0.0629
GO:0036065	fucosylation	12	1	0.08	0.0751
GO:0030308	negative regulation of cell growth	12	1	0.08	0.0751
GO:0051260	protein homooligomerization	15	1	0.1	0.093
GO:0008203	cholesterol metabolic process	16	1	0.1	0.0989
GO:0017148	negative regulation of translation	18	1	0.12	0.1106
GO:0071294	cellular response to zinc ion	18	1	0.12	0.1106
GO:0045471	response to ethanol	28	2	0.18	0.1197
GO:0009636	response to toxic substance	20	1	0.13	0.1222
GO:0006865	amino acid transport	21	1	0.14	0.1279
GO:0007623	circadian rhythm	22	1	0.14	0.1336
GO:0032259	methylation	31	1	0.2	0.1833
GO:0007264	small GTPase mediated signal transductio...	35	1	0.23	0.2046
GO:0015074	DNA integration	150	2	0.97	0.2525
GO:0034097	response to cytokine	50	1	0.32	0.2797
GO:0042391	regulation of membrane potential	57	1	0.37	0.3125
GO:0006486	protein glycosylation	71	1	0.46	0.3739
GO:0048589	developmental growth	72	1	0.47	0.3781
GO:0007275	multicellular organism development	518	3	3.35	0.4191
GO:0050877	nervous system process	96	1	0.62	0.4711

## Sheet: Set 4
GO.ID	Term	Annotated	Significant	Expected	weightFisher
GO:0006313	transposition, DNA-mediated	35	3	0.19	0.00077
GO:0048132	female germ-line stem cell asymmetric di...	2	1	0.01	0.01106
GO:0097039	protein linear polyubiquitination	2	1	0.01	0.01106
GO:0045676	regulation of R7 cell differentiation	2	1	0.01	0.01106
GO:0061057	peptidoglycan recognition protein signal...	3	1	0.02	0.01654
GO:0038123	toll-like receptor TLR1:TLR2 signaling p...	3	1	0.02	0.01654
GO:2001204	regulation of osteoclast development	4	1	0.02	0.022
GO:1990705	cholangiocyte proliferation	4	1	0.02	0.022
GO:0034130	toll-like receptor 1 signaling pathway	4	1	0.02	0.022
GO:0072014	proximal tubule development	4	1	0.02	0.022
GO:0043011	myeloid dendritic cell differentiation	4	1	0.02	0.022
GO:0002315	marginal zone B cell differentiation	4	1	0.02	0.022
GO:0061073	ciliary body morphogenesis	4	1	0.02	0.022
GO:0072359	circulatory system development	138	2	0.76	0.0268
GO:0042495	detection of triacyl bacterial lipopepti...	5	1	0.03	0.02743
GO:0048318	axial mesoderm development	5	1	0.03	0.02743
GO:0045967	negative regulation of growth rate	5	1	0.03	0.02743
GO:0060413	atrial septum morphogenesis	5	1	0.03	0.02743
GO:0034137	positive regulation of toll-like recepto...	5	1	0.03	0.02743
GO:0035622	intrahepatic bile duct development	5	1	0.03	0.02743
GO:0010470	regulation of gastrulation	5	1	0.03	0.02743
GO:0030718	germ-line stem cell population maintenan...	5	1	0.03	0.02743
GO:0007140	male meiotic nuclear division	5	1	0.03	0.02743
GO:0045672	positive regulation of osteoclast differ...	5	1	0.03	0.02743
GO:0010838	positive regulation of keratinocyte prol...	5	1	0.03	0.02743
GO:0000122	negative regulation of transcription by ...	125	3	0.69	0.02816
GO:0072574	hepatocyte proliferation	6	1	0.03	0.03284
GO:0046849	bone remodeling	6	1	0.03	0.03284
GO:0048339	paraxial mesoderm development	6	1	0.03	0.03284
GO:2000249	regulation of actin cytoskeleton reorgan...	6	1	0.03	0.03284
GO:0072104	glomerular capillary formation	6	1	0.03	0.03284
GO:0031145	anaphase-promoting complex-dependent cat...	6	1	0.03	0.03284
GO:0060674	placenta blood vessel development	6	1	0.03	0.03284
GO:0072015	glomerular visceral epithelial cell deve...	6	1	0.03	0.03284
GO:0002011	morphogenesis of an epithelial sheet	7	1	0.04	0.03821
GO:0070986	left/right axis specification	7	1	0.04	0.03821
GO:0001774	microglial cell activation	7	1	0.04	0.03821
GO:0045879	negative regulation of smoothened signal...	7	1	0.04	0.03821
GO:0016322	neuron remodeling	7	1	0.04	0.03821
GO:0003184	pulmonary valve morphogenesis	7	1	0.04	0.03821
GO:0032755	positive regulation of interleukin-6 pro...	8	1	0.04	0.04356
GO:0018242	protein O-linked glycosylation via serin...	9	1	0.05	0.04888
GO:0032760	positive regulation of tumor necrosis fa...	9	1	0.05	0.04888
GO:0030326	embryonic limb morphogenesis	9	1	0.05	0.04888
GO:0046579	positive regulation of Ras protein signa...	9	1	0.05	0.04888
GO:0030513	positive regulation of BMP signaling pat...	9	1	0.05	0.04888
GO:0001709	cell fate determination	10	1	0.06	0.05417
GO:0001947	heart looping	11	1	0.06	0.05944
GO:0045747	positive regulation of Notch signaling p...	12	1	0.07	0.06468
GO:0042742	defense response to bacterium	17	2	0.09	0.06912
GO:0001756	somitogenesis	14	1	0.08	0.07508
GO:0035264	multicellular organism growth	14	1	0.08	0.07508
GO:0060669	embryonic placenta morphogenesis	16	1	0.09	0.08537
GO:0032757	positive regulation of interleukin-8 pro...	16	1	0.09	0.08537
GO:0071727	cellular response to triacyl bacterial l...	16	1	0.09	0.08537
GO:0070374	positive regulation of ERK1 and ERK2 cas...	17	1	0.09	0.09048
GO:0002755	MyD88-dependent toll-like receptor signa...	19	1	0.11	0.10062
GO:0007219	Notch signaling pathway	35	2	0.19	0.10253
GO:0031647	regulation of protein stability	23	1	0.13	0.12058
GO:0042060	wound healing	26	1	0.14	0.13528
GO:0006959	humoral immune response	27	1	0.15	0.14014
GO:0001701	in utero embryonic development	53	2	0.29	0.15279
GO:0060537	muscle tissue development	43	1	0.24	0.21444
GO:0043065	positive regulation of apoptotic process	44	1	0.24	0.21888
GO:0002437	inflammatory response to antigenic stimu...	49	1	0.27	0.24075
GO:0045087	innate immune response	66	1	0.37	0.31097
GO:0051276	chromosome organization	78	1	0.43	0.3569
GO:0010629	negative regulation of gene expression	83	1	0.46	0.3752
GO:0007417	central nervous system development	103	1	0.57	0.4437
GO:0000278	mitotic cell cycle	114	1	0.63	0.47838

## Sheet: Set 5
GO.ID	Term	Annotated	Significant	Expected	weightFisher
GO:0006313	transposition, DNA-mediated	35	3	0.16	0.00043
GO:0048132	female germ-line stem cell asymmetric di...	2	1	0.01	0.00922
GO:0097039	protein linear polyubiquitination	2	1	0.01	0.00922
GO:0045676	regulation of R7 cell differentiation	2	1	0.01	0.00922
GO:0061057	peptidoglycan recognition protein signal...	3	1	0.01	0.0138
GO:0038123	toll-like receptor TLR1:TLR2 signaling p...	3	1	0.01	0.0138
GO:2001204	regulation of osteoclast development	4	1	0.02	0.01836
GO:1990705	cholangiocyte proliferation	4	1	0.02	0.01836
GO:0034130	toll-like receptor 1 signaling pathway	4	1	0.02	0.01836
GO:0072014	proximal tubule development	4	1	0.02	0.01836
GO:0043011	myeloid dendritic cell differentiation	4	1	0.02	0.01836
GO:0002315	marginal zone B cell differentiation	4	1	0.02	0.01836
GO:0061073	ciliary body morphogenesis	4	1	0.02	0.01836
GO:0072359	circulatory system development	138	2	0.64	0.02197
GO:0042495	detection of triacyl bacterial lipopepti...	5	1	0.02	0.0229
GO:0048318	axial mesoderm development	5	1	0.02	0.0229
GO:0045967	negative regulation of growth rate	5	1	0.02	0.0229
GO:0060413	atrial septum morphogenesis	5	1	0.02	0.0229
GO:0034137	positive regulation of toll-like recepto...	5	1	0.02	0.0229
GO:0035622	intrahepatic bile duct development	5	1	0.02	0.0229
GO:0010470	regulation of gastrulation	5	1	0.02	0.0229
GO:0030718	germ-line stem cell population maintenan...	5	1	0.02	0.0229
GO:0007140	male meiotic nuclear division	5	1	0.02	0.0229
GO:0045672	positive regulation of osteoclast differ...	5	1	0.02	0.0229
GO:0010838	positive regulation of keratinocyte prol...	5	1	0.02	0.0229
GO:0072574	hepatocyte proliferation	6	1	0.03	0.02743
GO:0046849	bone remodeling	6	1	0.03	0.02743
GO:0048339	paraxial mesoderm development	6	1	0.03	0.02743
GO:2000249	regulation of actin cytoskeleton reorgan...	6	1	0.03	0.02743
GO:0072104	glomerular capillary formation	6	1	0.03	0.02743
GO:0031145	anaphase-promoting complex-dependent cat...	6	1	0.03	0.02743
GO:0060674	placenta blood vessel development	6	1	0.03	0.02743
GO:0072015	glomerular visceral epithelial cell deve...	6	1	0.03	0.02743
GO:0002011	morphogenesis of an epithelial sheet	7	1	0.03	0.03193
GO:0070986	left/right axis specification	7	1	0.03	0.03193
GO:0001774	microglial cell activation	7	1	0.03	0.03193
GO:0045879	negative regulation of smoothened signal...	7	1	0.03	0.03193
GO:0016322	neuron remodeling	7	1	0.03	0.03193
GO:0003184	pulmonary valve morphogenesis	7	1	0.03	0.03193
GO:0032755	positive regulation of interleukin-6 pro...	8	1	0.04	0.03642
GO:0018242	protein O-linked glycosylation via serin...	9	1	0.04	0.04088
GO:0032760	positive regulation of tumor necrosis fa...	9	1	0.04	0.04088
GO:0030326	embryonic limb morphogenesis	9	1	0.04	0.04088
GO:0046579	positive regulation of Ras protein signa...	9	1	0.04	0.04088
GO:0030513	positive regulation of BMP signaling pat...	9	1	0.04	0.04088
GO:0001709	cell fate determination	10	1	0.05	0.04533
GO:0001947	heart looping	11	1	0.05	0.04976
GO:0045747	positive regulation of Notch signaling p...	12	1	0.06	0.05417
GO:0042742	defense response to bacterium	17	2	0.08	0.0569
GO:0001756	somitogenesis	14	1	0.06	0.06294
GO:0035264	multicellular organism growth	14	1	0.06	0.06294
GO:0060669	embryonic placenta morphogenesis	16	1	0.07	0.07164
GO:0032757	positive regulation of interleukin-8 pro...	16	1	0.07	0.07164
GO:0071727	cellular response to triacyl bacterial l...	16	1	0.07	0.07164
GO:0070374	positive regulation of ERK1 and ERK2 cas...	17	1	0.08	0.07596
GO:0002755	MyD88-dependent toll-like receptor signa...	19	1	0.09	0.08454
GO:0007219	Notch signaling pathway	35	2	0.16	0.08466
GO:0031647	regulation of protein stability	23	1	0.11	0.1015
GO:0000122	negative regulation of transcription by ...	125	2	0.58	0.10985
GO:0042060	wound healing	26	1	0.12	0.11403
GO:0006959	humoral immune response	27	1	0.12	0.11817
GO:0001701	in utero embryonic development	53	2	0.24	0.1268
GO:0060537	muscle tissue development	43	1	0.2	0.18212
GO:0043065	positive regulation of apoptotic process	44	1	0.2	0.18597
GO:0002437	inflammatory response to antigenic stimu...	49	1	0.23	0.205
GO:0045087	innate immune response	66	1	0.3	0.26674
GO:0051276	chromosome organization	78	1	0.36	0.30768
GO:0010629	negative regulation of gene expression	83	1	0.38	0.32412
GO:0007417	central nervous system development	103	1	0.48	0.38644
GO:0000278	mitotic cell cycle	114	1	0.53	0.41847

## Sheet: Set 6
GO.ID	Term	Annotated	Significant	Expected	weightFisher
GO:0000122	negative regulation of transcription by ...	125	1	0.12	0.11
GO:0015074	DNA integration	150	1	0.14	0.13

## Sheet: Set 7
GO.ID	Term	Annotated	Significant	Expected	weightFisher
GO:0006032	chitin catabolic process	4	2	0.05	0.00076
GO:0000272	polysaccharide catabolic process	8	2	0.09	0.00344
GO:0008203	cholesterol metabolic process	16	3	0.18	0.00505
GO:0048544	recognition of pollen	1	1	0.01	0.01155
GO:0010894	negative regulation of steroid biosynthe...	1	1	0.01	0.01155
GO:0061063	positive regulation of nematode larval d...	1	1	0.01	0.01155
GO:0048467	gynoecium development	1	1	0.01	0.01155
GO:0009616	RNAi-mediated antiviral immune response	1	1	0.01	0.01155
GO:0038026	reelin-mediated signaling pathway	1	1	0.01	0.01155
GO:0007367	segment polarity determination	1	1	0.01	0.01155
GO:0046340	diacylglycerol catabolic process	1	1	0.01	0.01155
GO:0006065	UDP-glucuronate biosynthetic process	1	1	0.01	0.01155
GO:1900006	positive regulation of dendrite developm...	1	1	0.01	0.01155
GO:0010267	primary ta-siRNA processing	1	1	0.01	0.01155
GO:0006361	transcription initiation from RNA polyme...	1	1	0.01	0.01155
GO:0006363	termination of RNA polymerase I transcri...	1	1	0.01	0.01155
GO:0006031	chitin biosynthetic process	1	1	0.01	0.01155
GO:0006000	fructose metabolic process	1	1	0.01	0.01155
GO:0006003	fructose 2,6-bisphosphate metabolic proc...	1	1	0.01	0.01155
GO:0007509	mesoderm migration involved in gastrulat...	1	1	0.01	0.01155
GO:0010492	maintenance of shoot apical meristem ide...	1	1	0.01	0.01155
GO:0007427	epithelial cell migration, open tracheal...	1	1	0.01	0.01155
GO:0015014	heparan sulfate proteoglycan biosyntheti...	1	1	0.01	0.01155
GO:0036316	SREBP-SCAP complex retention in endoplas...	1	1	0.01	0.01155
GO:0048366	leaf development	1	1	0.01	0.01155
GO:0034447	very-low-density lipoprotein particle cl...	1	1	0.01	0.01155
GO:0034436	glycoprotein transport	1	1	0.01	0.01155
GO:0070919	production of siRNA involved in gene sil...	1	1	0.01	0.01155
GO:0008359	regulation of bicoid mRNA localization	2	1	0.02	0.02297
GO:0019448	L-cysteine catabolic process	2	1	0.02	0.02297
GO:0040040	thermosensory behavior	2	1	0.02	0.02297
GO:0010133	proline catabolic process to glutamate	2	1	0.02	0.02297
GO:0048682	sprouting of injured axon	2	1	0.02	0.02297
GO:0007317	regulation of pole plasm oskar mRNA loca...	2	1	0.02	0.02297
GO:0006844	acyl carnitine transport	2	1	0.02	0.02297
GO:0046485	ether lipid metabolic process	2	1	0.02	0.02297
GO:0060363	cranial suture morphogenesis	2	1	0.02	0.02297
GO:0042474	middle ear morphogenesis	2	1	0.02	0.02297
GO:0042412	taurine biosynthetic process	2	1	0.02	0.02297
GO:0008103	oocyte microtubule cytoskeleton polariza...	2	1	0.02	0.02297
GO:0045717	negative regulation of fatty acid biosyn...	2	1	0.02	0.02297
GO:0008355	olfactory learning	3	1	0.03	0.03426
GO:0019433	triglyceride catabolic process	3	1	0.03	0.03426
GO:0072734	cellular response to staurosporine	3	1	0.03	0.03426
GO:0032722	positive regulation of chemokine product...	3	1	0.03	0.03426
GO:0001958	endochondral ossification	3	1	0.03	0.03426
GO:0033280	response to vitamin D	3	1	0.03	0.03426
GO:0007448	anterior/posterior pattern specification...	3	1	0.03	0.03426
GO:0030206	chondroitin sulfate biosynthetic process	3	1	0.03	0.03426
GO:0050892	intestinal absorption	3	1	0.03	0.03426
GO:0007615	anesthesia-resistant memory	3	1	0.03	0.03426
GO:0035332	positive regulation of hippo signaling	3	1	0.03	0.03426
GO:0003006	developmental process involved in reprod...	157	4	1.81	0.04306
GO:0046823	negative regulation of nucleocytoplasmic...	4	1	0.05	0.04543
GO:0006704	glucocorticoid biosynthetic process	4	1	0.05	0.04543
GO:0045880	positive regulation of smoothened signal...	4	1	0.05	0.04543
GO:0034587	piRNA metabolic process	4	1	0.05	0.04543
GO:0035093	spermatogenesis, exchange of chromosomal...	4	1	0.05	0.04543
GO:0060021	roof of mouth development	4	1	0.05	0.04543
GO:0007157	heterophilic cell-cell adhesion via plas...	4	1	0.05	0.04543
GO:0019933	cAMP-mediated signaling	5	1	0.06	0.05647
GO:0046677	response to antibiotic	5	1	0.06	0.05647
GO:0002532	production of molecular mediator involve...	5	1	0.06	0.05647
GO:0031047	gene silencing by RNA	15	2	0.17	0.06503
GO:0006636	unsaturated fatty acid biosynthetic proc...	6	1	0.07	0.06739
GO:0097194	execution phase of apoptosis	6	1	0.07	0.06739
GO:0048864	stem cell development	6	1	0.07	0.06739
GO:2000249	regulation of actin cytoskeleton reorgan...	6	1	0.07	0.06739
GO:0042448	progesterone metabolic process	6	1	0.07	0.06739
GO:0006695	cholesterol biosynthetic process	6	1	0.07	0.06739
GO:0007156	homophilic cell adhesion via plasma memb...	6	1	0.07	0.06739
GO:0045187	regulation of circadian sleep/wake cycle...	7	1	0.08	0.07819
GO:0031214	biomineral tissue development	7	1	0.08	0.07819
GO:0045879	negative regulation of smoothened signal...	7	1	0.08	0.07819
GO:0007476	imaginal disc-derived wing morphogenesis	7	1	0.08	0.07819
GO:0021517	ventral spinal cord development	7	1	0.08	0.07819
GO:0071361	cellular response to ethanol	7	1	0.08	0.07819
GO:0042472	inner ear morphogenesis	7	1	0.08	0.07819
GO:0060993	kidney morphogenesis	8	1	0.09	0.08887
GO:0008543	fibroblast growth factor receptor signal...	8	1	0.09	0.08887
GO:0006641	triglyceride metabolic process	13	2	0.15	0.10583
GO:0042446	hormone biosynthetic process	10	1	0.12	0.10987
GO:0010737	protein kinase A signaling	11	1	0.13	0.1202
GO:0032869	cellular response to insulin stimulus	12	1	0.14	0.13041
GO:0007601	visual perception	12	1	0.14	0.13041
GO:0048729	tissue morphogenesis	63	3	0.73	0.1516
GO:0032436	positive regulation of proteasomal ubiqu...	15	1	0.17	0.16036
GO:0010529	negative regulation of transposition	17	1	0.2	0.17978
GO:0045860	positive regulation of protein kinase ac...	19	1	0.22	0.19877
GO:0048813	dendrite morphogenesis	19	1	0.22	0.19877
GO:0071456	cellular response to hypoxia	21	1	0.24	0.21733
GO:0006865	amino acid transport	21	1	0.24	0.21733
GO:0006493	protein O-linked glycosylation	21	1	0.24	0.21733
GO:0006898	receptor-mediated endocytosis	23	1	0.27	0.23548
GO:0006869	lipid transport	24	1	0.28	0.2444
GO:0006915	apoptotic process	143	3	1.65	0.26417
GO:0006412	translation	67	2	0.77	0.282
GO:0016055	Wnt signaling pathway	30	1	0.35	0.29588
GO:0016311	dephosphorylation	35	1	0.4	0.33619
GO:0071407	cellular response to organic cyclic comp...	46	3	0.53	0.35793
GO:0051321	meiotic cell cycle	38	1	0.44	0.3593
GO:0006417	regulation of translation	38	1	0.44	0.3593
GO:0007275	multicellular organism development	518	9	5.98	0.38161
GO:0042981	regulation of apoptotic process	115	2	1.33	0.38674
GO:0006468	protein phosphorylation	117	2	1.35	0.42829
GO:0009617	response to bacterium	49	1	0.57	0.43761
GO:0050804	modulation of chemical synaptic transmis...	50	1	0.58	0.44425
GO:0006508	proteolysis	159	2	1.84	0.47332
GO:0010628	positive regulation of gene expression	87	2	1	0.47362
GO:0030855	epithelial cell differentiation	57	1	0.66	0.4887
GO:0015074	DNA integration	150	2	1.73	0.52594
GO:0098609	cell-cell adhesion	89	2	1.03	0.57053
GO:0002376	immune system process	242	2	2.79	0.65223
GO:0051301	cell division	99	1	1.14	0.69175
GO:0006310	DNA recombination	118	1	1.36	0.75566
GO:0007049	cell cycle	210	2	2.42	0.86935
GO:0062014	negative regulation of small molecule me...	7	1	0.08	1
GO:0035220	wing disc development	9	1	0.1	1
GO:1904888	cranial skeletal system development	9	1	0.1	1
GO:0008078	mesodermal cell migration	2	1	0.02	1
GO:0044255	cellular lipid metabolic process	102	3	1.18	1
GO:0033692	cellular polysaccharide biosynthetic pro...	5	1	0.06	1
GO:0044257	cellular protein catabolic process	100	1	1.15	1
GO:0010646	regulation of cell communication	256	2	2.96	1
GO:0048522	positive regulation of cellular process	398	2	4.6	1
GO:0010647	positive regulation of cell communicatio...	125	1	1.44	1
GO:0048523	negative regulation of cellular process	462	3	5.33	1
GO:0010648	negative regulation of cell communicatio...	84	2	0.97	1
GO:0120035	regulation of plasma membrane bounded ce...	44	1	0.51	1
GO:0012501	programmed cell death	146	3	1.69	1
GO:0044281	small molecule metabolic process	229	9	2.64	1
GO:0097305	response to alcohol	41	1	0.47	1
GO:0120036	plasma membrane bounded cell projection ...	157	2	1.81	1
GO:0044282	small molecule catabolic process	43	2	0.5	1
GO:0097306	cellular response to alcohol	15	1	0.17	1
GO:0044283	small molecule biosynthetic process	62	4	0.72	1
GO:0034637	cellular carbohydrate biosynthetic proce...	7	1	0.08	1
GO:0019694	alkanesulfonate metabolic process	2	1	0.02	1
GO:0120039	plasma membrane bounded cell projection ...	73	1	0.84	1
GO:0010631	epithelial cell migration	34	1	0.39	1
GO:1901575	organic substance catabolic process	252	6	2.91	1
GO:0010975	regulation of neuron projection developm...	33	1	0.38	1
GO:1901576	organic substance biosynthetic process	839	10	9.69	1
GO:0019752	carboxylic acid metabolic process	103	5	1.19	1
GO:0010976	positive regulation of neuron projection...	8	1	0.09	1
GO:0035556	intracellular signal transduction	181	1	2.09	1
GO:0043067	regulation of programmed cell death	115	2	1.33	1
GO:0006403	RNA localization	22	1	0.25	1
GO:0046907	intracellular transport	164	1	1.89	1
GO:0044344	cellular response to fibroblast growth f...	10	1	0.12	1
GO:0031048	heterochromatin assembly by small RNA	1	1	0.01	1
GO:0048511	rhythmic process	29	1	0.33	1
GO:0048512	circadian behavior	10	1	0.12	1
GO:0090567	reproductive shoot system development	1	1	0.01	1
GO:0048513	animal organ development	329	5	3.8	1
GO:0050810	regulation of steroid biosynthetic proce...	3	1	0.03	1
GO:0008298	intracellular mRNA localization	3	1	0.03	1
GO:0048515	spermatid differentiation	13	1	0.15	1
GO:0008358	maternal determination of anterior/poste...	2	1	0.02	1
GO:0048518	positive regulation of biological proces...	452	4	5.22	1
GO:0044271	cellular nitrogen compound biosynthetic ...	690	4	7.97	1
GO:0048519	negative regulation of biological proces...	509	4	5.88	1
GO:0044272	sulfur compound biosynthetic process	20	2	0.23	1
GO:0044273	sulfur compound catabolic process	6	1	0.07	1
GO:0040029	regulation of gene expression, epigeneti...	8	1	0.09	1
GO:0071495	cellular response to endogenous stimulus	104	3	1.2	1
GO:0120254	olefinic compound metabolic process	15	1	0.17	1
GO:0009725	response to hormone	65	1	0.75	1
GO:0040011	locomotion	164	1	1.89	1
GO:0009991	response to extracellular stimulus	38	1	0.44	1
GO:0031323	regulation of cellular metabolic process	717	4	8.28	1
GO:0031324	negative regulation of cellular metaboli...	243	1	2.81	1
GO:0009994	oocyte differentiation	6	1	0.07	1
GO:0031325	positive regulation of cellular metaboli...	201	2	2.32	1
GO:0031326	regulation of cellular biosynthetic proc...	582	2	6.72	1
GO:0031327	negative regulation of cellular biosynth...	198	1	2.29	1
GO:0009653	anatomical structure morphogenesis	281	6	3.24	1
GO:0043085	positive regulation of catalytic activit...	78	1	0.9	1
GO:0006629	lipid metabolic process	139	5	1.61	1
GO:0031329	regulation of cellular catabolic process	62	1	0.72	1
GO:0061136	regulation of proteasomal protein catabo...	26	1	0.3	1
GO:0021700	developmental maturation	31	1	0.36	1
GO:0006950	response to stress	348	5	4.02	1
GO:0046822	regulation of nucleocytoplasmic transpor...	12	1	0.14	1
GO:0006952	defense response	147	2	1.7	1
GO:0006954	inflammatory response	88	1	1.02	1
GO:0035239	tube morphogenesis	96	1	1.11	1
GO:0009719	response to endogenous stimulus	123	3	1.42	1
GO:0006955	immune response	156	1	1.8	1
GO:0090304	nucleic acid metabolic process	852	5	9.84	1
GO:0019438	aromatic compound biosynthetic process	604	2	6.97	1
GO:0042180	cellular ketone metabolic process	28	2	0.32	1
GO:0010941	regulation of cell death	125	2	1.44	1
GO:0008037	cell recognition	21	1	0.24	1
GO:0033993	response to lipid	54	2	0.62	1
GO:0010604	positive regulation of macromolecule met...	236	3	2.73	1
GO:0010605	negative regulation of macromolecule met...	269	2	3.11	1
GO:0045922	negative regulation of fatty acid metabo...	3	1	0.03	1
GO:0061062	regulation of nematode larval developmen...	2	1	0.02	1
GO:0010608	post-transcriptional regulation of gene ...	49	2	0.57	1
GO:0006984	ER-nucleus signaling pathway	5	1	0.06	1
GO:0030951	establishment or maintenance of microtub...	2	1	0.02	1
GO:0030952	establishment or maintenance of cytoskel...	3	1	0.03	1
GO:0070887	cellular response to chemical stimulus	227	6	2.62	1
GO:0031344	regulation of cell projection organizati...	45	1	0.52	1
GO:0044242	cellular lipid catabolic process	25	1	0.29	1
GO:0031346	positive regulation of cell projection o...	24	1	0.28	1
GO:0046394	carboxylic acid biosynthetic process	35	3	0.4	1
GO:0046395	carboxylic acid catabolic process	27	2	0.31	1
GO:0008595	anterior/posterior axis specification, e...	4	1	0.05	1
GO:0042176	regulation of protein catabolic process	44	1	0.51	1
GO:0098727	maintenance of cell number	15	1	0.17	1
GO:0048468	cell development	202	4	2.33	1
GO:0044248	cellular catabolic process	229	4	2.64	1
GO:0046398	UDP-glucuronate metabolic process	1	1	0.01	1
GO:0048469	cell maturation	20	1	0.23	1
GO:0044249	cellular biosynthetic process	826	8	9.54	1
GO:1902652	secondary alcohol metabolic process	17	3	0.2	1
GO:1902653	secondary alcohol biosynthetic process	6	1	0.07	1
GO:0006631	fatty acid metabolic process	39	2	0.45	1
GO:0031331	positive regulation of cellular cataboli...	40	1	0.46	1
GO:0006633	fatty acid biosynthetic process	15	2	0.17	1
GO:0000902	cell morphogenesis	98	1	1.13	1
GO:0009966	regulation of signal transduction	201	2	2.32	1
GO:0071453	cellular response to oxygen levels	23	1	0.27	1
GO:0009967	positive regulation of signal transducti...	107	1	1.24	1
GO:0006638	neutral lipid metabolic process	16	2	0.18	1
GO:0000904	cell morphogenesis involved in different...	76	1	0.88	1
GO:0009968	negative regulation of signal transducti...	82	2	0.95	1
GO:0006639	acylglycerol metabolic process	16	2	0.18	1
GO:0016192	vesicle-mediated transport	165	1	1.91	1
GO:0072733	response to staurosporine	3	1	0.03	1
GO:0044237	cellular metabolic process	1499	17	17.31	1
GO:0009628	response to abiotic stimulus	102	2	1.18	1
GO:0044238	primary metabolic process	1464	19	16.91	1
GO:0033674	positive regulation of kinase activity	26	1	0.3	1
GO:0071501	cellular response to sterol depletion	3	1	0.03	1
GO:0060429	epithelium development	108	2	1.25	1
GO:0000096	sulfur amino acid metabolic process	8	1	0.09	1
GO:0000098	sulfur amino acid catabolic process	3	1	0.03	1
GO:0032501	multicellular organismal process	679	11	7.84	1
GO:0032502	developmental process	608	11	7.02	1
GO:0050802	circadian sleep/wake cycle, sleep	8	1	0.09	1
GO:0009952	anterior/posterior pattern specification	30	1	0.35	1
GO:0048507	meristem development	1	1	0.01	1
GO:0006928	movement of cell or subcellular componen...	177	1	2.04	1
GO:0032504	multicellular organism reproduction	130	2	1.5	1
GO:0070828	heterochromatin organization	4	1	0.05	1
GO:0009611	response to wounding	46	1	0.53	1
GO:0098742	cell-cell adhesion via plasma-membrane a...	15	1	0.17	1
GO:0043043	peptide biosynthetic process	69	2	0.8	1
GO:0032507	maintenance of protein location in cell	10	1	0.12	1
GO:0009615	response to virus	16	1	0.18	1
GO:0045184	establishment of protein localization	166	1	1.92	1
GO:0007399	nervous system development	222	2	2.56	1
GO:0045185	maintenance of protein location	13	1	0.15	1
GO:0006913	nucleocytoplasmic transport	30	1	0.35	1
GO:0015697	quaternary ammonium group transport	2	1	0.02	1
GO:0051651	maintenance of location in cell	24	1	0.28	1
GO:0045937	positive regulation of phosphate metabol...	54	1	0.62	1
GO:0014070	response to organic cyclic compound	83	3	0.96	1
GO:0045939	negative regulation of steroid metabolic...	4	1	0.05	1
GO:0009987	cellular process	2068	22	23.88	1
GO:0040007	growth	98	1	1.13	1
GO:0051716	cellular response to stimulus	582	6	6.72	1
GO:0048477	oogenesis	29	1	0.33	1
GO:0006897	endocytosis	60	1	0.69	1
GO:0001501	skeletal system development	34	2	0.39	1
GO:0030162	regulation of proteolysis	40	1	0.46	1
GO:0065007	biological regulation	1290	10	14.9	1
GO:0001503	ossification	20	1	0.23	1
GO:0030163	protein catabolic process	114	1	1.32	1
GO:0065008	regulation of biological quality	314	1	3.63	1
GO:0065009	regulation of molecular function	170	1	1.96	1
GO:0030166	proteoglycan biosynthetic process	7	1	0.08	1
GO:0019953	sexual reproduction	123	2	1.42	1
GO:0070848	response to growth factor	51	1	0.59	1
GO:0045862	positive regulation of proteolysis	26	1	0.3	1
GO:0008211	glucocorticoid metabolic process	4	1	0.05	1
GO:0005996	monosaccharide metabolic process	22	1	0.25	1
GO:0070085	glycosylation	71	1	0.82	1
GO:0030154	cell differentiation	358	5	4.13	1
GO:0008219	cell death	154	3	1.78	1
GO:0071695	anatomical structure maturation	25	1	0.29	1
GO:0010876	lipid localization	34	1	0.39	1
GO:0051674	localization of cell	113	1	1.3	1
GO:0048699	generation of neurons	134	2	1.55	1
GO:0198738	cell-cell signaling by wnt	30	1	0.35	1
GO:0007365	periodic partitioning	1	1	0.01	1
GO:0071417	cellular response to organonitrogen comp...	46	2	0.53	1
GO:0007369	gastrulation	21	1	0.24	1
GO:0045859	regulation of protein kinase activity	37	1	0.43	1
GO:0008589	regulation of smoothened signaling pathw...	8	1	0.09	1
GO:0030182	neuron differentiation	129	2	1.49	1
GO:0007028	cytoplasm organization	2	1	0.02	1
GO:0008306	associative learning	6	1	0.07	1
GO:0007292	female gamete generation	35	1	0.4	1
GO:0110148	biomineralization	7	1	0.08	1
GO:0007350	blastoderm segmentation	6	2	0.07	1
GO:0007351	tripartite regional subdivision	4	1	0.05	1
GO:0007010	cytoskeleton organization	159	1	1.84	1
GO:0009890	negative regulation of biosynthetic proc...	200	1	2.31	1
GO:0009892	negative regulation of metabolic process	286	3	3.3	1
GO:0032787	monocarboxylic acid metabolic process	64	2	0.74	1
GO:0019637	organophosphate metabolic process	109	1	1.26	1
GO:0009893	positive regulation of metabolic process	258	3	2.98	1
GO:1901698	response to nitrogen compound	98	2	1.13	1
GO:2000638	regulation of SREBP signaling pathway	2	1	0.02	1
GO:0009894	regulation of catabolic process	79	1	0.91	1
GO:1901699	cellular response to nitrogen compound	53	2	0.61	1
GO:2000639	negative regulation of SREBP signaling p...	1	1	0.01	1
GO:0009896	positive regulation of catabolic process	43	1	0.5	1
GO:0007017	microtubule-based process	118	1	1.36	1
GO:0010817	regulation of hormone levels	44	1	0.51	1
GO:0071774	response to fibroblast growth factor	10	1	0.12	1
GO:0043279	response to alkaloid	12	1	0.14	1
GO:0031497	chromatin assembly	6	1	0.07	1
GO:0032774	RNA biosynthetic process	535	1	6.18	1
GO:0009948	anterior/posterior axis specification	5	1	0.06	1
GO:0009605	response to external stimulus	222	3	2.56	1
GO:0009607	response to biotic stimulus	99	2	1.14	1
GO:0048438	floral whorl development	1	1	0.01	1
GO:0032434	regulation of proteasomal ubiquitin-depe...	20	1	0.23	1
GO:0007389	pattern specification process	67	2	0.77	1
GO:0051641	cellular localization	275	2	3.18	1
GO:0048666	neuron development	116	2	1.34	1
GO:0048667	cell morphogenesis involved in neuron di...	69	1	0.8	1
GO:1903050	regulation of proteolysis involved in ce...	27	1	0.31	1
GO:1903052	positive regulation of proteolysis invol...	16	1	0.18	1
GO:0051649	establishment of localization in cell	216	1	2.49	1
GO:0031532	actin cytoskeleton reorganization	13	1	0.15	1
GO:0051707	response to other organism	97	2	1.12	1
GO:0032990	cell part morphogenesis	75	1	0.87	1
GO:0016125	sterol metabolic process	17	3	0.2	1
GO:0016126	sterol biosynthetic process	7	1	0.08	1
GO:0042074	cell migration involved in gastrulation	2	1	0.02	1
GO:0002164	larval development	6	1	0.07	1
GO:0019941	modification-dependent protein catabolic...	83	1	0.96	1
GO:0002165	instar larval or pupal development	13	1	0.15	1
GO:0098916	anterograde trans-synaptic signaling	84	1	0.97	1
GO:0007267	cell-cell signaling	146	2	1.69	1
GO:0007268	chemical synaptic transmission	84	1	0.97	1
GO:0045814	negative regulation of gene expression, ...	7	1	0.08	1
GO:0008202	steroid metabolic process	40	4	0.46	1
GO:0043583	ear development	19	1	0.22	1
GO:0010073	meristem maintenance	1	1	0.01	1
GO:0046348	amino sugar catabolic process	5	2	0.06	1
GO:0010074	maintenance of meristem identity	1	1	0.01	1
GO:0046349	amino sugar biosynthetic process	1	1	0.01	1
GO:0008207	C21-steroid hormone metabolic process	6	1	0.07	1
GO:0006139	nucleobase-containing compound metabolic...	926	6	10.69	1
GO:0019932	second-messenger-mediated signaling	35	1	0.4	1
GO:0001666	response to hypoxia	30	1	0.35	1
GO:0001667	ameboidal-type cell migration	38	1	0.44	1
GO:0019935	cyclic-nucleotide-mediated signaling	11	1	0.13	1
GO:1901652	response to peptide	32	1	0.37	1
GO:1901653	cellular response to peptide	23	1	0.27	1
GO:0007314	oocyte anterior/posterior axis specifica...	2	1	0.02	1
GO:0022008	neurogenesis	149	2	1.72	1
GO:0007315	pole plasm assembly	2	1	0.02	1
GO:0005975	carbohydrate metabolic process	83	4	0.96	1
GO:0007316	pole plasm RNA localization	2	1	0.02	1
GO:0005976	polysaccharide metabolic process	14	3	0.16	1
GO:0046339	diacylglycerol metabolic process	2	1	0.02	1
GO:0009856	pollination	1	1	0.01	1
GO:1904580	regulation of intracellular mRNA localiz...	3	1	0.03	1
GO:0051169	nuclear transport	30	1	0.35	1
GO:0097659	nucleic acid-templated transcription	535	1	6.18	1
GO:0001655	urogenital system development	36	1	0.42	1
GO:0048731	system development	436	7	5.03	1
GO:0007281	germ cell development	44	2	0.51	1
GO:1903362	regulation of cellular protein catabolic...	32	1	0.37	1
GO:0007283	spermatogenesis	80	1	0.92	1
GO:0035437	maintenance of protein localization in e...	1	1	0.01	1
GO:1903364	positive regulation of cellular protein ...	21	1	0.24	1
GO:0061564	axon development	56	1	0.65	1
GO:0048678	response to axon injury	17	1	0.2	1
GO:0006810	transport	420	4	4.85	1
GO:0006066	alcohol metabolic process	47	3	0.54	1
GO:0048736	appendage development	20	1	0.23	1
GO:0007286	spermatid development	13	1	0.15	1
GO:0045833	negative regulation of lipid metabolic p...	7	1	0.08	1
GO:0009093	cysteine catabolic process	2	1	0.02	1
GO:0048737	imaginal disc-derived appendage developm...	8	1	0.09	1
GO:0045087	innate immune response	66	1	0.76	1
GO:0009908	flower development	1	1	0.01	1
GO:0009880	embryonic pattern specification	6	2	0.07	1
GO:0007289	spermatid nucleus differentiation	5	1	0.06	1
GO:0034381	plasma lipoprotein particle clearance	4	1	0.05	1
GO:0009886	post-embryonic animal morphogenesis	11	1	0.13	1
GO:0009887	animal organ morphogenesis	97	4	1.12	1
GO:0031507	heterochromatin assembly	4	1	0.05	1
GO:0009888	tissue development	171	6	1.97	1
GO:0044419	biological process involved in interspec...	113	2	1.3	1
GO:0009889	regulation of biosynthetic process	587	2	6.78	1
GO:0006396	RNA processing	89	1	1.03	1
GO:0051603	proteolysis involved in cellular protein...	93	1	1.07	1
GO:0042048	olfactory behavior	3	1	0.03	1
GO:0140546	defense response to symbiont	13	1	0.15	1
GO:0007276	gamete generation	117	2	1.35	1
GO:0051607	defense response to virus	13	1	0.15	1
GO:0007560	imaginal disc morphogenesis	10	1	0.12	1
GO:0009875	pollen-pistil interaction	1	1	0.01	1
GO:2000112	regulation of cellular macromolecule bio...	46	1	0.53	1
GO:0032956	regulation of actin cytoskeleton organiz...	19	1	0.22	1
GO:0006082	organic acid metabolic process	105	5	1.21	1
GO:0007224	smoothened signaling pathway	16	1	0.18	1
GO:0019094	pole plasm mRNA localization	2	1	0.02	1
GO:0051171	regulation of nitrogen compound metaboli...	692	3	7.99	1
GO:0046305	alkanesulfonate biosynthetic process	2	1	0.02	1
GO:0099536	synaptic signaling	87	1	1	1
GO:0099537	trans-synaptic signaling	84	1	0.97	1
GO:0051173	positive regulation of nitrogen compound...	191	2	2.21	1
GO:0010033	response to organic substance	241	5	2.78	1
GO:0051174	regulation of phosphorus metabolic proce...	82	1	0.95	1
GO:0042325	regulation of phosphorylation	76	1	0.88	1
GO:0032196	transposition	83	1	0.96	1
GO:0007552	metamorphosis	11	1	0.13	1
GO:0042327	positive regulation of phosphorylation	51	1	0.59	1
GO:0051179	localization	546	6	6.3	1
GO:0016051	carbohydrate biosynthetic process	17	1	0.2	1
GO:0043549	regulation of kinase activity	45	1	0.52	1
GO:0016052	carbohydrate catabolic process	29	2	0.33	1
GO:0048646	anatomical structure formation involved ...	137	1	1.58	1
GO:0032642	regulation of chemokine production	3	1	0.03	1
GO:0071702	organic substance transport	251	2	2.9	1
GO:0016053	organic acid biosynthetic process	37	4	0.43	1
GO:0043207	response to external biotic stimulus	97	2	1.12	1
GO:0071704	organic substance metabolic process	1561	20	18.03	1
GO:0016054	organic acid catabolic process	27	2	0.31	1
GO:0002119	nematode larval development	3	1	0.03	1
GO:0032989	cellular component morphogenesis	92	1	1.06	1
GO:0048705	skeletal system morphogenesis	17	2	0.2	1
GO:0071705	nitrogen compound transport	222	2	2.56	1
GO:0009063	cellular amino acid catabolic process	15	2	0.17	1
GO:0048707	instar larval or pupal morphogenesis	11	1	0.13	1
GO:0009064	glutamine family amino acid metabolic pr...	9	1	0.1	1
GO:1901615	organic hydroxy compound metabolic proce...	66	3	0.76	1
GO:0009065	glutamine family amino acid catabolic pr...	2	1	0.02	1
GO:0000003	reproduction	207	4	2.39	1
GO:1901617	organic hydroxy compound biosynthetic pr...	19	1	0.22	1
GO:0006360	transcription by RNA polymerase I	4	1	0.05	1
GO:0032970	regulation of actin filament-based proce...	24	1	0.28	1
GO:0009069	serine family amino acid metabolic proce...	8	1	0.09	1
GO:0051128	regulation of cellular component organiz...	174	2	2.01	1
GO:0007584	response to nutrient	15	1	0.17	1
GO:0000271	polysaccharide biosynthetic process	5	1	0.06	1
GO:0007586	digestion	9	1	0.1	1
GO:0055086	nucleobase-containing small molecule met...	80	1	0.92	1
GO:0006022	aminoglycan metabolic process	18	4	0.21	1
GO:0006023	aminoglycan biosynthetic process	12	2	0.14	1
GO:0006024	glycosaminoglycan biosynthetic process	10	1	0.12	1
GO:0006026	aminoglycan catabolic process	6	2	0.07	1
GO:1901700	response to oxygen-containing compound	120	3	1.39	1
GO:1901701	cellular response to oxygen-containing c...	79	2	0.91	1
GO:0006029	proteoglycan metabolic process	8	1	0.09	1
GO:0009056	catabolic process	274	6	3.16	1
GO:0009057	macromolecule catabolic process	149	3	1.72	1
GO:0009058	biosynthetic process	853	10	9.85	1
GO:0007308	oocyte construction	3	1	0.03	1
GO:0009100	glycoprotein metabolic process	82	2	0.95	1
GO:0007309	oocyte axis specification	2	1	0.02	1
GO:0006351	transcription, DNA-templated	534	1	6.17	1
GO:0009059	macromolecule biosynthetic process	704	6	8.13	1
GO:0009101	glycoprotein biosynthetic process	78	2	0.9	1
GO:0006352	DNA-templated transcription, initiation	17	1	0.2	1
GO:0006353	DNA-templated transcription, termination	2	1	0.02	1
GO:0019827	stem cell population maintenance	15	1	0.17	1
GO:0016070	RNA metabolic process	628	3	7.25	1
GO:2000060	positive regulation of ubiquitin-depende...	15	1	0.17	1
GO:0051094	positive regulation of developmental pro...	89	2	1.03	1
GO:0001704	formation of primary germ layer	13	1	0.15	1
GO:0000226	microtubule cytoskeleton organization	80	1	0.92	1
GO:0001707	mesoderm formation	5	1	0.06	1
GO:0006807	nitrogen compound metabolic process	1399	16	16.15	1
GO:1905114	cell surface receptor signaling pathway ...	37	1	0.43	1
GO:0030029	actin filament-based process	70	1	0.81	1
GO:0006040	amino sugar metabolic process	7	3	0.08	1
GO:0035194	post-transcriptional gene silencing by R...	9	1	0.1	1
GO:0050790	regulation of catalytic activity	118	1	1.36	1
GO:0042221	response to chemical	351	6	4.05	1
GO:0009071	serine family amino acid catabolic proce...	3	1	0.03	1
GO:0050793	regulation of developmental process	231	2	2.67	1
GO:0051130	positive regulation of cellular componen...	77	1	0.89	1
GO:0050794	regulation of cellular process	1169	6	13.5	1
GO:0050795	regulation of behavior	16	1	0.18	1
GO:2000058	regulation of ubiquitin-dependent protei...	21	1	0.24	1
GO:0003002	regionalization	54	2	0.62	1
GO:0010562	positive regulation of phosphorus metabo...	54	1	0.62	1
GO:0031667	response to nutrient levels	37	1	0.43	1
GO:0006030	chitin metabolic process	5	3	0.06	1
GO:0010565	regulation of cellular ketone metabolic ...	9	1	0.1	1
GO:0032602	chemokine production	3	1	0.03	1
GO:0003008	system process	164	3	1.89	1
GO:0048608	reproductive structure development	57	1	0.66	1
GO:0016358	dendrite development	31	1	0.36	1
GO:0048609	multicellular organismal reproductive pr...	130	2	1.5	1
GO:0043486	histone exchange	8	1	0.09	1
GO:0007498	mesoderm development	22	1	0.25	1
GO:0032933	SREBP signaling pathway	3	1	0.03	1
GO:0006325	chromatin organization	36	2	0.42	1
GO:0010556	regulation of macromolecule biosynthetic...	569	1	6.57	1
GO:0016042	lipid catabolic process	39	1	0.45	1
GO:0016043	cellular component organization	530	4	6.12	1
GO:0000578	embryonic axis specification	4	1	0.05	1
GO:0030030	cell projection organization	160	2	1.85	1
GO:0046461	neutral lipid catabolic process	5	1	0.06	1
GO:0046464	acylglycerol catabolic process	5	1	0.06	1
GO:0016049	cell growth	36	1	0.42	1
GO:1901605	alpha-amino acid metabolic process	31	2	0.36	1
GO:0033365	protein localization to organelle	79	1	0.91	1
GO:0030036	actin cytoskeleton organization	62	1	0.72	1
GO:1901606	alpha-amino acid catabolic process	15	2	0.17	1
GO:0042304	regulation of fatty acid biosynthetic pr...	4	1	0.05	1
GO:0034248	regulation of cellular amide metabolic p...	46	1	0.53	1
GO:0031401	positive regulation of protein modificat...	61	1	0.7	1
GO:0051051	negative regulation of transport	30	1	0.35	1
GO:0006259	DNA metabolic process	266	2	3.07	1
GO:0048863	stem cell differentiation	15	1	0.17	1
GO:0010243	response to organonitrogen compound	92	2	1.06	1
GO:0051055	negative regulation of lipid biosyntheti...	4	1	0.05	1
GO:0048869	cellular developmental process	361	5	4.17	1
GO:0044706	multi-multicellular organism process	11	1	0.13	1
GO:2000026	regulation of multicellular organismal d...	140	1	1.62	1
GO:0001932	regulation of protein phosphorylation	69	1	0.8	1
GO:0032868	response to insulin	14	1	0.16	1
GO:0001934	positive regulation of protein phosphory...	47	1	0.54	1
GO:0046503	glycerolipid catabolic process	7	1	0.08	1
GO:0061458	reproductive system development	57	1	0.66	1
GO:0016325	oocyte microtubule cytoskeleton organiza...	2	1	0.02	1
GO:0043412	macromolecule modification	395	3	4.56	1
GO:0043413	macromolecule glycosylation	71	1	0.82	1
GO:0048856	anatomical structure development	581	11	6.71	1
GO:0046483	heterocycle metabolic process	950	6	10.97	1
GO:0048858	cell projection morphogenesis	73	1	0.84	1
GO:0046486	glycerolipid metabolic process	35	2	0.4	1
GO:0033043	regulation of organelle organization	82	1	0.95	1
GO:0016310	phosphorylation	132	2	1.52	1
GO:0060810	intracellular mRNA localization involved...	2	1	0.02	1
GO:0060811	intracellular mRNA localization involved...	2	1	0.02	1
GO:0036075	replacement ossification	3	1	0.03	1
GO:0009266	response to temperature stimulus	17	1	0.2	1
GO:0006338	chromatin remodeling	20	1	0.23	1
GO:0010528	regulation of transposition	17	1	0.2	1
GO:0006560	proline metabolic process	3	1	0.03	1
GO:0006562	proline catabolic process	2	1	0.02	1
GO:0050789	regulation of biological process	1223	9	14.12	1
GO:0033036	macromolecule localization	266	3	3.07	1
GO:0048870	cell motility	113	1	1.3	1
GO:0043434	response to peptide hormone	25	1	0.29	1
GO:0032870	cellular response to hormone stimulus	42	1	0.48	1
GO:0043436	oxoacid metabolic process	103	5	1.19	1
GO:0036293	response to decreased oxygen levels	31	1	0.36	1
GO:0050773	regulation of dendrite development	13	1	0.15	1
GO:0036294	cellular response to decreased oxygen le...	21	1	0.24	1
GO:1903510	mucopolysaccharide metabolic process	7	1	0.08	1
GO:0010498	proteasomal protein catabolic process	71	1	0.82	1
GO:0035120	post-embryonic appendage morphogenesis	8	1	0.09	1
GO:0097094	craniofacial suture morphogenesis	3	1	0.03	1
GO:0072595	maintenance of protein localization in o...	2	1	0.02	1
GO:0032879	regulation of localization	192	1	2.22	1
GO:0008610	lipid biosynthetic process	62	3	0.72	1
GO:0071824	protein-DNA complex subunit organization	20	1	0.23	1
GO:0015849	organic acid transport	42	1	0.48	1
GO:0007472	wing disc morphogenesis	7	1	0.08	1
GO:0070482	response to oxygen levels	32	1	0.37	1
GO:0048827	phyllome development	1	1	0.01	1
GO:0080090	regulation of primary metabolic process	704	4	8.13	1
GO:0022410	circadian sleep/wake cycle process	9	1	0.1	1
GO:0099402	plant organ development	1	1	0.01	1
GO:0022412	cellular process involved in reproductio...	49	2	0.57	1
GO:0022414	reproductive process	202	4	2.33	1
GO:0050650	chondroitin sulfate proteoglycan biosynt...	4	1	0.05	1
GO:0035114	imaginal disc-derived appendage morphoge...	8	1	0.09	1
GO:1901135	carbohydrate derivative metabolic proces...	171	6	1.97	1
GO:1901136	carbohydrate derivative catabolic proces...	15	2	0.17	1
GO:0048812	neuron projection morphogenesis	73	1	0.84	1
GO:1901137	carbohydrate derivative biosynthetic pro...	120	3	1.39	1
GO:0050654	chondroitin sulfate proteoglycan metabol...	4	1	0.05	1
GO:0072001	renal system development	35	1	0.4	1
GO:0035092	sperm DNA condensation	5	1	0.06	1
GO:0007423	sensory organ development	54	1	0.62	1
GO:0019318	hexose metabolic process	15	1	0.17	1
GO:0007424	open tracheal system development	9	1	0.1	1
GO:0051049	regulation of transport	136	1	1.57	1
GO:0021510	spinal cord development	16	1	0.18	1
GO:0071396	cellular response to lipid	34	1	0.39	1
GO:0071840	cellular component organization or bioge...	569	4	6.57	1
GO:0072330	monocarboxylic acid biosynthetic process	20	2	0.23	1
GO:0009225	nucleotide-sugar metabolic process	4	1	0.05	1
GO:0001822	kidney development	30	1	0.35	1
GO:0009226	nucleotide-sugar biosynthetic process	3	1	0.03	1
GO:0033273	response to vitamin	7	1	0.08	1
GO:0080134	regulation of response to stress	97	1	1.12	1
GO:0006520	cellular amino acid metabolic process	38	2	0.44	1
GO:0080135	regulation of cellular response to stres...	62	1	0.72	1
GO:0060350	endochondral bone morphogenesis	4	1	0.05	1
GO:0007417	central nervous system development	103	1	1.19	1
GO:0010467	gene expression	786	6	9.08	1
GO:0010468	regulation of gene expression	670	4	7.74	1
GO:0046439	L-cysteine metabolic process	2	1	0.02	1
GO:0006511	ubiquitin-dependent protein catabolic pr...	82	1	0.95	1
GO:0001816	cytokine production	57	1	0.66	1
GO:0001817	regulation of cytokine production	57	1	0.66	1
GO:0007444	imaginal disc development	13	1	0.15	1
GO:0001819	positive regulation of cytokine producti...	31	1	0.36	1
GO:0048839	inner ear development	17	1	0.2	1
GO:0015012	heparan sulfate proteoglycan biosyntheti...	4	1	0.05	1
GO:0007447	imaginal disc pattern formation	6	1	0.07	1
GO:0019220	regulation of phosphate metabolic proces...	82	1	0.95	1
GO:0036314	response to sterol	7	1	0.08	1
GO:0006518	peptide metabolic process	96	2	1.11	1
GO:0002009	morphogenesis of an epithelium	45	1	0.52	1
GO:0036315	cellular response to sterol	2	1	0.02	1
GO:0019222	regulation of metabolic process	807	6	9.32	1
GO:0090130	tissue migration	34	1	0.39	1
GO:0033554	cellular response to stress	169	3	1.95	1
GO:0090132	epithelium migration	34	1	0.39	1
GO:0044093	positive regulation of molecular functio...	115	1	1.33	1
GO:0033559	unsaturated fatty acid metabolic process	12	1	0.14	1
GO:0042471	ear morphogenesis	8	1	0.09	1
GO:0071363	cellular response to growth factor stimu...	51	1	0.59	1
GO:0008150	biological_process	2165	25	25	1
GO:0034470	ncRNA processing	46	1	0.53	1
GO:0008152	metabolic process	1608	21	18.57	1
GO:0050953	sensory perception of light stimulus	13	1	0.15	1
GO:0048367	shoot system development	1	1	0.01	1
GO:0019216	regulation of lipid metabolic process	26	1	0.3	1
GO:0019217	regulation of fatty acid metabolic proce...	8	1	0.09	1
GO:0051347	positive regulation of transferase activ...	37	1	0.43	1
GO:0019218	regulation of steroid metabolic process	8	1	0.09	1
GO:1901071	glucosamine-containing compound metaboli...	6	3	0.07	1
GO:0031175	neuron projection development	96	2	1.11	1
GO:1901072	glucosamine-containing compound cataboli...	4	2	0.05	1
GO:1901073	glucosamine-containing compound biosynth...	1	1	0.01	1
GO:0006534	cysteine metabolic process	5	1	0.06	1
GO:0015031	protein transport	157	1	1.81	1
GO:0006536	glutamate metabolic process	4	1	0.05	1
GO:0045450	bicoid mRNA localization	2	1	0.02	1
GO:0045451	pole plasm oskar mRNA localization	2	1	0.02	1
GO:2000241	regulation of reproductive process	16	1	0.18	1
GO:0030201	heparan sulfate proteoglycan metabolic p...	4	1	0.05	1
GO:0051276	chromosome organization	78	2	0.9	1
GO:0030203	glycosaminoglycan metabolic process	12	1	0.14	1
GO:1901360	organic cyclic compound metabolic proces...	991	9	11.44	1
GO:0030204	chondroitin sulfate metabolic process	3	1	0.03	1
GO:0043648	dicarboxylic acid metabolic process	9	1	0.1	1
GO:1901362	organic cyclic compound biosynthetic pro...	626	4	7.23	1
GO:0035107	appendage morphogenesis	18	1	0.21	1
GO:0051338	regulation of transferase activity	59	1	0.68	1
GO:0042752	regulation of circadian rhythm	14	1	0.16	1
GO:0070727	cellular macromolecule localization	161	2	1.86	1
GO:0060255	regulation of macromolecule metabolic pr...	755	5	8.72	1
GO:0043632	modification-dependent macromolecule cat...	88	1	1.02	1
GO:0034754	cellular hormone metabolic process	22	1	0.25	1
GO:0006464	cellular protein modification process	371	3	4.28	1
GO:0032386	regulation of intracellular transport	44	1	0.51	1
GO:0032387	negative regulation of intracellular tra...	9	1	0.1	1
GO:0036211	protein modification process	371	3	4.28	1
GO:0006790	sulfur compound metabolic process	42	2	0.48	1
GO:1901800	positive regulation of proteasomal prote...	16	1	0.18	1
GO:0060341	regulation of cellular localization	72	1	0.83	1
GO:0006793	phosphorus metabolic process	252	5	2.91	1
GO:0045471	response to ethanol	28	1	0.32	1
GO:0042445	hormone metabolic process	27	1	0.31	1
GO:0071375	cellular response to peptide hormone sti...	19	1	0.22	1
GO:0006796	phosphate-containing compound metabolic ...	248	4	2.86	1
GO:0060348	bone development	17	2	0.2	1
GO:0043161	proteasome-mediated ubiquitin-dependent ...	63	1	0.73	1
GO:0060349	bone morphogenesis	7	2	0.08	1
GO:0031099	regeneration	27	1	0.31	1
GO:0051240	positive regulation of multicellular org...	120	2	1.39	1
GO:0007622	rhythmic behavior	10	1	0.12	1
GO:0051246	regulation of protein metabolic process	167	3	1.93	1
GO:0007623	circadian rhythm	22	1	0.25	1
GO:0051247	positive regulation of protein metabolic...	94	2	1.09	1
GO:0032268	regulation of cellular protein metabolic...	154	3	1.78	1
GO:0060560	developmental growth involved in morphog...	21	1	0.24	1
GO:0035295	tube development	117	1	1.35	1
GO:0060562	epithelial tube morphogenesis	34	1	0.39	1
GO:0006486	protein glycosylation	71	1	0.82	1
GO:0050890	cognition	24	1	0.28	1
GO:0034660	ncRNA metabolic process	61	2	0.7	1
GO:0044085	cellular component biogenesis	300	2	3.46	1
GO:0048598	embryonic morphogenesis	72	2	0.83	1
GO:0071310	cellular response to organic substance	154	5	1.78	1
GO:0048599	oocyte development	6	1	0.07	1
GO:0050896	response to stimulus	728	9	8.41	1
GO:0071312	cellular response to alkaloid	6	1	0.07	1
GO:0043603	cellular amide metabolic process	122	2	1.41	1
GO:0007610	behavior	63	1	0.73	1
GO:0051234	establishment of localization	434	4	5.01	1
GO:0043604	amide biosynthetic process	82	2	0.95	1
GO:0051235	maintenance of location	35	1	0.4	1
GO:0007611	learning or memory	22	1	0.25	1
GO:0007612	learning	12	1	0.14	1
GO:0007613	memory	17	1	0.2	1
GO:0034728	nucleosome organization	13	1	0.15	1
GO:1901264	carbohydrate derivative transport	8	1	0.09	1
GO:0051239	regulation of multicellular organismal p...	267	3	3.08	1
GO:0099177	regulation of trans-synaptic signaling	50	1	0.58	1
GO:0098542	defense response to other organism	82	1	0.95	1
GO:0043933	protein-containing complex organization	136	1	1.57	1
GO:0019530	taurine metabolic process	2	1	0.02	1
GO:0034654	nucleobase-containing compound biosynthe...	594	2	6.86	1
GO:0009790	embryo development	120	3	1.39	1
GO:0009791	post-embryonic development	25	3	0.29	1
GO:0019538	protein metabolic process	530	7	6.12	1
GO:0043170	macromolecule metabolic process	1320	14	15.24	1
GO:1902531	regulation of intracellular signal trans...	101	1	1.17	1
GO:1902533	positive regulation of intracellular sig...	62	1	0.72	1
GO:0009798	axis specification	19	1	0.22	1
GO:0018904	ether metabolic process	3	1	0.03	1
GO:0006694	steroid biosynthetic process	18	2	0.21	1
GO:0032270	positive regulation of cellular protein ...	89	2	1.03	1
GO:0046165	alcohol biosynthetic process	16	1	0.18	1
GO:0042745	circadian sleep/wake cycle	9	1	0.1	1
GO:0048332	mesoderm morphogenesis	9	1	0.1	1
GO:0023051	regulation of signaling	249	2	2.88	1
GO:0042749	regulation of circadian sleep/wake cycle	8	1	0.09	1
GO:0031399	regulation of protein modification proce...	89	1	1.03	1
GO:0023052	signaling	488	4	5.64	1
GO:0051493	regulation of cytoskeleton organization	35	1	0.4	1
GO:0046890	regulation of lipid biosynthetic process	8	1	0.09	1
GO:0007635	chemosensory behavior	4	1	0.05	1
GO:0048562	embryonic organ morphogenesis	30	1	0.35	1
GO:0023056	positive regulation of signaling	118	1	1.36	1
GO:0030422	production of siRNA involved in post-tra...	1	1	0.01	1
GO:0031102	neuron projection regeneration	10	1	0.12	1
GO:0048563	post-embryonic animal organ morphogenesi...	10	1	0.12	1
GO:0023057	negative regulation of signaling	84	2	0.97	1
GO:0016477	cell migration	91	1	1.05	1
GO:0031103	axon regeneration	10	1	0.12	1
GO:0048568	embryonic organ development	54	1	0.62	1
GO:0048569	post-embryonic animal organ development	12	1	0.14	1
GO:0035329	hippo signaling	5	1	0.06	1
GO:0070972	protein localization to endoplasmic reti...	5	1	0.06	1
GO:0018130	heterocycle biosynthetic process	606	2	7	1
GO:0097006	regulation of plasma lipoprotein particl...	4	1	0.05	1
GO:0022600	digestive system process	6	1	0.07	1
GO:0007163	establishment or maintenance of cell pol...	17	1	0.2	1
GO:0007165	signal transduction	445	4	5.14	1
GO:0007166	cell surface receptor signaling pathway	208	3	2.4	1
GO:0007167	enzyme linked receptor protein signaling...	86	1	0.99	1
GO:0022607	cellular component assembly	258	2	2.98	1
GO:1901564	organonitrogen compound metabolic proces...	672	12	7.76	1
GO:0007169	transmembrane receptor protein tyrosine ...	53	1	0.61	1
GO:1901565	organonitrogen compound catabolic proces...	161	5	1.86	1
GO:0035282	segmentation	21	2	0.24	1
GO:1901566	organonitrogen compound biosynthetic pro...	232	6	2.68	1
GO:0048580	regulation of post-embryonic development	2	1	0.02	1
GO:0008104	protein localization	229	2	2.64	1
GO:0048582	positive regulation of post-embryonic de...	1	1	0.01	1
GO:0090596	sensory organ morphogenesis	32	1	0.37	1
GO:0048583	regulation of response to stimulus	338	2	3.9	1
GO:0048584	positive regulation of response to stimu...	160	1	1.85	1
GO:0048585	negative regulation of response to stimu...	139	2	1.61	1
GO:0010629	negative regulation of gene expression	83	2	0.96	1
GO:0006662	glycerol ether metabolic process	3	1	0.03	1
GO:0034613	cellular protein localization	158	1	1.82	1
GO:0007154	cell communication	493	5	5.69	1
GO:0048588	developmental cell growth	21	1	0.24	1
GO:0044260	cellular macromolecule metabolic process	728	8	8.41	1
GO:0007155	cell adhesion	169	2	1.95	1
GO:0048589	developmental growth	72	1	0.83	1
GO:0044262	cellular carbohydrate metabolic process	27	1	0.31	1
GO:0007600	sensory perception	47	1	0.54	1
GO:0044264	cellular polysaccharide metabolic proces...	10	1	0.12	1
GO:0016441	post-transcriptional gene silencing	9	1	0.1	1
GO:0006725	cellular aromatic compound metabolic pro...	958	6	11.06	1
GO:0044265	cellular macromolecule catabolic process	126	1	1.45	1
GO:0044267	cellular protein metabolic process	478	5	5.52	1
GO:0035330	regulation of hippo signaling	3	1	0.03	1
GO:0070918	primary sncRNA processing	3	1	0.03	1
GO:0030431	sleep	9	1	0.1	1
GO:0006991	response to sterol depletion	3	1	0.03	1
GO:0060541	respiratory system development	16	1	0.18	1
GO:0034641	cellular nitrogen compound metabolic pro...	1030	7	11.89	1
GO:0006996	organelle organization	357	3	4.12	1
GO:0048232	male gamete generation	83	1	0.96	1
GO:0006997	nucleus organization	9	1	0.1	1
GO:0034645	cellular macromolecule biosynthetic proc...	154	4	1.78	1
GO:0062012	regulation of small molecule metabolic p...	24	1	0.28	1
GO:0045732	positive regulation of protein catabolic...	24	1	0.28	1
GO:0050877	nervous system process	96	2	1.11	1
GO:0000002	mitochondrial genome maintenance	4	0	0.05	1
GO:0000011	vacuole inheritance	1	0	0.01	1
GO:0000012	single strand break repair	1	0	0.01	1
GO:0000018	regulation of DNA recombination	12	0	0.14	1
GO:0000019	regulation of mitotic recombination	1	0	0.01	1
GO:0000027	ribosomal large subunit assembly	2	0	0.02	1
GO:0000032	cell wall mannoprotein biosynthetic proc...	3	0	0.03	1
GO:0000038	very long-chain fatty acid metabolic pro...	5	0	0.06	1
GO:0000041	transition metal ion transport	14	0	0.16	1
GO:0000045	autophagosome assembly	7	0	0.08	1
GO:0000050	urea cycle	1	0	0.01	1
GO:0000054	ribosomal subunit export from nucleus	1	0	0.01	1
GO:0000070	mitotic sister chromatid segregation	18	0	0.21	1
GO:0000075	cell cycle checkpoint signaling	13	0	0.15	1
GO:0000076	DNA replication checkpoint signaling	1	0	0.01	1
GO:0000077	DNA damage checkpoint signaling	8	0	0.09	1
GO:0000079	regulation of cyclin-dependent protein s...	2	0	0.02	1
GO:0000082	G1/S transition of mitotic cell cycle	18	0	0.21	1
GO:0000086	G2/M transition of mitotic cell cycle	10	0	0.12	1
GO:0000097	sulfur amino acid biosynthetic process	6	0	0.07	1
GO:0000101	sulfur amino acid transport	4	0	0.05	1
GO:0000122	negative regulation of transcription by ...	125	0	1.44	1
GO:0000132	establishment of mitotic spindle orienta...	5	0	0.06	1
GO:0000154	rRNA modification	5	0	0.06	1
GO:0000160	phosphorelay signal transduction system	2	0	0.02	1
GO:0000165	MAPK cascade	47	0	0.54	1
GO:0000183	rDNA heterochromatin assembly	2	0	0.02	1
GO:0000184	nuclear-transcribed mRNA catabolic proce...	2	0	0.02	1
GO:0000209	protein polyubiquitination	34	0	0.39	1
GO:0000212	meiotic spindle organization	1	0	0.01	1
GO:0000245	spliceosomal complex assembly	3	0	0.03	1
GO:0000255	allantoin metabolic process	2	0	0.02	1
GO:0000256	allantoin catabolic process	2	0	0.02	1
GO:0000266	mitochondrial fission	1	0	0.01	1
GO:0000270	peptidoglycan metabolic process	2	0	0.02	1
GO:0000278	mitotic cell cycle	114	0	1.32	1
GO:0000280	nuclear division	45	0	0.52	1
GO:0000281	mitotic cytokinesis	15	0	0.17	1
GO:0000288	nuclear-transcribed mRNA catabolic proce...	8	0	0.09	1
GO:0000289	nuclear-transcribed mRNA poly(A) tail sh...	2	0	0.02	1
GO:0000291	nuclear-transcribed mRNA catabolic proce...	7	0	0.08	1
GO:0000302	response to reactive oxygen species	16	0	0.18	1
GO:0000303	response to superoxide	1	0	0.01	1
GO:0000305	response to oxygen radical	1	0	0.01	1
GO:0000338	protein deneddylation	1	0	0.01	1
GO:0000375	RNA splicing, via transesterification re...	33	0	0.38	1
GO:0000377	RNA splicing, via transesterification re...	33	0	0.38	1
GO:0000378	RNA exon ligation	1	0	0.01	1
GO:0000380	alternative mRNA splicing, via spliceoso...	9	0	0.1	1
GO:0000381	regulation of alternative mRNA splicing,...	8	0	0.09	1
GO:0000387	spliceosomal snRNP assembly	2	0	0.02	1
GO:0000394	RNA splicing, via endonucleolytic cleava...	1	0	0.01	1
GO:0000398	mRNA splicing, via spliceosome	33	0	0.38	1
GO:0000413	protein peptidyl-prolyl isomerization	3	0	0.03	1
GO:0000422	autophagy of mitochondrion	7	0	0.08	1
GO:0000423	mitophagy	1	0	0.01	1
GO:0000455	enzyme-directed rRNA pseudouridine synth...	2	0	0.02	1
GO:0000459	exonucleolytic trimming involved in rRNA...	3	0	0.03	1
GO:0000460	maturation of 5.8S rRNA	6	0	0.07	1
GO:0000462	maturation of SSU-rRNA from tricistronic...	1	0	0.01	1
GO:0000463	maturation of LSU-rRNA from tricistronic...	1	0	0.01	1
GO:0000466	maturation of 5.8S rRNA from tricistroni...	4	0	0.05	1
GO:0000467	exonucleolytic trimming to generate matu...	3	0	0.03	1
GO:0000469	cleavage involved in rRNA processing	3	0	0.03	1
GO:0000470	maturation of LSU-rRNA	3	0	0.03	1
GO:0000712	resolution of meiotic recombination inte...	1	0	0.01	1
GO:0000715	nucleotide-excision repair, DNA damage r...	1	0	0.01	1
GO:0000717	nucleotide-excision repair, DNA duplex u...	1	0	0.01	1
GO:0000722	telomere maintenance via recombination	1	0	0.01	1
GO:0000723	telomere maintenance	11	0	0.13	1
GO:0000724	double-strand break repair via homologou...	15	0	0.17	1
GO:0000725	recombinational repair	15	0	0.17	1
GO:0000730	DNA recombinase assembly	1	0	0.01	1
GO:0000731	DNA synthesis involved in DNA repair	3	0	0.03	1
GO:0000737	DNA catabolic process, endonucleolytic	1	0	0.01	1
GO:0000768	syncytium formation by plasma membrane f...	4	0	0.05	1
GO:0000819	sister chromatid segregation	22	0	0.25	1
GO:0000820	regulation of glutamine family amino aci...	1	0	0.01	1
GO:0000910	cytokinesis	26	0	0.3	1
GO:0000956	nuclear-transcribed mRNA catabolic proce...	12	0	0.14	1
GO:0000957	mitochondrial RNA catabolic process	1	0	0.01	1
GO:0000958	mitochondrial mRNA catabolic process	1	0	0.01	1
GO:0000959	mitochondrial RNA metabolic process	7	0	0.08	1
GO:0000960	regulation of mitochondrial RNA cataboli...	1	0	0.01	1
GO:0000962	positive regulation of mitochondrial RNA...	1	0	0.01	1
GO:0000963	mitochondrial RNA processing	3	0	0.03	1
GO:0000964	mitochondrial RNA 5'-end processing	1	0	0.01	1
GO:0000965	mitochondrial RNA 3'-end processing	2	0	0.02	1
GO:0000966	RNA 5'-end processing	3	0	0.03	1
GO:0000968	tRNA exon ligation	1	0	0.01	1
GO:0000971	tRNA exon ligation utilizing 2',3' cycli...	1	0	0.01	1
GO:0000972	transcription-dependent tethering of RNA...	2	0	0.02	1
GO:0001101	response to acid chemical	12	0	0.14	1
GO:0001171	reverse transcription	2	0	0.02	1
GO:0001408	guanine nucleotide transport	2	0	0.02	1
GO:0001502	cartilage condensation	2	0	0.02	1
GO:0001504	neurotransmitter uptake	4	0	0.05	1
GO:0001505	regulation of neurotransmitter levels	22	0	0.25	1
GO:0001507	acetylcholine catabolic process in synap...	1	0	0.01	1
GO:0001508	action potential	23	0	0.27	1
GO:0001510	RNA methylation	9	0	0.1	1
GO:0001516	prostaglandin biosynthetic process	2	0	0.02	1
GO:0001522	pseudouridine synthesis	5	0	0.06	1
GO:0001523	retinoid metabolic process	13	0	0.15	1
GO:0001525	angiogenesis	68	0	0.79	1
GO:0001539	cilium or flagellum-dependent cell motil...	18	0	0.21	1
GO:0001541	ovarian follicle development	6	0	0.07	1
GO:0001542	ovulation from ovarian follicle	1	0	0.01	1
GO:0001547	antral ovarian follicle growth	1	0	0.01	1
GO:0001550	ovarian cumulus expansion	1	0	0.01	1
GO:0001552	ovarian follicle atresia	1	0	0.01	1
GO:0001554	luteolysis	1	0	0.01	1
GO:0001556	oocyte maturation	3	0	0.03	1
GO:0001558	regulation of cell growth	32	0	0.37	1
GO:0001561	fatty acid alpha-oxidation	2	0	0.02	1
GO:0001568	blood vessel development	82	0	0.95	1
GO:0001569	branching involved in blood vessel morph...	2	0	0.02	1
GO:0001570	vasculogenesis	7	0	0.08	1
GO:0001573	ganglioside metabolic process	4	0	0.05	1
GO:0001574	ganglioside biosynthetic process	1	0	0.01	1
GO:0001578	microtubule bundle formation	18	0	0.21	1
GO:0001649	osteoblast differentiation	9	0	0.1	1
GO:0001654	eye development	40	0	0.46	1
GO:0001656	metanephros development	5	0	0.06	1
GO:0001657	ureteric bud development	3	0	0.03	1
GO:0001658	branching involved in ureteric bud morph...	3	0	0.03	1
GO:0001659	temperature homeostasis	12	0	0.14	1
GO:0001661	conditioned taste aversion	1	0	0.01	1
GO:0001662	behavioral fear response	1	0	0.01	1
GO:0001675	acrosome assembly	1	0	0.01	1
GO:0001676	long-chain fatty acid metabolic process	7	0	0.08	1
GO:0001678	cellular glucose homeostasis	6	0	0.07	1
GO:0001680	tRNA 3'-terminal CCA addition	1	0	0.01	1
GO:0001682	tRNA 5'-leader removal	2	0	0.02	1
GO:0001696	gastric acid secretion	1	0	0.01	1
GO:0001697	histamine-induced gastric acid secretion	1	0	0.01	1
GO:0001698	gastrin-induced gastric acid secretion	1	0	0.01	1
GO:0001700	embryonic development via the syncytial ...	2	0	0.02	1
GO:0001701	in utero embryonic development	53	0	0.61	1
GO:0001706	endoderm formation	7	0	0.08	1
GO:0001708	cell fate specification	11	0	0.13	1
GO:0001709	cell fate determination	10	0	0.12	1
GO:0001710	mesodermal cell fate commitment	2	0	0.02	1
GO:0001711	endodermal cell fate commitment	2	0	0.02	1
GO:0001714	endodermal cell fate specification	1	0	0.01	1
GO:0001731	formation of translation preinitiation c...	1	0	0.01	1
GO:0001732	formation of cytoplasmic translation ini...	4	0	0.05	1
GO:0001736	establishment of planar polarity	4	0	0.05	1
GO:0001738	morphogenesis of a polarized epithelium	4	0	0.05	1
GO:0001745	compound eye morphogenesis	4	0	0.05	1
GO:0001751	compound eye photoreceptor cell differen...	4	0	0.05	1
GO:0001752	compound eye photoreceptor fate commitme...	1	0	0.01	1
GO:0001754	eye photoreceptor cell differentiation	9	0	0.1	1
GO:0001755	neural crest cell migration	3	0	0.03	1
GO:0001756	somitogenesis	14	0	0.16	1
GO:0001759	organ induction	1	0	0.01	1
GO:0001763	morphogenesis of a branching structure	10	0	0.12	1
GO:0001764	neuron migration	10	0	0.12	1
GO:0001765	membrane raft assembly	1	0	0.01	1
GO:0001771	immunological synapse formation	1	0	0.01	1
GO:0001773	myeloid dendritic cell activation	5	0	0.06	1
GO:0001774	microglial cell activation	7	0	0.08	1
GO:0001775	cell activation	96	0	1.11	1
GO:0001776	leukocyte homeostasis	2	0	0.02	1
GO:0001778	plasma membrane repair	1	0	0.01	1
GO:0001780	neutrophil homeostasis	2	0	0.02	1
GO:0001781	neutrophil apoptotic process	1	0	0.01	1
GO:0001783	B cell apoptotic process	1	0	0.01	1
GO:0001818	negative regulation of cytokine producti...	17	0	0.2	1
GO:0001821	histamine secretion	1	0	0.01	1
GO:0001823	mesonephros development	3	0	0.03	1
GO:0001824	blastocyst development	7	0	0.08	1
GO:0001825	blastocyst formation	2	0	0.02	1
GO:0001832	blastocyst growth	1	0	0.01	1
GO:0001833	inner cell mass cell proliferation	1	0	0.01	1
GO:0001835	blastocyst hatching	1	0	0.01	1
GO:0001836	release of cytochrome c from mitochondri...	1	0	0.01	1
GO:0001837	epithelial to mesenchymal transition	11	0	0.13	1
GO:0001838	embryonic epithelial tube formation	12	0	0.14	1
GO:0001841	neural tube formation	11	0	0.13	1
GO:0001843	neural tube closure	10	0	0.12	1
GO:0001845	phagolysosome assembly	1	0	0.01	1
GO:0001865	NK T cell differentiation	1	0	0.01	1
GO:0001867	complement activation, lectin pathway	16	0	0.18	1
GO:0001881	receptor recycling	3	0	0.03	1
GO:0001885	endothelial cell development	9	0	0.1	1
GO:0001889	liver development	17	0	0.2	1
GO:0001890	placenta development	29	0	0.33	1
GO:0001892	embryonic placenta development	21	0	0.24	1
GO:0001893	maternal placenta development	2	0	0.02	1
GO:0001894	tissue homeostasis	12	0	0.14	1
GO:0001895	retina homeostasis	3	0	0.03	1
GO:0001906	cell killing	3	0	0.03	1
GO:0001909	leukocyte mediated cytotoxicity	3	0	0.03	1
GO:0001910	regulation of leukocyte mediated cytotox...	1	0	0.01	1
GO:0001912	positive regulation of leukocyte mediate...	1	0	0.01	1
GO:0001913	T cell mediated cytotoxicity	2	0	0.02	1
GO:0001914	regulation of T cell mediated cytotoxici...	1	0	0.01	1
GO:0001916	positive regulation of T cell mediated c...	1	0	0.01	1
GO:0001919	regulation of receptor recycling	3	0	0.03	1
GO:0001933	negative regulation of protein phosphory...	18	0	0.21	1
GO:0001935	endothelial cell proliferation	11	0	0.13	1
GO:0001936	regulation of endothelial cell prolifera...	11	0	0.13	1
GO:0001937	negative regulation of endothelial cell ...	4	0	0.05	1
GO:0001938	positive regulation of endothelial cell ...	6	0	0.07	1
GO:0001941	postsynaptic membrane organization	2	0	0.02	1
GO:0001942	hair follicle development	2	0	0.02	1
GO:0001944	vasculature development	84	0	0.97	1
GO:0001945	lymph vessel development	3	0	0.03	1
GO:0001946	lymphangiogenesis	1	0	0.01	1
GO:0001947	heart looping	11	0	0.13	1
GO:0001952	regulation of cell-matrix adhesion	5	0	0.06	1
GO:0001954	positive regulation of cell-matrix adhes...	4	0	0.05	1
GO:0001955	blood vessel maturation	1	0	0.01	1
GO:0001956	positive regulation of neurotransmitter ...	2	0	0.02	1
GO:0001959	regulation of cytokine-mediated signalin...	5	0	0.06	1
GO:0001960	negative regulation of cytokine-mediated...	3	0	0.03	1
GO:0001961	positive regulation of cytokine-mediated...	2	0	0.02	1
GO:0001963	synaptic transmission, dopaminergic	4	0	0.05	1
GO:0001964	startle response	3	0	0.03	1
GO:0001973	G protein-coupled adenosine receptor sig...	1	0	0.01	1
GO:0001974	blood vessel remodeling	2	0	0.02	1
GO:0001975	response to amphetamine	2	0	0.02	1
GO:0001976	nervous system process involved in regul...	1	0	0.01	1
GO:0001978	regulation of systemic arterial blood pr...	1	0	0.01	1
GO:0001982	baroreceptor response to decreased syste...	1	0	0.01	1
GO:0001988	positive regulation of heart rate involv...	1	0	0.01	1
GO:0002011	morphogenesis of an epithelial sheet	7	0	0.08	1
GO:0002021	response to dietary excess	1	0	0.01	1
GO:0002026	regulation of the force of heart contrac...	2	0	0.02	1
GO:0002027	regulation of heart rate	10	0	0.12	1
GO:0002028	regulation of sodium ion transport	13	0	0.15	1
GO:0002036	regulation of L-glutamate import across ...	1	0	0.01	1
GO:0002040	sprouting angiogenesis	11	0	0.13	1
GO:0002042	cell migration involved in sprouting ang...	4	0	0.05	1
GO:0002043	blood vessel endothelial cell proliferat...	1	0	0.01	1
GO:0002052	positive regulation of neuroblast prolif...	4	0	0.05	1
GO:0002062	chondrocyte differentiation	4	0	0.05	1
GO:0002063	chondrocyte development	2	0	0.02	1
GO:0002064	epithelial cell development	36	0	0.42	1
GO:0002065	columnar/cuboidal epithelial cell differ...	6	0	0.07	1
GO:0002066	columnar/cuboidal epithelial cell develo...	5	0	0.06	1
GO:0002067	glandular epithelial cell differentiatio...	5	0	0.06	1
GO:0002068	glandular epithelial cell development	4	0	0.05	1
GO:0002069	columnar/cuboidal epithelial cell matura...	1	0	0.01	1
GO:0002070	epithelial cell maturation	3	0	0.03	1
GO:0002076	osteoblast development	2	0	0.02	1
GO:0002084	protein depalmitoylation	2	0	0.02	1
GO:0002088	lens development in camera-type eye	7	0	0.08	1
GO:0002089	lens morphogenesis in camera-type eye	4	0	0.05	1
GO:0002090	regulation of receptor internalization	8	0	0.09	1
GO:0002091	negative regulation of receptor internal...	3	0	0.03	1
GO:0002092	positive regulation of receptor internal...	4	0	0.05	1
GO:0002093	auditory receptor cell morphogenesis	1	0	0.01	1
GO:0002097	tRNA wobble base modification	4	0	0.05	1
GO:0002098	tRNA wobble uridine modification	2	0	0.02	1
GO:0002100	tRNA wobble adenosine to inosine editing	1	0	0.01	1
GO:0002101	tRNA wobble cytosine modification	1	0	0.01	1
GO:0002115	store-operated calcium entry	2	0	0.02	1
GO:0002118	aggressive behavior	1	0	0.01	1
GO:0002125	maternal aggressive behavior	1	0	0.01	1
GO:0002138	retinoic acid biosynthetic process	1	0	0.01	1
GO:0002158	osteoclast proliferation	2	0	0.02	1
GO:0002175	protein localization to paranode region ...	2	0	0.02	1
GO:0002176	male germ cell proliferation	2	0	0.02	1
GO:0002181	cytoplasmic translation	10	0	0.12	1
GO:0002182	cytoplasmic translational elongation	1	0	0.01	1
GO:0002183	cytoplasmic translational initiation	5	0	0.06	1
GO:0002200	somatic diversification of immune recept...	7	0	0.08	1
GO:0002204	somatic recombination of immunoglobulin ...	5	0	0.06	1
GO:0002208	somatic diversification of immunoglobuli...	5	0	0.06	1
GO:0002209	behavioral defense response	1	0	0.01	1
GO:0002213	defense response to insect	1	0	0.01	1
GO:0002218	activation of innate immune response	12	0	0.14	1
GO:0002220	innate immune response activating cell s...	9	0	0.1	1
GO:0002221	pattern recognition receptor signaling p...	44	0	0.51	1
GO:0002224	toll-like receptor signaling pathway	31	0	0.36	1
GO:0002228	natural killer cell mediated immunity	2	0	0.02	1
GO:0002230	positive regulation of defense response ...	1	0	0.01	1
GO:0002237	response to molecule of bacterial origin	31	0	0.36	1
GO:0002244	hematopoietic progenitor cell differenti...	12	0	0.14	1
GO:0002250	adaptive immune response	16	0	0.18	1
GO:0002252	immune effector process	88	0	1.02	1
GO:0002253	activation of immune response	30	0	0.35	1
GO:0002262	myeloid cell homeostasis	11	0	0.13	1
GO:0002263	cell activation involved in immune respo...	58	0	0.67	1
GO:0002265	astrocyte activation involved in immune ...	1	0	0.01	1
GO:0002269	leukocyte activation involved in inflamm...	7	0	0.08	1
GO:0002270	plasmacytoid dendritic cell activation	1	0	0.01	1
GO:0002274	myeloid leukocyte activation	20	0	0.23	1
GO:0002275	myeloid cell activation involved in immu...	10	0	0.12	1
GO:0002278	eosinophil activation involved in immune...	1	0	0.01	1
GO:0002279	mast cell activation involved in immune ...	1	0	0.01	1
GO:0002281	macrophage activation involved in immune...	2	0	0.02	1
GO:0002282	microglial cell activation involved in i...	1	0	0.01	1
GO:0002283	neutrophil activation involved in immune...	10	0	0.12	1
GO:0002285	lymphocyte activation involved in immune...	50	0	0.58	1
GO:0002286	T cell activation involved in immune res...	40	0	0.46	1
GO:0002287	alpha-beta T cell activation involved in...	38	0	0.44	1
GO:0002291	T cell activation via T cell receptor co...	1	0	0.01	1
GO:0002292	T cell differentiation involved in immun...	38	0	0.44	1
GO:0002293	alpha-beta T cell differentiation involv...	38	0	0.44	1
GO:0002294	CD4-positive, alpha-beta T cell differen...	38	0	0.44	1
GO:0002312	B cell activation involved in immune res...	9	0	0.1	1
GO:0002313	mature B cell differentiation involved i...	4	0	0.05	1
GO:0002315	marginal zone B cell differentiation	4	0	0.05	1
GO:0002320	lymphoid progenitor cell differentiation	3	0	0.03	1
GO:0002323	natural killer cell activation involved ...	2	0	0.02	1
GO:0002328	pro-B cell differentiation	2	0	0.02	1
GO:0002335	mature B cell differentiation	4	0	0.05	1
GO:0002347	response to tumor cell	1	0	0.01	1
GO:0002349	histamine production involved in inflamm...	1	0	0.01	1
GO:0002366	leukocyte activation involved in immune ...	58	0	0.67	1
GO:0002367	cytokine production involved in immune r...	3	0	0.03	1
GO:0002369	T cell cytokine production	2	0	0.02	1
GO:0002377	immunoglobulin production	7	0	0.08	1
GO:0002381	immunoglobulin production involved in im...	5	0	0.06	1
GO:0002407	dendritic cell chemotaxis	1	0	0.01	1
GO:0002418	immune response to tumor cell	1	0	0.01	1
GO:0002424	T cell mediated immune response to tumor...	1	0	0.01	1
GO:0002429	immune response-activating cell surface ...	19	0	0.22	1
GO:0002431	Fc receptor mediated stimulatory signali...	3	0	0.03	1
GO:0002433	immune response-regulating cell surface ...	3	0	0.03	1
GO:0002437	inflammatory response to antigenic stimu...	49	0	0.57	1
GO:0002438	acute inflammatory response to antigenic...	1	0	0.01	1
GO:0002440	production of molecular mediator of immu...	12	0	0.14	1
GO:0002441	histamine secretion involved in inflamma...	1	0	0.01	1
GO:0002443	leukocyte mediated immunity	21	0	0.24	1
GO:0002444	myeloid leukocyte mediated immunity	11	0	0.13	1
GO:0002446	neutrophil mediated immunity	11	0	0.13	1
GO:0002447	eosinophil mediated immunity	1	0	0.01	1
GO:0002448	mast cell mediated immunity	1	0	0.01	1
GO:0002449	lymphocyte mediated immunity	11	0	0.13	1
GO:0002455	humoral immune response mediated by circ...	1	0	0.01	1
GO:0002456	T cell mediated immunity	5	0	0.06	1
GO:0002460	adaptive immune response based on somati...	11	0	0.13	1
GO:0002474	antigen processing and presentation of p...	1	0	0.01	1
GO:0002475	antigen processing and presentation via ...	1	0	0.01	1
GO:0002478	antigen processing and presentation of e...	1	0	0.01	1
GO:0002483	antigen processing and presentation of e...	1	0	0.01	1
GO:0002495	antigen processing and presentation of p...	1	0	0.01	1
GO:0002504	antigen processing and presentation of p...	1	0	0.01	1
GO:0002507	tolerance induction	1	0	0.01	1
GO:0002520	immune system development	102	0	1.18	1
GO:0002521	leukocyte differentiation	61	0	0.7	1
GO:0002525	acute inflammatory response to non-antig...	1	0	0.01	1
GO:0002526	acute inflammatory response	3	0	0.03	1
GO:0002534	cytokine production involved in inflamma...	1	0	0.01	1
GO:0002536	respiratory burst involved in inflammato...	2	0	0.02	1
GO:0002548	monocyte chemotaxis	2	0	0.02	1
GO:0002553	histamine secretion by mast cell	1	0	0.01	1
GO:0002562	somatic diversification of immune recept...	7	0	0.08	1
GO:0002573	myeloid leukocyte differentiation	14	0	0.16	1
GO:0002576	platelet degranulation	3	0	0.03	1
GO:0002637	regulation of immunoglobulin production	6	0	0.07	1
GO:0002638	negative regulation of immunoglobulin pr...	2	0	0.02	1
GO:0002639	positive regulation of immunoglobulin pr...	4	0	0.05	1
GO:0002643	regulation of tolerance induction	1	0	0.01	1
GO:0002679	respiratory burst involved in defense re...	2	0	0.02	1
GO:0002682	regulation of immune system process	160	0	1.85	1
GO:0002683	negative regulation of immune system pro...	61	0	0.7	1
GO:0002684	positive regulation of immune system pro...	56	0	0.65	1
GO:0002685	regulation of leukocyte migration	9	0	0.1	1
GO:0002686	negative regulation of leukocyte migrati...	1	0	0.01	1
GO:0002687	positive regulation of leukocyte migrati...	5	0	0.06	1
GO:0002688	regulation of leukocyte chemotaxis	4	0	0.05	1
GO:0002690	positive regulation of leukocyte chemota...	3	0	0.03	1
GO:0002691	regulation of cellular extravasation	2	0	0.02	1
GO:0002692	negative regulation of cellular extravas...	1	0	0.01	1
GO:0002694	regulation of leukocyte activation	62	0	0.72	1
GO:0002695	negative regulation of leukocyte activat...	46	0	0.53	1
GO:0002696	positive regulation of leukocyte activat...	16	0	0.18	1
GO:0002697	regulation of immune effector process	55	0	0.64	1
GO:0002698	negative regulation of immune effector p...	44	0	0.51	1
GO:0002699	positive regulation of immune effector p...	10	0	0.12	1
GO:0002700	regulation of production of molecular me...	11	0	0.13	1
GO:0002701	negative regulation of production of mol...	5	0	0.06	1
GO:0002702	positive regulation of production of mol...	6	0	0.07	1
GO:0002703	regulation of leukocyte mediated immunit...	10	0	0.12	1
GO:0002704	negative regulation of leukocyte mediate...	2	0	0.02	1
GO:0002705	positive regulation of leukocyte mediate...	6	0	0.07	1
GO:0002706	regulation of lymphocyte mediated immuni...	9	0	0.1	1
GO:0002707	negative regulation of lymphocyte mediat...	2	0	0.02	1
GO:0002708	positive regulation of lymphocyte mediat...	6	0	0.07	1
GO:0002709	regulation of T cell mediated immunity	4	0	0.05	1
GO:0002711	positive regulation of T cell mediated i...	3	0	0.03	1
GO:0002712	regulation of B cell mediated immunity	5	0	0.06	1
GO:0002713	negative regulation of B cell mediated i...	2	0	0.02	1
GO:0002714	positive regulation of B cell mediated i...	3	0	0.03	1
GO:0002718	regulation of cytokine production involv...	3	0	0.03	1
GO:0002719	negative regulation of cytokine producti...	1	0	0.01	1
GO:0002720	positive regulation of cytokine producti...	2	0	0.02	1
GO:0002724	regulation of T cell cytokine production	2	0	0.02	1
GO:0002726	positive regulation of T cell cytokine p...	2	0	0.02	1
GO:0002752	cell surface pattern recognition recepto...	9	0	0.1	1
GO:0002753	cytoplasmic pattern recognition receptor...	4	0	0.05	1
GO:0002755	MyD88-dependent toll-like receptor signa...	19	0	0.22	1
GO:0002756	MyD88-independent toll-like receptor sig...	1	0	0.01	1
GO:0002757	immune response-activating signal transd...	19	0	0.22	1
GO:0002758	innate immune response-activating signal...	9	0	0.1	1
GO:0002759	regulation of antimicrobial humoral resp...	2	0	0.02	1
GO:0002761	regulation of myeloid leukocyte differen...	9	0	0.1	1
GO:0002762	negative regulation of myeloid leukocyte...	1	0	0.01	1
GO:0002763	positive regulation of myeloid leukocyte...	7	0	0.08	1
GO:0002764	immune response-regulating signaling pat...	57	0	0.66	1
GO:0002768	immune response-regulating cell surface ...	20	0	0.23	1
GO:0002775	antimicrobial peptide production	2	0	0.02	1
GO:0002777	antimicrobial peptide biosynthetic proce...	1	0	0.01	1
GO:0002778	antibacterial peptide production	1	0	0.01	1
GO:0002780	antibacterial peptide biosynthetic proce...	1	0	0.01	1
GO:0002781	antifungal peptide production	1	0	0.01	1
GO:0002784	regulation of antimicrobial peptide prod...	2	0	0.02	1
GO:0002785	negative regulation of antimicrobial pep...	2	0	0.02	1
GO:0002786	regulation of antibacterial peptide prod...	1	0	0.01	1
GO:0002787	negative regulation of antibacterial pep...	1	0	0.01	1
GO:0002788	regulation of antifungal peptide product...	1	0	0.01	1
GO:0002789	negative regulation of antifungal peptid...	1	0	0.01	1
GO:0002790	peptide secretion	12	0	0.14	1
GO:0002791	regulation of peptide secretion	11	0	0.13	1
GO:0002792	negative regulation of peptide secretion	1	0	0.01	1
GO:0002793	positive regulation of peptide secretion	5	0	0.06	1
GO:0002805	regulation of antimicrobial peptide bios...	1	0	0.01	1
GO:0002806	negative regulation of antimicrobial pep...	1	0	0.01	1
GO:0002808	regulation of antibacterial peptide bios...	1	0	0.01	1
GO:0002809	negative regulation of antibacterial pep...	1	0	0.01	1
GO:0002812	biosynthetic process of antibacterial pe...	1	0	0.01	1
GO:0002813	regulation of biosynthetic process of an...	1	0	0.01	1
GO:0002814	negative regulation of biosynthetic proc...	1	0	0.01	1
GO:0002819	regulation of adaptive immune response	10	0	0.12	1
GO:0002820	negative regulation of adaptive immune r...	2	0	0.02	1
GO:0002821	positive regulation of adaptive immune r...	6	0	0.07	1
GO:0002822	regulation of adaptive immune response b...	9	0	0.1	1
GO:0002823	negative regulation of adaptive immune r...	2	0	0.02	1
GO:0002824	positive regulation of adaptive immune r...	6	0	0.07	1
GO:0002828	regulation of type 2 immune response	39	0	0.45	1
GO:0002829	negative regulation of type 2 immune res...	37	0	0.43	1
GO:0002830	positive regulation of type 2 immune res...	2	0	0.02	1
GO:0002831	regulation of response to biotic stimulu...	21	0	0.24	1
GO:0002832	negative regulation of response to bioti...	7	0	0.08	1
GO:0002833	positive regulation of response to bioti...	15	0	0.17	1
GO:0002834	regulation of response to tumor cell	1	0	0.01	1
GO:0002837	regulation of immune response to tumor c...	1	0	0.01	1
GO:0002840	regulation of T cell mediated immune res...	1	0	0.01	1
GO:0002861	regulation of inflammatory response to a...	4	0	0.05	1
GO:0002862	negative regulation of inflammatory resp...	3	0	0.03	1
GO:0002863	positive regulation of inflammatory resp...	1	0	0.01	1
GO:0002886	regulation of myeloid leukocyte mediated...	1	0	0.01	1
GO:0002889	regulation of immunoglobulin mediated im...	5	0	0.06	1
GO:0002890	negative regulation of immunoglobulin me...	2	0	0.02	1
GO:0002891	positive regulation of immunoglobulin me...	3	0	0.03	1
GO:0002902	regulation of B cell apoptotic process	1	0	0.01	1
GO:0002903	negative regulation of B cell apoptotic ...	1	0	0.01	1
GO:0002920	regulation of humoral immune response	3	0	0.03	1
GO:0002921	negative regulation of humoral immune re...	2	0	0.02	1
GO:0002922	positive regulation of humoral immune re...	1	0	0.01	1
GO:0002930	trabecular meshwork development	1	0	0.01	1
GO:0002931	response to ischemia	6	0	0.07	1
GO:0002939	tRNA N1-guanine methylation	1	0	0.01	1
GO:0003007	heart morphogenesis	35	0	0.4	1
GO:0003009	skeletal muscle contraction	2	0	0.02	1
GO:0003012	muscle system process	37	0	0.43	1
GO:0003013	circulatory system process	50	0	0.58	1
GO:0003014	renal system process	12	0	0.14	1
GO:0003015	heart process	28	0	0.32	1
GO:0003016	respiratory system process	1	0	0.01	1
GO:0003017	lymph circulation	2	0	0.02	1
GO:0003018	vascular process in circulatory system	17	0	0.2	1
GO:0003025	regulation of systemic arterial blood pr...	1	0	0.01	1
GO:0003056	regulation of vascular associated smooth...	1	0	0.01	1
GO:0003057	regulation of the force of heart contrac...	1	0	0.01	1
GO:0003073	regulation of systemic arterial blood pr...	3	0	0.03	1
GO:0003084	positive regulation of systemic arterial...	1	0	0.01	1
GO:0003091	renal water homeostasis	2	0	0.02	1
GO:0003128	heart field specification	4	0	0.05	1
GO:0003129	heart induction	1	0	0.01	1
GO:0003130	BMP signaling pathway involved in heart ...	1	0	0.01	1
GO:0003133	endodermal-mesodermal cell signaling	1	0	0.01	1
GO:0003134	endodermal-mesodermal cell signaling inv...	1	0	0.01	1
GO:0003139	secondary heart field specification	4	0	0.05	1
GO:0003140	determination of left/right asymmetry in...	1	0	0.01	1
GO:0003143	embryonic heart tube morphogenesis	12	0	0.14	1
GO:0003144	embryonic heart tube formation	1	0	0.01	1
GO:0003148	outflow tract septum morphogenesis	6	0	0.07	1
GO:0003149	membranous septum morphogenesis	1	0	0.01	1
GO:0003151	outflow tract morphogenesis	10	0	0.12	1
GO:0003156	regulation of animal organ formation	1	0	0.01	1
GO:0003157	endocardium development	1	0	0.01	1
GO:0003158	endothelium development	13	0	0.15	1
GO:0003159	morphogenesis of an endothelium	1	0	0.01	1
GO:0003160	endocardium morphogenesis	1	0	0.01	1
GO:0003161	cardiac conduction system development	4	0	0.05	1
GO:0003162	atrioventricular node development	3	0	0.03	1
GO:0003163	sinoatrial node development	1	0	0.01	1
GO:0003169	coronary vein morphogenesis	1	0	0.01	1
GO:0003170	heart valve development	10	0	0.12	1
GO:0003171	atrioventricular valve development	3	0	0.03	1
GO:0003174	mitral valve development	1	0	0.01	1
GO:0003175	tricuspid valve development	1	0	0.01	1
GO:0003176	aortic valve development	3	0	0.03	1
GO:0003177	pulmonary valve development	7	0	0.08	1
GO:0003178	coronary sinus valve development	1	0	0.01	1
GO:0003179	heart valve morphogenesis	8	0	0.09	1
GO:0003180	aortic valve morphogenesis	3	0	0.03	1
GO:0003181	atrioventricular valve morphogenesis	2	0	0.02	1
GO:0003182	coronary sinus valve morphogenesis	1	0	0.01	1
GO:0003183	mitral valve morphogenesis	1	0	0.01	1
GO:0003184	pulmonary valve morphogenesis	7	0	0.08	1
GO:0003188	heart valve formation	3	0	0.03	1
GO:0003190	atrioventricular valve formation	2	0	0.02	1
GO:0003192	mitral valve formation	1	0	0.01	1
GO:0003193	pulmonary valve formation	1	0	0.01	1
GO:0003197	endocardial cushion development	4	0	0.05	1
GO:0003198	epithelial to mesenchymal transition inv...	2	0	0.02	1
GO:0003203	endocardial cushion morphogenesis	3	0	0.03	1
GO:0003205	cardiac chamber development	20	0	0.23	1
GO:0003206	cardiac chamber morphogenesis	15	0	0.17	1
GO:0003207	cardiac chamber formation	2	0	0.02	1
GO:0003208	cardiac ventricle morphogenesis	8	0	0.09	1
GO:0003209	cardiac atrium morphogenesis	6	0	0.07	1
GO:0003211	cardiac ventricle formation	1	0	0.01	1
GO:0003213	cardiac right atrium morphogenesis	1	0	0.01	1
GO:0003214	cardiac left ventricle morphogenesis	2	0	0.02	1
GO:0003215	cardiac right ventricle morphogenesis	2	0	0.02	1
GO:0003219	cardiac right ventricle formation	1	0	0.01	1
GO:0003222	ventricular trabecula myocardium morphog...	2	0	0.02	1
GO:0003223	ventricular compact myocardium morphogen...	4	0	0.05	1
GO:0003228	atrial cardiac muscle tissue development	1	0	0.01	1
GO:0003229	ventricular cardiac muscle tissue develo...	6	0	0.07	1
GO:0003230	cardiac atrium development	7	0	0.08	1
GO:0003231	cardiac ventricle development	13	0	0.15	1
GO:0003241	growth involved in heart morphogenesis	1	0	0.01	1
GO:0003249	cell proliferation involved in heart val...	1	0	0.01	1
GO:0003250	regulation of cell proliferation involve...	1	0	0.01	1
GO:0003252	negative regulation of cell proliferatio...	1	0	0.01	1
GO:0003253	cardiac neural crest cell migration invo...	1	0	0.01	1
GO:0003254	regulation of membrane depolarization	8	0	0.09	1
GO:0003263	cardioblast proliferation	2	0	0.02	1
GO:0003264	regulation of cardioblast proliferation	2	0	0.02	1
GO:0003266	regulation of secondary heart field card...	2	0	0.02	1
GO:0003270	Notch signaling pathway involved in regu...	1	0	0.01	1
GO:0003272	endocardial cushion formation	3	0	0.03	1
GO:0003273	cell migration involved in endocardial c...	1	0	0.01	1
GO:0003279	cardiac septum development	16	0	0.18	1
GO:0003281	ventricular septum development	9	0	0.1	1
GO:0003283	atrial septum development	6	0	0.07	1
GO:0003298	physiological muscle hypertrophy	4	0	0.05	1
GO:0003300	cardiac muscle hypertrophy	16	0	0.18	1
GO:0003301	physiological cardiac muscle hypertrophy	4	0	0.05	1
GO:0003309	type B pancreatic cell differentiation	4	0	0.05	1
GO:0003310	pancreatic A cell differentiation	2	0	0.02	1
GO:0003312	pancreatic PP cell differentiation	1	0	0.01	1
GO:0003313	heart rudiment development	1	0	0.01	1
GO:0003314	heart rudiment morphogenesis	1	0	0.01	1
GO:0003315	heart rudiment formation	1	0	0.01	1
GO:0003318	cell migration to the midline involved i...	1	0	0.01	1
GO:0003319	cardioblast migration to the midline inv...	1	0	0.01	1
GO:0003322	pancreatic A cell development	1	0	0.01	1
GO:0003323	type B pancreatic cell development	3	0	0.03	1
GO:0003326	pancreatic A cell fate commitment	1	0	0.01	1
GO:0003327	type B pancreatic cell fate commitment	1	0	0.01	1
GO:0003329	pancreatic PP cell fate commitment	1	0	0.01	1
GO:0003330	regulation of extracellular matrix const...	1	0	0.01	1
GO:0003332	negative regulation of extracellular mat...	1	0	0.01	1
GO:0003333	amino acid transmembrane transport	11	0	0.13	1
GO:0003337	mesenchymal to epithelial transition inv...	1	0	0.01	1
GO:0003338	metanephros morphogenesis	1	0	0.01	1
GO:0003341	cilium movement	22	0	0.25	1
GO:0003342	proepicardium development	1	0	0.01	1
GO:0003343	septum transversum development	1	0	0.01	1
GO:0003344	pericardium morphogenesis	2	0	0.02	1
GO:0003348	cardiac endothelial cell differentiation	1	0	0.01	1
GO:0003351	epithelial cilium movement involved in e...	1	0	0.01	1
GO:0003352	regulation of cilium movement	3	0	0.03	1
GO:0003356	regulation of cilium beat frequency	2	0	0.02	1
GO:0003382	epithelial cell morphogenesis	1	0	0.01	1
GO:0003401	axis elongation	3	0	0.03	1
GO:0003404	optic vesicle morphogenesis	1	0	0.01	1
GO:0003407	neural retina development	8	0	0.09	1
GO:0005513	detection of calcium ion	1	0	0.01	1
GO:0005977	glycogen metabolic process	7	0	0.08	1
GO:0005978	glycogen biosynthetic process	3	0	0.03	1
GO:0005979	regulation of glycogen biosynthetic proc...	2	0	0.02	1
GO:0005980	glycogen catabolic process	3	0	0.03	1
GO:0005981	regulation of glycogen catabolic process	1	0	0.01	1
GO:0005984	disaccharide metabolic process	1	0	0.01	1
GO:0005991	trehalose metabolic process	1	0	0.01	1
GO:0005993	trehalose catabolic process	1	0	0.01	1
GO:0006002	fructose 6-phosphate metabolic process	1	0	0.01	1
GO:0006004	fucose metabolic process	1	0	0.01	1
GO:0006006	glucose metabolic process	11	0	0.13	1
GO:0006013	mannose metabolic process	1	0	0.01	1
GO:0006014	D-ribose metabolic process	2	0	0.02	1
GO:0006020	inositol metabolic process	3	0	0.03	1
GO:0006021	inositol biosynthetic process	1	0	0.01	1
GO:0006027	glycosaminoglycan catabolic process	2	0	0.02	1
GO:0006041	glucosamine metabolic process	1	0	0.01	1
GO:0006054	N-acetylneuraminate metabolic process	1	0	0.01	1
GO:0006056	mannoprotein metabolic process	3	0	0.03	1
GO:0006057	mannoprotein biosynthetic process	3	0	0.03	1
GO:0006059	hexitol metabolic process	1	0	0.01	1
GO:0006060	sorbitol metabolic process	1	0	0.01	1
GO:0006061	sorbitol biosynthetic process	1	0	0.01	1
GO:0006063	uronic acid metabolic process	4	0	0.05	1
GO:0006071	glycerol metabolic process	5	0	0.06	1
GO:0006072	glycerol-3-phosphate metabolic process	2	0	0.02	1
GO:0006073	cellular glucan metabolic process	7	0	0.08	1
GO:0006081	cellular aldehyde metabolic process	9	0	0.1	1
GO:0006083	acetate metabolic process	2	0	0.02	1
GO:0006084	acetyl-CoA metabolic process	5	0	0.06	1
GO:0006085	acetyl-CoA biosynthetic process	2	0	0.02	1
GO:0006089	lactate metabolic process	1	0	0.01	1
GO:0006090	pyruvate metabolic process	14	0	0.16	1
GO:0006091	generation of precursor metabolites and ...	46	0	0.53	1
GO:0006094	gluconeogenesis	6	0	0.07	1
GO:0006096	glycolytic process	12	0	0.14	1
GO:0006098	pentose-phosphate shunt	3	0	0.03	1
GO:0006099	tricarboxylic acid cycle	4	0	0.05	1
GO:0006101	citrate metabolic process	2	0	0.02	1
GO:0006103	2-oxoglutarate metabolic process	1	0	0.01	1
GO:0006104	succinyl-CoA metabolic process	1	0	0.01	1
GO:0006107	oxaloacetate metabolic process	1	0	0.01	1
GO:0006109	regulation of carbohydrate metabolic pro...	12	0	0.14	1
GO:0006110	regulation of glycolytic process	7	0	0.08	1
GO:0006111	regulation of gluconeogenesis	2	0	0.02	1
GO:0006112	energy reserve metabolic process	7	0	0.08	1
GO:0006116	NADH oxidation	1	0	0.01	1
GO:0006119	oxidative phosphorylation	13	0	0.15	1
GO:0006120	mitochondrial electron transport, NADH t...	2	0	0.02	1
GO:0006121	mitochondrial electron transport, succin...	1	0	0.01	1
GO:0006122	mitochondrial electron transport, ubiqui...	2	0	0.02	1
GO:0006123	mitochondrial electron transport, cytoch...	1	0	0.01	1
GO:0006140	regulation of nucleotide metabolic proce...	8	0	0.09	1
GO:0006144	purine nucleobase metabolic process	3	0	0.03	1
GO:0006152	purine nucleoside catabolic process	1	0	0.01	1
GO:0006154	adenosine catabolic process	1	0	0.01	1
GO:0006163	purine nucleotide metabolic process	50	0	0.58	1
GO:0006164	purine nucleotide biosynthetic process	21	0	0.24	1
GO:0006165	nucleoside diphosphate phosphorylation	14	0	0.16	1
GO:0006167	AMP biosynthetic process	1	0	0.01	1
GO:0006171	cAMP biosynthetic process	4	0	0.05	1
GO:0006172	ADP biosynthetic process	1	0	0.01	1
GO:0006177	GMP biosynthetic process	1	0	0.01	1
GO:0006182	cGMP biosynthetic process	7	0	0.08	1
GO:0006183	GTP biosynthetic process	1	0	0.01	1
GO:0006195	purine nucleotide catabolic process	2	0	0.02	1
GO:0006206	pyrimidine nucleobase metabolic process	2	0	0.02	1
GO:0006207	de novo' pyrimidine nucleobase biosynth...	1	0	0.01	1
GO:0006213	pyrimidine nucleoside metabolic process	2	0	0.02	1
GO:0006220	pyrimidine nucleotide metabolic process	8	0	0.09	1
GO:0006221	pyrimidine nucleotide biosynthetic proce...	7	0	0.08	1
GO:0006222	UMP biosynthetic process	3	0	0.03	1
GO:0006226	dUMP biosynthetic process	2	0	0.02	1
GO:0006228	UTP biosynthetic process	1	0	0.01	1
GO:0006231	dTMP biosynthetic process	1	0	0.01	1
GO:0006235	dTTP biosynthetic process	1	0	0.01	1
GO:0006241	CTP biosynthetic process	3	0	0.03	1
GO:0006244	pyrimidine nucleotide catabolic process	2	0	0.02	1
GO:0006260	DNA replication	26	0	0.3	1
GO:0006261	DNA-templated DNA replication	10	0	0.12	1
GO:0006264	mitochondrial DNA replication	2	0	0.02	1
GO:0006265	DNA topological change	3	0	0.03	1
GO:0006266	DNA ligation	4	0	0.05	1
GO:0006268	DNA unwinding involved in DNA replicatio...	3	0	0.03	1
GO:0006270	DNA replication initiation	1	0	0.01	1
GO:0006271	DNA strand elongation involved in DNA re...	1	0	0.01	1
GO:0006272	leading strand elongation	1	0	0.01	1
GO:0006275	regulation of DNA replication	6	0	0.07	1
GO:0006277	DNA amplification	1	0	0.01	1
GO:0006278	RNA-templated DNA biosynthetic process	10	0	0.12	1
GO:0006281	DNA repair	48	0	0.55	1
GO:0006282	regulation of DNA repair	15	0	0.17	1
GO:0006283	transcription-coupled nucleotide-excisio...	2	0	0.02	1
GO:0006284	base-excision repair	5	0	0.06	1
GO:0006285	base-excision repair, AP site formation	1	0	0.01	1
GO:0006287	base-excision repair, gap-filling	2	0	0.02	1
GO:0006289	nucleotide-excision repair	10	0	0.12	1
GO:0006290	pyrimidine dimer repair	1	0	0.01	1
GO:0006293	nucleotide-excision repair, preincision ...	1	0	0.01	1
GO:0006294	nucleotide-excision repair, preincision ...	1	0	0.01	1
GO:0006295	nucleotide-excision repair, DNA incision...	1	0	0.01	1
GO:0006296	nucleotide-excision repair, DNA incision...	1	0	0.01	1
GO:0006298	mismatch repair	4	0	0.05	1
GO:0006301	postreplication repair	3	0	0.03	1
GO:0006302	double-strand break repair	25	0	0.29	1
GO:0006303	double-strand break repair via nonhomolo...	5	0	0.06	1
GO:0006304	DNA modification	10	0	0.12	1
GO:0006305	DNA alkylation	5	0	0.06	1
GO:0006306	DNA methylation	5	0	0.06	1
GO:0006307	DNA dealkylation involved in DNA repair	1	0	0.01	1
GO:0006308	DNA catabolic process	1	0	0.01	1
GO:0006309	apoptotic DNA fragmentation	1	0	0.01	1
GO:0006312	mitotic recombination	3	0	0.03	1
GO:0006313	transposition, DNA-mediated	35	0	0.4	1
GO:0006334	nucleosome assembly	3	0	0.03	1
GO:0006354	DNA-templated transcription, elongation	12	0	0.14	1
GO:0006355	regulation of transcription, DNA-templat...	522	0	6.03	1
GO:0006356	regulation of transcription by RNA polym...	3	0	0.03	1
GO:0006357	regulation of transcription by RNA polym...	458	0	5.29	1
GO:0006359	regulation of transcription by RNA polym...	1	0	0.01	1
GO:0006364	rRNA processing	22	0	0.25	1
GO:0006366	transcription by RNA polymerase II	469	0	5.42	1
GO:0006367	transcription initiation from RNA polyme...	12	0	0.14	1
GO:0006368	transcription elongation from RNA polyme...	10	0	0.12	1
GO:0006369	termination of RNA polymerase II transcr...	1	0	0.01	1
GO:0006370	7-methylguanosine mRNA capping	1	0	0.01	1
GO:0006378	mRNA polyadenylation	3	0	0.03	1
GO:0006379	mRNA cleavage	2	0	0.02	1
GO:0006382	adenosine to inosine editing	1	0	0.01	1
GO:0006383	transcription by RNA polymerase III	2	0	0.02	1
GO:0006388	tRNA splicing, via endonucleolytic cleav...	1	0	0.01	1
GO:0006390	mitochondrial transcription	3	0	0.03	1
GO:0006391	transcription initiation from mitochondr...	1	0	0.01	1
GO:0006397	mRNA processing	44	0	0.51	1
GO:0006399	tRNA metabolic process	28	0	0.32	1
GO:0006400	tRNA modification	14	0	0.16	1
GO:0006401	RNA catabolic process	23	0	0.27	1
GO:0006402	mRNA catabolic process	20	0	0.23	1
GO:0006405	RNA export from nucleus	11	0	0.13	1
GO:0006406	mRNA export from nucleus	9	0	0.1	1
GO:0006409	tRNA export from nucleus	2	0	0.02	1
GO:0006413	translational initiation	9	0	0.1	1
GO:0006414	translational elongation	5	0	0.06	1
GO:0006415	translational termination	2	0	0.02	1
GO:0006418	tRNA aminoacylation for protein translat...	5	0	0.06	1
GO:0006419	alanyl-tRNA aminoacylation	1	0	0.01	1
GO:0006420	arginyl-tRNA aminoacylation	1	0	0.01	1
GO:0006424	glutamyl-tRNA aminoacylation	1	0	0.01	1
GO:0006432	phenylalanyl-tRNA aminoacylation	1	0	0.01	1
GO:0006437	tyrosyl-tRNA aminoacylation	1	0	0.01	1
GO:0006446	regulation of translational initiation	5	0	0.06	1
GO:0006448	regulation of translational elongation	2	0	0.02	1
GO:0006449	regulation of translational termination	2	0	0.02	1
GO:0006450	regulation of translational fidelity	2	0	0.02	1
GO:0006452	translational frameshifting	1	0	0.01	1
GO:0006457	protein folding	20	0	0.23	1
GO:0006458	de novo' protein folding	3	0	0.03	1
GO:0006469	negative regulation of protein kinase ac...	9	0	0.1	1
GO:0006470	protein dephosphorylation	29	0	0.33	1
GO:0006471	protein ADP-ribosylation	6	0	0.07	1
GO:0006473	protein acetylation	21	0	0.24	1
GO:0006474	N-terminal protein amino acid acetylatio...	1	0	0.01	1
GO:0006475	internal protein amino acid acetylation	20	0	0.23	1
GO:0006476	protein deacetylation	10	0	0.12	1
GO:0006477	protein sulfation	2	0	0.02	1
GO:0006478	peptidyl-tyrosine sulfation	1	0	0.01	1
GO:0006479	protein methylation	12	0	0.14	1
GO:0006482	protein demethylation	3	0	0.03	1
GO:0006487	protein N-linked glycosylation	10	0	0.12	1
GO:0006488	dolichol-linked oligosaccharide biosynth...	3	0	0.03	1
GO:0006490	oligosaccharide-lipid intermediate biosy...	3	0	0.03	1
GO:0006491	N-glycan processing	3	0	0.03	1
GO:0006497	protein lipidation	6	0	0.07	1
GO:0006501	C-terminal protein lipidation	1	0	0.01	1
GO:0006505	GPI anchor metabolic process	3	0	0.03	1
GO:0006506	GPI anchor biosynthetic process	3	0	0.03	1
GO:0006509	membrane protein ectodomain proteolysis	2	0	0.02	1
GO:0006513	protein monoubiquitination	9	0	0.1	1
GO:0006515	protein quality control for misfolded or...	4	0	0.05	1
GO:0006516	glycoprotein catabolic process	1	0	0.01	1
GO:0006517	protein deglycosylation	2	0	0.02	1
GO:0006521	regulation of cellular amino acid metabo...	1	0	0.01	1
GO:0006522	alanine metabolic process	1	0	0.01	1
GO:0006524	alanine catabolic process	1	0	0.01	1
GO:0006525	arginine metabolic process	1	0	0.01	1
GO:0006528	asparagine metabolic process	1	0	0.01	1
GO:0006531	aspartate metabolic process	1	0	0.01	1
GO:0006533	aspartate catabolic process	1	0	0.01	1
GO:0006535	cysteine biosynthetic process from serin...	2	0	0.02	1
GO:0006541	glutamine metabolic process	3	0	0.03	1
GO:0006542	glutamine biosynthetic process	2	0	0.02	1
GO:0006544	glycine metabolic process	2	0	0.02	1
GO:0006545	glycine biosynthetic process	1	0	0.01	1
GO:0006549	isoleucine metabolic process	1	0	0.01	1
GO:0006551	leucine metabolic process	1	0	0.01	1
GO:0006552	leucine catabolic process	1	0	0.01	1
GO:0006553	lysine metabolic process	2	0	0.02	1
GO:0006554	lysine catabolic process	1	0	0.01	1
GO:0006555	methionine metabolic process	3	0	0.03	1
GO:0006556	S-adenosylmethionine biosynthetic proces...	2	0	0.02	1
GO:0006558	L-phenylalanine metabolic process	1	0	0.01	1
GO:0006559	L-phenylalanine catabolic process	1	0	0.01	1
GO:0006561	proline biosynthetic process	1	0	0.01	1
GO:0006563	L-serine metabolic process	3	0	0.03	1
GO:0006565	L-serine catabolic process	1	0	0.01	1
GO:0006566	threonine metabolic process	2	0	0.02	1
GO:0006567	threonine catabolic process	2	0	0.02	1
GO:0006568	tryptophan metabolic process	2	0	0.02	1
GO:0006569	tryptophan catabolic process	2	0	0.02	1
GO:0006570	tyrosine metabolic process	2	0	0.02	1
GO:0006572	tyrosine catabolic process	1	0	0.01	1
GO:0006575	cellular modified amino acid metabolic p...	24	0	0.28	1
GO:0006576	cellular biogenic amine metabolic proces...	15	0	0.17	1
GO:0006577	amino-acid betaine metabolic process	5	0	0.06	1
GO:0006578	amino-acid betaine biosynthetic process	3	0	0.03	1
GO:0006579	amino-acid betaine catabolic process	1	0	0.01	1
GO:0006581	acetylcholine catabolic process	2	0	0.02	1
GO:0006582	melanin metabolic process	1	0	0.01	1
GO:0006584	catecholamine metabolic process	10	0	0.12	1
GO:0006586	indolalkylamine metabolic process	2	0	0.02	1
GO:0006589	octopamine biosynthetic process	1	0	0.01	1
GO:0006590	thyroid hormone generation	2	0	0.02	1
GO:0006591	ornithine metabolic process	1	0	0.01	1
GO:0006595	polyamine metabolic process	3	0	0.03	1
GO:0006596	polyamine biosynthetic process	2	0	0.02	1
GO:0006598	polyamine catabolic process	1	0	0.01	1
GO:0006599	phosphagen metabolic process	1	0	0.01	1
GO:0006603	phosphocreatine metabolic process	1	0	0.01	1
GO:0006605	protein targeting	37	0	0.43	1
GO:0006606	protein import into nucleus	16	0	0.18	1
GO:0006612	protein targeting to membrane	14	0	0.16	1
GO:0006622	protein targeting to lysosome	3	0	0.03	1
GO:0006623	protein targeting to vacuole	8	0	0.09	1
GO:0006624	vacuolar protein processing	1	0	0.01	1
GO:0006625	protein targeting to peroxisome	2	0	0.02	1
GO:0006626	protein targeting to mitochondrion	12	0	0.14	1
GO:0006627	protein processing involved in protein t...	1	0	0.01	1
GO:0006635	fatty acid beta-oxidation	10	0	0.12	1
GO:0006637	acyl-CoA metabolic process	8	0	0.09	1
GO:0006640	monoacylglycerol biosynthetic process	1	0	0.01	1
GO:0006643	membrane lipid metabolic process	22	0	0.25	1
GO:0006644	phospholipid metabolic process	30	0	0.35	1
GO:0006646	phosphatidylethanolamine biosynthetic pr...	1	0	0.01	1
GO:0006650	glycerophospholipid metabolic process	23	0	0.27	1
GO:0006654	phosphatidic acid biosynthetic process	1	0	0.01	1
GO:0006658	phosphatidylserine metabolic process	2	0	0.02	1
GO:0006660	phosphatidylserine catabolic process	2	0	0.02	1
GO:0006661	phosphatidylinositol biosynthetic proces...	10	0	0.12	1
GO:0006664	glycolipid metabolic process	11	0	0.13	1
GO:0006665	sphingolipid metabolic process	17	0	0.2	1
GO:0006668	sphinganine-1-phosphate metabolic proces...	1	0	0.01	1
GO:0006670	sphingosine metabolic process	3	0	0.03	1
GO:0006672	ceramide metabolic process	11	0	0.13	1
GO:0006677	glycosylceramide metabolic process	1	0	0.01	1
GO:0006681	galactosylceramide metabolic process	1	0	0.01	1
GO:0006682	galactosylceramide biosynthetic process	1	0	0.01	1
GO:0006684	sphingomyelin metabolic process	3	0	0.03	1
GO:0006685	sphingomyelin catabolic process	1	0	0.01	1
GO:0006687	glycosphingolipid metabolic process	7	0	0.08	1
GO:0006688	glycosphingolipid biosynthetic process	2	0	0.02	1
GO:0006689	ganglioside catabolic process	1	0	0.01	1
GO:0006690	icosanoid metabolic process	10	0	0.12	1
GO:0006691	leukotriene metabolic process	3	0	0.03	1
GO:0006692	prostanoid metabolic process	5	0	0.06	1
GO:0006693	prostaglandin metabolic process	5	0	0.06	1
GO:0006702	androgen biosynthetic process	1	0	0.01	1
GO:0006703	estrogen biosynthetic process	3	0	0.03	1
GO:0006706	steroid catabolic process	7	0	0.08	1
GO:0006707	cholesterol catabolic process	1	0	0.01	1
GO:0006711	estrogen catabolic process	2	0	0.02	1
GO:0006720	isoprenoid metabolic process	17	0	0.2	1
GO:0006721	terpenoid metabolic process	15	0	0.17	1
GO:0006722	triterpenoid metabolic process	1	0	0.01	1
GO:0006726	eye pigment biosynthetic process	1	0	0.01	1
GO:0006727	ommochrome biosynthetic process	1	0	0.01	1
GO:0006729	tetrahydrobiopterin biosynthetic process	1	0	0.01	1
GO:0006730	one-carbon metabolic process	3	0	0.03	1
GO:0006734	NADH metabolic process	1	0	0.01	1
GO:0006739	NADP metabolic process	7	0	0.08	1
GO:0006740	NADPH regeneration	3	0	0.03	1
GO:0006741	NADP biosynthetic process	2	0	0.02	1
GO:0006743	ubiquinone metabolic process	3	0	0.03	1
GO:0006744	ubiquinone biosynthetic process	3	0	0.03	1
GO:0006749	glutathione metabolic process	9	0	0.1	1
GO:0006750	glutathione biosynthetic process	1	0	0.01	1
GO:0006751	glutathione catabolic process	2	0	0.02	1
GO:0006753	nucleoside phosphate metabolic process	71	0	0.82	1
GO:0006754	ATP biosynthetic process	2	0	0.02	1
GO:0006757	ATP generation from ADP	12	0	0.14	1
GO:0006760	folic acid-containing compound metabolic...	2	0	0.02	1
GO:0006766	vitamin metabolic process	13	0	0.15	1
GO:0006767	water-soluble vitamin metabolic process	8	0	0.09	1
GO:0006768	biotin metabolic process	2	0	0.02	1
GO:0006775	fat-soluble vitamin metabolic process	3	0	0.03	1
GO:0006778	porphyrin-containing compound metabolic ...	8	0	0.09	1
GO:0006779	porphyrin-containing compound biosynthet...	5	0	0.06	1
GO:0006782	protoporphyrinogen IX biosynthetic proce...	1	0	0.01	1
GO:0006783	heme biosynthetic process	4	0	0.05	1
GO:0006784	heme A biosynthetic process	1	0	0.01	1
GO:0006787	porphyrin-containing compound catabolic ...	1	0	0.01	1
GO:0006789	bilirubin conjugation	1	0	0.01	1
GO:0006801	superoxide metabolic process	4	0	0.05	1
GO:0006805	xenobiotic metabolic process	9	0	0.1	1
GO:0006809	nitric oxide biosynthetic process	9	0	0.1	1
GO:0006811	ion transport	156	0	1.8	1
GO:0006812	cation transport	109	0	1.26	1
GO:0006813	potassium ion transport	31	0	0.36	1
GO:0006814	sodium ion transport	36	0	0.42	1
GO:0006816	calcium ion transport	27	0	0.31	1
GO:0006820	anion transport	54	0	0.62	1
GO:0006821	chloride transport	11	0	0.13	1
GO:0006825	copper ion transport	1	0	0.01	1
GO:0006826	iron ion transport	6	0	0.07	1
GO:0006828	manganese ion transport	2	0	0.02	1
GO:0006829	zinc ion transport	7	0	0.08	1
GO:0006833	water transport	1	0	0.01	1
GO:0006835	dicarboxylic acid transport	14	0	0.16	1
GO:0006836	neurotransmitter transport	23	0	0.27	1
GO:0006839	mitochondrial transport	14	0	0.16	1
GO:0006842	tricarboxylic acid transport	1	0	0.01	1
GO:0006843	mitochondrial citrate transmembrane tran...	1	0	0.01	1
GO:0006851	mitochondrial calcium ion transmembrane ...	4	0	0.05	1
GO:0006855	xenobiotic transmembrane transport	2	0	0.02	1
GO:0006857	oligopeptide transport	3	0	0.03	1
GO:0006858	extracellular transport	1	0	0.01	1
GO:0006862	nucleotide transport	6	0	0.07	1
GO:0006864	pyrimidine nucleotide transport	1	0	0.01	1
GO:0006873	cellular ion homeostasis	48	0	0.55	1
GO:0006874	cellular calcium ion homeostasis	30	0	0.35	1
GO:0006875	cellular metal ion homeostasis	41	0	0.47	1
GO:0006878	cellular copper ion homeostasis	2	0	0.02	1
GO:0006879	cellular iron ion homeostasis	4	0	0.05	1
GO:0006882	cellular zinc ion homeostasis	4	0	0.05	1
GO:0006883	cellular sodium ion homeostasis	2	0	0.02	1
GO:0006885	regulation of pH	9	0	0.1	1
GO:0006886	intracellular protein transport	83	0	0.96	1
GO:0006887	exocytosis	35	0	0.4	1
GO:0006888	endoplasmic reticulum to Golgi vesicle-m...	28	0	0.32	1
GO:0006890	retrograde vesicle-mediated transport, G...	10	0	0.12	1
GO:0006891	intra-Golgi vesicle-mediated transport	4	0	0.05	1
GO:0006892	post-Golgi vesicle-mediated transport	23	0	0.27	1
GO:0006893	Golgi to plasma membrane transport	11	0	0.13	1
GO:0006895	Golgi to endosome transport	5	0	0.06	1
GO:0006896	Golgi to vacuole transport	5	0	0.06	1
GO:0006900	vesicle budding from membrane	5	0	0.06	1
GO:0006901	vesicle coating	2	0	0.02	1
GO:0006903	vesicle targeting	4	0	0.05	1
GO:0006904	vesicle docking involved in exocytosis	3	0	0.03	1
GO:0006906	vesicle fusion	9	0	0.1	1
GO:0006907	pinocytosis	2	0	0.02	1
GO:0006909	phagocytosis	20	0	0.23	1
GO:0006910	phagocytosis, recognition	9	0	0.1	1
GO:0006911	phagocytosis, engulfment	5	0	0.06	1
GO:0006914	autophagy	26	0	0.3	1
GO:0006919	activation of cysteine-type endopeptidas...	3	0	0.03	1
GO:0006921	cellular component disassembly involved ...	2	0	0.02	1
GO:0006925	inflammatory cell apoptotic process	1	0	0.01	1
GO:0006929	substrate-dependent cell migration	2	0	0.02	1
GO:0006931	substrate-dependent cell migration, cell...	1	0	0.01	1
GO:0006935	chemotaxis	55	0	0.64	1
GO:0006936	muscle contraction	30	0	0.35	1
GO:0006937	regulation of muscle contraction	15	0	0.17	1
GO:0006939	smooth muscle contraction	4	0	0.05	1
GO:0006940	regulation of smooth muscle contraction	3	0	0.03	1
GO:0006941	striated muscle contraction	22	0	0.25	1
GO:0006942	regulation of striated muscle contractio...	12	0	0.14	1
GO:0006949	syncytium formation	4	0	0.05	1
GO:0006953	acute-phase response	1	0	0.01	1
GO:0006956	complement activation	17	0	0.2	1
GO:0006959	humoral immune response	27	0	0.31	1
GO:0006968	cellular defense response	1	0	0.01	1
GO:0006970	response to osmotic stress	5	0	0.06	1
GO:0006972	hyperosmotic response	1	0	0.01	1
GO:0006974	cellular response to DNA damage stimulus	61	0	0.7	1
GO:0006977	DNA damage response, signal transduction...	1	0	0.01	1
GO:0006979	response to oxidative stress	29	0	0.33	1
GO:0006983	ER overload response	1	0	0.01	1
GO:0006986	response to unfolded protein	10	0	0.12	1
GO:0006995	cellular response to nitrogen starvation	2	0	0.02	1
GO:0006998	nuclear envelope organization	1	0	0.01	1
GO:0007000	nucleolus organization	3	0	0.03	1
GO:0007004	telomere maintenance via telomerase	8	0	0.09	1
GO:0007005	mitochondrion organization	39	0	0.45	1
GO:0007006	mitochondrial membrane organization	6	0	0.07	1
GO:0007007	inner mitochondrial membrane organizatio...	4	0	0.05	1
GO:0007009	plasma membrane organization	20	0	0.23	1
GO:0007015	actin filament organization	35	0	0.4	1
GO:0007018	microtubule-based movement	49	0	0.57	1
GO:0007019	microtubule depolymerization	5	0	0.06	1
GO:0007020	microtubule nucleation	1	0	0.01	1
GO:0007026	negative regulation of microtubule depol...	4	0	0.05	1
GO:0007029	endoplasmic reticulum organization	8	0	0.09	1
GO:0007030	Golgi organization	17	0	0.2	1
GO:0007031	peroxisome organization	3	0	0.03	1
GO:0007032	endosome organization	5	0	0.06	1
GO:0007033	vacuole organization	14	0	0.16	1
GO:0007034	vacuolar transport	17	0	0.2	1
GO:0007035	vacuolar acidification	1	0	0.01	1
GO:0007039	protein catabolic process in the vacuole	3	0	0.03	1
GO:0007040	lysosome organization	6	0	0.07	1
GO:0007041	lysosomal transport	11	0	0.13	1
GO:0007042	lysosomal lumen acidification	1	0	0.01	1
GO:0007043	cell-cell junction assembly	9	0	0.1	1
GO:0007044	cell-substrate junction assembly	3	0	0.03	1
GO:0007051	spindle organization	24	0	0.28	1
GO:0007052	mitotic spindle organization	19	0	0.22	1
GO:0007056	spindle assembly involved in female meio...	1	0	0.01	1
GO:0007057	spindle assembly involved in female meio...	1	0	0.01	1
GO:0007059	chromosome segregation	37	0	0.43	1
GO:0007062	sister chromatid cohesion	9	0	0.1	1
GO:0007063	regulation of sister chromatid cohesion	4	0	0.05	1
GO:0007064	mitotic sister chromatid cohesion	4	0	0.05	1
GO:0007076	mitotic chromosome condensation	4	0	0.05	1
GO:0007079	mitotic chromosome movement towards spin...	1	0	0.01	1
GO:0007080	mitotic metaphase plate congression	7	0	0.08	1
GO:0007088	regulation of mitotic nuclear division	14	0	0.16	1
GO:0007091	metaphase/anaphase transition of mitotic...	6	0	0.07	1
GO:0007093	mitotic cell cycle checkpoint signaling	10	0	0.12	1
GO:0007094	mitotic spindle assembly checkpoint sign...	4	0	0.05	1
GO:0007095	mitotic G2 DNA damage checkpoint signali...	3	0	0.03	1
GO:0007096	regulation of exit from mitosis	5	0	0.06	1
GO:0007097	nuclear migration	6	0	0.07	1
GO:0007098	centrosome cycle	13	0	0.15	1
GO:0007099	centriole replication	4	0	0.05	1
GO:0007100	mitotic centrosome separation	3	0	0.03	1
GO:0007111	meiosis II cytokinesis	2	0	0.02	1
GO:0007113	endomitotic cell cycle	1	0	0.01	1
GO:0007127	meiosis I	13	0	0.15	1
GO:0007129	homologous chromosome pairing at meiosis	5	0	0.06	1
GO:0007130	synaptonemal complex assembly	2	0	0.02	1
GO:0007131	reciprocal meiotic recombination	7	0	0.08	1
GO:0007135	meiosis II	1	0	0.01	1
GO:0007140	male meiotic nuclear division	5	0	0.06	1
GO:0007141	male meiosis I	3	0	0.03	1
GO:0007143	female meiotic nuclear division	3	0	0.03	1
GO:0007144	female meiosis I	2	0	0.02	1
GO:0007158	neuron cell-cell adhesion	2	0	0.02	1
GO:0007159	leukocyte cell-cell adhesion	53	0	0.61	1
GO:0007160	cell-matrix adhesion	9	0	0.1	1
GO:0007162	negative regulation of cell adhesion	49	0	0.57	1
GO:0007164	establishment of tissue polarity	4	0	0.05	1
GO:0007168	receptor guanylyl cyclase signaling path...	7	0	0.08	1
GO:0007171	activation of transmembrane receptor pro...	3	0	0.03	1
GO:0007173	epidermal growth factor receptor signali...	9	0	0.1	1
GO:0007178	transmembrane receptor protein serine/th...	25	0	0.29	1
GO:0007179	transforming growth factor beta receptor...	11	0	0.13	1
GO:0007182	common-partner SMAD protein phosphorylat...	1	0	0.01	1
GO:0007183	SMAD protein complex assembly	2	0	0.02	1
GO:0007185	transmembrane receptor protein tyrosine ...	1	0	0.01	1
GO:0007186	G protein-coupled receptor signaling pat...	49	0	0.57	1
GO:0007187	G protein-coupled receptor signaling pat...	4	0	0.05	1
GO:0007188	adenylate cyclase-modulating G protein-c...	10	0	0.12	1
GO:0007189	adenylate cyclase-activating G protein-c...	6	0	0.07	1
GO:0007190	activation of adenylate cyclase activity	2	0	0.02	1
GO:0007191	adenylate cyclase-activating dopamine re...	1	0	0.01	1
GO:0007193	adenylate cyclase-inhibiting G protein-c...	5	0	0.06	1
GO:0007194	negative regulation of adenylate cyclase...	2	0	0.02	1
GO:0007195	adenylate cyclase-inhibiting dopamine re...	1	0	0.01	1
GO:0007198	adenylate cyclase-inhibiting serotonin r...	1	0	0.01	1
GO:0007200	phospholipase C-activating G protein-cou...	3	0	0.03	1
GO:0007202	activation of phospholipase C activity	2	0	0.02	1
GO:0007204	positive regulation of cytosolic calcium...	17	0	0.2	1
GO:0007210	serotonin receptor signaling pathway	1	0	0.01	1
GO:0007212	dopamine receptor signaling pathway	2	0	0.02	1
GO:0007213	G protein-coupled acetylcholine receptor...	3	0	0.03	1
GO:0007214	gamma-aminobutyric acid signaling pathwa...	2	0	0.02	1
GO:0007215	glutamate receptor signaling pathway	2	0	0.02	1
GO:0007218	neuropeptide signaling pathway	9	0	0.1	1
GO:0007219	Notch signaling pathway	35	0	0.4	1
GO:0007220	Notch receptor processing	3	0	0.03	1
GO:0007221	positive regulation of transcription of ...	1	0	0.01	1
GO:0007223	Wnt signaling pathway, calcium modulatin...	1	0	0.01	1
GO:0007229	integrin-mediated signaling pathway	2	0	0.02	1
GO:0007249	I-kappaB kinase/NF-kappaB signaling	8	0	0.09	1
GO:0007250	activation of NF-kappaB-inducing kinase ...	1	0	0.01	1
GO:0007252	I-kappaB phosphorylation	1	0	0.01	1
GO:0007253	cytoplasmic sequestering of NF-kappaB	1	0	0.01	1
GO:0007254	JNK cascade	16	0	0.18	1
GO:0007259	receptor signaling pathway via JAK-STAT	10	0	0.12	1
GO:0007260	tyrosine phosphorylation of STAT protein	3	0	0.03	1
GO:0007263	nitric oxide mediated signal transductio...	1	0	0.01	1
GO:0007264	small GTPase mediated signal transductio...	35	0	0.4	1
GO:0007265	Ras protein signal transduction	29	0	0.33	1
GO:0007266	Rho protein signal transduction	4	0	0.05	1
GO:0007269	neurotransmitter secretion	14	0	0.16	1
GO:0007271	synaptic transmission, cholinergic	10	0	0.12	1
GO:0007272	ensheathment of neurons	11	0	0.13	1
GO:0007274	neuromuscular synaptic transmission	13	0	0.15	1
GO:0007288	sperm axoneme assembly	2	0	0.02	1
GO:0007293	germarium-derived egg chamber formation	5	0	0.06	1
GO:0007294	germarium-derived oocyte fate determinat...	1	0	0.01	1
GO:0007297	ovarian follicle cell migration	4	0	0.05	1
GO:0007298	border follicle cell migration	4	0	0.05	1
GO:0007300	ovarian nurse cell to oocyte transport	3	0	0.03	1
GO:0007301	female germline ring canal formation	3	0	0.03	1
GO:0007303	cytoplasmic transport, nurse cell to ooc...	2	0	0.02	1
GO:0007304	chorion-containing eggshell formation	4	0	0.05	1
GO:0007306	eggshell chorion assembly	3	0	0.03	1
GO:0007307	eggshell chorion gene amplification	1	0	0.01	1
GO:0007338	single fertilization	7	0	0.08	1
GO:0007339	binding of sperm to zona pellucida	2	0	0.02	1
GO:0007340	acrosome reaction	1	0	0.01	1
GO:0007341	penetration of zona pellucida	1	0	0.01	1
GO:0007343	egg activation	2	0	0.02	1
GO:0007346	regulation of mitotic cell cycle	46	0	0.53	1
GO:0007349	cellularization	3	0	0.03	1
GO:0007354	zygotic determination of anterior/poster...	1	0	0.01	1
GO:0007368	determination of left/right symmetry	20	0	0.23	1
GO:0007386	compartment pattern specification	5	0	0.06	1
GO:0007391	dorsal closure	2	0	0.02	1
GO:0007400	neuroblast fate determination	1	0	0.01	1
GO:0007403	glial cell fate determination	1	0	0.01	1
GO:0007405	neuroblast proliferation	8	0	0.09	1
GO:0007409	axonogenesis	51	0	0.59	1
GO:0007411	axon guidance	29	0	0.33	1
GO:0007413	axonal fasciculation	2	0	0.02	1
GO:0007414	axonal defasciculation	1	0	0.01	1
GO:0007415	defasciculation of motor neuron axon	1	0	0.01	1
GO:0007416	synapse assembly	23	0	0.27	1
GO:0007418	ventral midline development	1	0	0.01	1
GO:0007419	ventral cord development	2	0	0.02	1
GO:0007420	brain development	79	0	0.91	1
GO:0007422	peripheral nervous system development	8	0	0.09	1
GO:0007426	tracheal outgrowth, open tracheal system	1	0	0.01	1
GO:0007431	salivary gland development	5	0	0.06	1
GO:0007432	salivary gland boundary specification	1	0	0.01	1
GO:0007435	salivary gland morphogenesis	4	0	0.05	1
GO:0007440	foregut morphogenesis	3	0	0.03	1
GO:0007442	hindgut morphogenesis	4	0	0.05	1
GO:0007443	Malpighian tubule morphogenesis	4	0	0.05	1
GO:0007450	dorsal/ventral pattern formation, imagin...	2	0	0.02	1
GO:0007455	eye-antennal disc morphogenesis	1	0	0.01	1
GO:0007460	R8 cell fate commitment	1	0	0.01	1
GO:0007469	antennal development	3	0	0.03	1
GO:0007474	imaginal disc-derived wing vein specific...	1	0	0.01	1
GO:0007478	leg disc morphogenesis	3	0	0.03	1
GO:0007480	imaginal disc-derived leg morphogenesis	3	0	0.03	1
GO:0007483	genital disc morphogenesis	1	0	0.01	1
GO:0007484	imaginal disc-derived genitalia developm...	2	0	0.02	1
GO:0007485	imaginal disc-derived male genitalia dev...	2	0	0.02	1
GO:0007488	histoblast morphogenesis	2	0	0.02	1
GO:0007492	endoderm development	13	0	0.15	1
GO:0007500	mesodermal cell fate determination	1	0	0.01	1
GO:0007501	mesodermal cell fate specification	1	0	0.01	1
GO:0007503	fat body development	1	0	0.01	1
GO:0007505	adult fat body development	1	0	0.01	1
GO:0007507	heart development	71	0	0.82	1
GO:0007512	adult heart development	5	0	0.06	1
GO:0007517	muscle organ development	31	0	0.36	1
GO:0007519	skeletal muscle tissue development	9	0	0.1	1
GO:0007520	myoblast fusion	4	0	0.05	1
GO:0007521	muscle cell fate determination	1	0	0.01	1
GO:0007522	visceral muscle development	2	0	0.02	1
GO:0007525	somatic muscle development	3	0	0.03	1
GO:0007527	adult somatic muscle development	1	0	0.01	1
GO:0007528	neuromuscular junction development	18	0	0.21	1
GO:0007530	sex determination	1	0	0.01	1
GO:0007548	sex differentiation	27	0	0.31	1
GO:0007561	imaginal disc eversion	1	0	0.01	1
GO:0007565	female pregnancy	8	0	0.09	1
GO:0007567	parturition	1	0	0.01	1
GO:0007568	aging	8	0	0.09	1
GO:0007585	respiratory gaseous exchange by respirat...	2	0	0.02	1
GO:0007588	excretion	6	0	0.07	1
GO:0007589	body fluid secretion	5	0	0.06	1
GO:0007591	molting cycle, chitin-based cuticle	2	0	0.02	1
GO:0007595	lactation	3	0	0.03	1
GO:0007596	blood coagulation	18	0	0.21	1
GO:0007597	blood coagulation, intrinsic pathway	1	0	0.01	1
GO:0007599	hemostasis	18	0	0.21	1
GO:0007602	phototransduction	3	0	0.03	1
GO:0007605	sensory perception of sound	19	0	0.22	1
GO:0007606	sensory perception of chemical stimulus	4	0	0.05	1
GO:0007608	sensory perception of smell	3	0	0.03	1
GO:0007614	short-term memory	3	0	0.03	1
GO:0007616	long-term memory	6	0	0.07	1
GO:0007617	mating behavior	5	0	0.06	1
GO:0007619	courtship behavior	3	0	0.03	1
GO:0007626	locomotory behavior	24	0	0.28	1
GO:0007628	adult walking behavior	3	0	0.03	1
GO:0007629	flight behavior	1	0	0.01	1
GO:0007631	feeding behavior	8	0	0.09	1
GO:0007632	visual behavior	3	0	0.03	1
GO:0007634	optokinetic behavior	1	0	0.01	1
GO:0007637	proboscis extension reflex	1	0	0.01	1
GO:0007638	mechanosensory behavior	4	0	0.05	1
GO:0008015	blood circulation	42	0	0.48	1
GO:0008016	regulation of heart contraction	17	0	0.2	1
GO:0008033	tRNA processing	20	0	0.23	1
GO:0008038	neuron recognition	8	0	0.09	1
GO:0008039	synaptic target recognition	1	0	0.01	1
GO:0008045	motor neuron axon guidance	6	0	0.07	1
GO:0008052	sensory organ boundary specification	1	0	0.01	1
GO:0008053	mitochondrial fusion	2	0	0.02	1
GO:0008055	ocellus pigment biosynthetic process	1	0	0.01	1
GO:0008057	eye pigment granule organization	1	0	0.01	1
GO:0008063	Toll signaling pathway	2	0	0.02	1
GO:0008064	regulation of actin polymerization or de...	9	0	0.1	1
GO:0008088	axo-dendritic transport	8	0	0.09	1
GO:0008089	anterograde axonal transport	3	0	0.03	1
GO:0008090	retrograde axonal transport	3	0	0.03	1
GO:0008154	actin polymerization or depolymerization	14	0	0.16	1
GO:0008206	bile acid metabolic process	1	0	0.01	1
GO:0008209	androgen metabolic process	2	0	0.02	1
GO:0008210	estrogen metabolic process	9	0	0.1	1
GO:0008213	protein alkylation	12	0	0.14	1
GO:0008214	protein dealkylation	3	0	0.03	1
GO:0008216	spermidine metabolic process	2	0	0.02	1
GO:0008217	regulation of blood pressure	10	0	0.12	1
GO:0008218	bioluminescence	2	0	0.02	1
GO:0008228	opsonization	1	0	0.01	1
GO:0008258	head involution	1	0	0.01	1
GO:0008272	sulfate transport	1	0	0.01	1
GO:0008277	regulation of G protein-coupled receptor...	4	0	0.05	1
GO:0008283	cell population proliferation	146	0	1.69	1
GO:0008284	positive regulation of cell population p...	65	0	0.75	1
GO:0008285	negative regulation of cell population p...	39	0	0.45	1
GO:0008286	insulin receptor signaling pathway	5	0	0.06	1
GO:0008291	acetylcholine metabolic process	2	0	0.02	1
GO:0008295	spermidine biosynthetic process	1	0	0.01	1
GO:0008299	isoprenoid biosynthetic process	5	0	0.06	1
GO:0008302	female germline ring canal formation, ac...	2	0	0.02	1
GO:0008315	G2/MI transition of meiotic cell cycle	1	0	0.01	1
GO:0008333	endosome to lysosome transport	7	0	0.08	1
GO:0008334	histone mRNA metabolic process	1	0	0.01	1
GO:0008340	determination of adult lifespan	7	0	0.08	1
GO:0008343	adult feeding behavior	1	0	0.01	1
GO:0008344	adult locomotory behavior	9	0	0.1	1
GO:0008345	larval locomotory behavior	5	0	0.06	1
GO:0008347	glial cell migration	5	0	0.06	1
GO:0008348	negative regulation of antimicrobial hum...	2	0	0.02	1
GO:0008354	germ cell migration	1	0	0.01	1
GO:0008356	asymmetric cell division	5	0	0.06	1
GO:0008360	regulation of cell shape	7	0	0.08	1
GO:0008361	regulation of cell size	20	0	0.23	1
[truncated: 6,077 more rows]

## Sheet: Set 8
GO.ID	Term	Annotated	Significant	Expected	weightFisher
GO:0007017	microtubule-based process	118	6	2.07	0.0036
GO:0006289	nucleotide-excision repair	10	2	0.18	0.0124
GO:0015074	DNA integration	150	7	2.63	0.0136
GO:0006260	DNA replication	26	4	0.46	0.0162
GO:0035092	sperm DNA condensation	5	2	0.09	0.0171
GO:1905463	negative regulation of DNA duplex unwind...	1	1	0.02	0.0176
GO:0008295	spermidine biosynthetic process	1	1	0.02	0.0176
GO:1902723	negative regulation of skeletal muscle s...	1	1	0.02	0.0176
GO:1902725	negative regulation of satellite cell di...	1	1	0.02	0.0176
GO:0014839	myoblast migration involved in skeletal ...	1	1	0.02	0.0176
GO:0072702	response to methyl methanesulfonate	1	1	0.02	0.0176
GO:0006123	mitochondrial electron transport, cytoch...	1	1	0.02	0.0176
GO:0033189	response to vitamin A	1	1	0.02	0.0176
GO:0019860	uracil metabolic process	1	1	0.02	0.0176
GO:1900264	positive regulation of DNA-directed DNA ...	1	1	0.02	0.0176
GO:0035999	tetrahydrofolate interconversion	1	1	0.02	0.0176
GO:0007307	eggshell chorion gene amplification	1	1	0.02	0.0176
GO:0051096	positive regulation of helicase activity	1	1	0.02	0.0176
GO:2000818	negative regulation of myoblast prolifer...	1	1	0.02	0.0176
GO:0019391	glucuronoside catabolic process	1	1	0.02	0.0176
GO:1902394	positive regulation of exodeoxyribonucle...	1	1	0.02	0.0176
GO:0030263	apoptotic chromosome condensation	1	1	0.02	0.0176
GO:0006272	leading strand elongation	1	1	0.02	0.0176
GO:0033389	putrescine biosynthetic process from arg...	1	1	0.02	0.0176
GO:2000380	regulation of mesoderm development	1	1	0.02	0.0176
GO:0006231	dTMP biosynthetic process	1	1	0.02	0.0176
GO:0006235	dTTP biosynthetic process	1	1	0.02	0.0176
GO:0035063	nuclear speck organization	1	1	0.02	0.0176
GO:0010759	positive regulation of macrophage chemot...	1	1	0.02	0.0176
GO:0035076	ecdysone receptor-mediated signaling pat...	1	1	0.02	0.0176
GO:0000712	resolution of meiotic recombination inte...	1	1	0.02	0.0176
GO:0035041	sperm DNA decondensation	1	1	0.02	0.0176
GO:0090297	positive regulation of mitochondrial DNA...	1	1	0.02	0.0176
GO:0071340	skeletal muscle acetylcholine-gated chan...	1	1	0.02	0.0176
GO:0060574	intestinal epithelial cell maturation	1	1	0.02	0.0176
GO:0090592	DNA synthesis involved in DNA replicatio...	1	1	0.02	0.0176
GO:0036065	fucosylation	12	2	0.21	0.0177
GO:1904378	maintenance of unfolded protein involved...	2	1	0.04	0.0348
GO:0002098	tRNA wobble uridine modification	2	1	0.04	0.0348
GO:0010592	positive regulation of lamellipodium ass...	2	1	0.04	0.0348
GO:0051593	response to folic acid	2	1	0.04	0.0348
GO:0031119	tRNA pseudouridine synthesis	2	1	0.04	0.0348
GO:0007158	neuron cell-cell adhesion	2	1	0.04	0.0348
GO:1904906	positive regulation of endothelial cell-...	2	1	0.04	0.0348
GO:0017148	negative regulation of translation	18	2	0.32	0.0385
GO:0006275	regulation of DNA replication	6	2	0.11	0.0505
GO:0009263	deoxyribonucleotide biosynthetic process	6	2	0.11	0.0505
GO:0006703	estrogen biosynthetic process	3	1	0.05	0.0518
GO:0070816	phosphorylation of RNA polymerase II C-t...	3	1	0.05	0.0518
GO:0019985	translesion synthesis	3	1	0.05	0.0518
GO:0097421	liver regeneration	3	1	0.05	0.0518
GO:1990481	mRNA pseudouridine synthesis	3	1	0.05	0.0518
GO:0045887	positive regulation of synaptic assembly...	3	1	0.05	0.0518
GO:0007213	G protein-coupled acetylcholine receptor...	3	1	0.05	0.0518
GO:0006265	DNA topological change	3	1	0.05	0.0518
GO:0006268	DNA unwinding involved in DNA replicatio...	3	1	0.05	0.0518
GO:0006334	nucleosome assembly	3	1	0.05	0.0518
GO:1902036	regulation of hematopoietic stem cell di...	3	1	0.05	0.0518
GO:0071816	tail-anchored membrane protein insertion...	3	1	0.05	0.0518
GO:0051220	cytoplasmic sequestering of protein	3	1	0.05	0.0518
GO:1903672	positive regulation of sprouting angioge...	3	1	0.05	0.0518
GO:0006298	mismatch repair	4	1	0.07	0.0684
GO:0006266	DNA ligation	4	1	0.07	0.0684
GO:0034587	piRNA metabolic process	4	1	0.07	0.0684
GO:0019048	modulation by virus of host process	4	1	0.07	0.0684
GO:0010499	proteasomal ubiquitin-independent protei...	4	1	0.07	0.0684
GO:0035093	spermatogenesis, exchange of chromosomal...	4	1	0.07	0.0684
GO:0051491	positive regulation of filopodium assemb...	4	1	0.07	0.0684
GO:0021772	olfactory bulb development	5	1	0.09	0.0848
GO:0032570	response to progesterone	5	1	0.09	0.0848
GO:0043161	proteasome-mediated ubiquitin-dependent ...	63	3	1.11	0.0964
GO:0048511	rhythmic process	29	3	0.51	0.112
GO:0051384	response to glucocorticoid	7	1	0.12	0.1167
GO:0051216	cartilage development	7	1	0.12	0.1167
GO:0007623	circadian rhythm	22	2	0.39	0.1298
GO:0007568	aging	8	1	0.14	0.1323
GO:0009411	response to UV	8	1	0.14	0.1323
GO:0010977	negative regulation of neuron projection...	9	1	0.16	0.1476
GO:0006368	transcription elongation from RNA polyme...	10	1	0.18	0.1626
GO:0001936	regulation of endothelial cell prolifera...	11	1	0.19	0.1774
GO:0042542	response to hydrogen peroxide	12	1	0.21	0.1919
GO:0006974	cellular response to DNA damage stimulus	61	3	1.07	0.2004
GO:0031532	actin cytoskeleton reorganization	13	1	0.23	0.2061
GO:0016579	protein deubiquitination	13	1	0.23	0.2061
GO:0042752	regulation of circadian rhythm	14	1	0.25	0.2202
GO:0031047	gene silencing by RNA	15	1	0.26	0.2339
GO:0051321	meiotic cell cycle	38	2	0.67	0.244
GO:0010529	negative regulation of transposition	17	1	0.3	0.2608
GO:0006511	ubiquitin-dependent protein catabolic pr...	82	4	1.44	0.2742
GO:0007052	mitotic spindle organization	19	1	0.33	0.2867
GO:0006417	regulation of translation	38	3	0.67	0.288
GO:0045944	positive regulation of transcription by ...	62	2	1.09	0.2973
GO:0009636	response to toxic substance	20	1	0.35	0.2993
GO:0048666	neuron development	116	2	2.04	0.3041
GO:0000819	sister chromatid segregation	22	1	0.39	0.324
GO:0010595	positive regulation of endothelial cell ...	22	1	0.39	0.324
GO:0043547	positive regulation of GTPase activity	24	1	0.42	0.3477
GO:0048589	developmental growth	72	3	1.26	0.3502
GO:0006486	protein glycosylation	71	2	1.25	0.3561
GO:0000278	mitotic cell cycle	114	2	2	0.3638
GO:0045471	response to ethanol	28	1	0.49	0.3928
GO:0032259	methylation	31	1	0.54	0.4247
GO:0007275	multicellular organism development	518	7	9.09	0.4321
GO:0007420	brain development	79	2	1.39	0.4433
GO:0006313	transposition, DNA-mediated	35	1	0.61	0.4646
GO:0006355	regulation of transcription, DNA-templat...	522	6	9.16	0.4947
GO:0005975	carbohydrate metabolic process	83	2	1.46	0.517
GO:0043065	positive regulation of apoptotic process	44	1	0.77	0.5448
GO:0042176	regulation of protein catabolic process	44	1	0.77	0.5448
GO:0034097	response to cytokine	50	1	0.88	0.5917
GO:0000226	microtubule cytoskeleton organization	80	2	1.4	0.6012
GO:0045087	innate immune response	66	1	1.16	0.6948
GO:0006310	DNA recombination	118	3	2.07	0.7338
GO:0051301	cell division	99	1	1.74	0.8338
GO:0045892	negative regulation of transcription, DN...	169	1	2.97	0.9557
GO:0006357	regulation of transcription by RNA polym...	458	5	8.04	0.994
GO:0051450	myoblast proliferation	2	1	0.04	1
GO:0051451	myoblast migration	2	1	0.04	1
GO:0097581	lamellipodium organization	3	1	0.05	1
GO:1905462	regulation of DNA duplex unwinding	1	1	0.02	1
GO:0044257	cellular protein catabolic process	100	5	1.76	1
GO:0048522	positive regulation of cellular process	398	6	6.99	1
GO:0036503	ERAD pathway	16	1	0.28	1
GO:0048523	negative regulation of cellular process	462	7	8.11	1
GO:0120031	plasma membrane bounded cell projection ...	70	2	1.23	1
GO:0009445	putrescine metabolic process	2	1	0.04	1
GO:0120032	regulation of plasma membrane bounded ce...	13	2	0.23	1
GO:0009446	putrescine biosynthetic process	2	1	0.04	1
GO:0034976	response to endoplasmic reticulum stress	25	1	0.44	1
GO:0036506	maintenance of unfolded protein	2	1	0.04	1
GO:0060537	muscle tissue development	43	1	0.75	1
GO:0120034	positive regulation of plasma membrane b...	9	2	0.16	1
GO:0060538	skeletal muscle organ development	11	1	0.19	1
GO:0120035	regulation of plasma membrane bounded ce...	44	2	0.77	1
GO:0012501	programmed cell death	146	1	2.56	1
GO:0044281	small molecule metabolic process	229	3	4.02	1
GO:0097305	response to alcohol	41	2	0.72	1
GO:0120036	plasma membrane bounded cell projection ...	157	2	2.76	1
GO:0019692	deoxyribose phosphate metabolic process	3	1	0.05	1
GO:0097306	cellular response to alcohol	15	1	0.26	1
GO:0006400	tRNA modification	14	2	0.25	1
GO:0010631	epithelial cell migration	34	1	0.6	1
GO:1901575	organic substance catabolic process	252	6	4.42	1
GO:0010975	regulation of neuron projection developm...	33	1	0.58	1
GO:0010632	regulation of epithelial cell migration	27	1	0.47	1
GO:1901576	organic substance biosynthetic process	839	16	14.73	1
GO:0019752	carboxylic acid metabolic process	103	1	1.81	1
GO:0043067	regulation of programmed cell death	115	1	2.02	1
GO:0043068	positive regulation of programmed cell d...	44	1	0.77	1
GO:0010634	positive regulation of epithelial cell m...	23	1	0.4	1
GO:0022900	electron transport chain	13	1	0.23	1
GO:0014855	striated muscle cell proliferation	11	1	0.19	1
GO:0014856	skeletal muscle cell proliferation	4	1	0.07	1
GO:0044003	modulation by symbiont of host process	4	1	0.07	1
GO:0014857	regulation of skeletal muscle cell proli...	3	1	0.05	1
GO:0048513	animal organ development	329	5	5.77	1
GO:0010638	positive regulation of organelle organiz...	38	1	0.67	1
GO:0022904	respiratory electron transport chain	12	1	0.21	1
GO:0048514	blood vessel morphogenesis	75	1	1.32	1
GO:0010639	negative regulation of organelle organiz...	24	1	0.42	1
GO:0051489	regulation of filopodium assembly	6	1	0.11	1
GO:0048515	spermatid differentiation	13	2	0.23	1
GO:0014859	negative regulation of skeletal muscle c...	1	1	0.02	1
GO:0006730	one-carbon metabolic process	3	1	0.05	1
GO:0002690	positive regulation of leukocyte chemota...	3	1	0.05	1
GO:0048518	positive regulation of biological proces...	452	6	7.93	1
GO:0044271	cellular nitrogen compound biosynthetic ...	690	13	12.11	1
GO:0048519	negative regulation of biological proces...	509	7	8.93	1
GO:0007127	meiosis I	13	1	0.23	1
GO:0044275	cellular carbohydrate catabolic process	9	1	0.16	1
GO:0071495	cellular response to endogenous stimulus	104	1	1.83	1
GO:0010927	cellular component assembly involved in ...	22	1	0.39	1
GO:0009725	response to hormone	65	2	1.14	1
GO:0001522	pseudouridine synthesis	5	1	0.09	1
GO:0040011	locomotion	164	2	2.88	1
GO:0097529	myeloid leukocyte migration	8	1	0.14	1
GO:0001525	angiogenesis	68	1	1.19	1
GO:0009991	response to extracellular stimulus	38	1	0.67	1
GO:0048545	response to steroid hormone	30	2	0.53	1
GO:0040012	regulation of locomotion	66	2	1.16	1
GO:0031323	regulation of cellular metabolic process	717	11	12.58	1
GO:0031324	negative regulation of cellular metaboli...	243	3	4.27	1
GO:0031325	positive regulation of cellular metaboli...	201	3	3.53	1
GO:0031326	regulation of cellular biosynthetic proc...	582	10	10.22	1
GO:0040017	positive regulation of locomotion	48	2	0.84	1
GO:0031327	negative regulation of cellular biosynth...	198	3	3.48	1
GO:0009653	anatomical structure morphogenesis	281	2	4.93	1
GO:0031328	positive regulation of cellular biosynth...	103	3	1.81	1
GO:0043085	positive regulation of catalytic activit...	78	2	1.37	1
GO:0006629	lipid metabolic process	139	1	2.44	1
GO:0043087	regulation of GTPase activity	28	1	0.49	1
GO:0021988	olfactory lobe development	5	1	0.09	1
GO:0021700	developmental maturation	31	1	0.54	1
GO:0006950	response to stress	348	5	6.11	1
GO:1904396	regulation of neuromuscular junction dev...	9	1	0.16	1
GO:0006952	defense response	147	1	2.58	1
GO:1904398	positive regulation of neuromuscular jun...	3	1	0.05	1
GO:0048534	hematopoietic or lymphoid organ developm...	97	1	1.7	1
GO:0035239	tube morphogenesis	96	1	1.68	1
GO:0009719	response to endogenous stimulus	123	2	2.16	1
GO:0006955	immune response	156	1	2.74	1
GO:0008033	tRNA processing	20	2	0.35	1
GO:0090304	nucleic acid metabolic process	852	19	14.95	1
GO:0019438	aromatic compound biosynthetic process	604	10	10.6	1
GO:0010941	regulation of cell death	125	1	2.19	1
GO:0010942	positive regulation of cell death	51	1	0.9	1
GO:0033993	response to lipid	54	2	0.95	1
GO:2001014	regulation of skeletal muscle cell diffe...	1	1	0.02	1
GO:2001015	negative regulation of skeletal muscle c...	1	1	0.02	1
GO:0072657	protein localization to membrane	55	2	0.97	1
GO:0010604	positive regulation of macromolecule met...	236	3	4.14	1
GO:0010605	negative regulation of macromolecule met...	269	4	4.72	1
GO:0061061	muscle structure development	59	1	1.04	1
GO:0140013	meiotic nuclear division	17	1	0.3	1
GO:0010608	post-transcriptional regulation of gene ...	49	3	0.86	1
GO:0007131	reciprocal meiotic recombination	7	1	0.12	1
GO:0045927	positive regulation of growth	25	1	0.44	1
GO:0070887	cellular response to chemical stimulus	227	3	3.98	1
GO:0031344	regulation of cell projection organizati...	45	2	0.79	1
GO:0031345	negative regulation of cell projection o...	9	1	0.16	1
GO:1901532	regulation of hematopoietic progenitor c...	6	1	0.11	1
GO:0031346	positive regulation of cell projection o...	24	2	0.42	1
GO:0097530	granulocyte migration	3	1	0.05	1
GO:0014812	muscle cell migration	5	1	0.09	1
GO:0048468	cell development	202	6	3.55	1
GO:0044248	cellular catabolic process	229	6	4.02	1
GO:0048469	cell maturation	20	1	0.35	1
GO:0044249	cellular biosynthetic process	826	16	14.5	1
GO:0014816	skeletal muscle satellite cell different...	2	1	0.04	1
GO:0046847	filopodium assembly	7	1	0.12	1
GO:0006979	response to oxidative stress	29	1	0.51	1
GO:0045893	positive regulation of transcription, DN...	83	2	1.46	1
GO:0014841	skeletal muscle satellite cell prolifera...	4	1	0.07	1
GO:0014842	regulation of skeletal muscle satellite ...	3	1	0.05	1
GO:0008283	cell population proliferation	146	2	2.56	1
GO:0030703	eggshell formation	4	1	0.07	1
GO:0044237	cellular metabolic process	1499	31	26.31	1
GO:0042127	regulation of cell population proliferat...	126	2	2.21	1
GO:1902680	positive regulation of RNA biosynthetic ...	83	2	1.46	1
GO:0044238	primary metabolic process	1464	30	25.7	1
GO:0009628	response to abiotic stimulus	102	1	1.79	1
GO:0008285	negative regulation of cell population p...	39	1	0.68	1
GO:0060429	epithelium development	108	2	1.9	1
GO:0006921	cellular component disassembly involved ...	2	1	0.04	1
GO:0030707	ovarian follicle cell development	12	1	0.21	1
GO:0032501	multicellular organismal process	679	9	11.92	1
GO:0032502	developmental process	608	10	10.67	1
GO:0050803	regulation of synapse structure or activ...	32	1	0.56	1
GO:1902743	regulation of lamellipodium organization	2	1	0.04	1
GO:0032504	multicellular organism reproduction	130	3	2.28	1
GO:0006928	movement of cell or subcellular componen...	177	2	3.11	1
GO:1902745	positive regulation of lamellipodium org...	2	1	0.04	1
GO:0002682	regulation of immune system process	160	1	2.81	1
GO:0050807	regulation of synapse organization	29	1	0.51	1
GO:0043043	peptide biosynthetic process	69	3	1.21	1
GO:0050808	synapse organization	50	1	0.88	1
GO:0032508	DNA duplex unwinding	8	2	0.14	1
GO:0051668	localization within membrane	62	2	1.09	1
GO:0002684	positive regulation of immune system pro...	56	1	0.98	1
GO:0002685	regulation of leukocyte migration	9	1	0.16	1
GO:0007051	spindle organization	24	1	0.42	1
GO:1905777	regulation of exonuclease activity	1	1	0.02	1
GO:0002687	positive regulation of leukocyte migrati...	5	1	0.09	1
GO:0046073	dTMP metabolic process	1	1	0.02	1
GO:0002688	regulation of leukocyte chemotaxis	4	1	0.07	1
GO:0045184	establishment of protein localization	166	1	2.91	1
GO:1905779	positive regulation of exonuclease activ...	1	1	0.02	1
GO:2001251	negative regulation of chromosome organi...	9	1	0.16	1
GO:0007399	nervous system development	222	3	3.9	1
GO:0045185	maintenance of protein location	13	1	0.23	1
GO:0046075	dTTP metabolic process	1	1	0.02	1
GO:2000736	regulation of stem cell differentiation	8	1	0.14	1
GO:0045934	negative regulation of nucleobase-contai...	185	1	3.25	1
GO:0007059	chromosome segregation	37	1	0.65	1
GO:0006915	apoptotic process	143	1	2.51	1
GO:0045935	positive regulation of nucleobase-contai...	112	3	1.97	1
GO:0014070	response to organic cyclic compound	83	2	1.46	1
GO:1904018	positive regulation of vasculature devel...	17	1	0.3	1
GO:1902679	negative regulation of RNA biosynthetic ...	170	1	2.98	1
GO:0009987	cellular process	2068	37	36.3	1
GO:0040007	growth	98	3	1.72	1
GO:0040008	regulation of growth	71	1	1.25	1
GO:0051716	cellular response to stimulus	582	7	10.22	1
GO:0048477	oogenesis	29	1	0.51	1
GO:0065003	protein-containing complex assembly	115	1	2.02	1
GO:0065004	protein-DNA complex assembly	10	1	0.18	1
GO:0001501	skeletal system development	34	1	0.6	1
GO:0065007	biological regulation	1290	17	22.64	1
GO:0030163	protein catabolic process	114	5	2	1
GO:0061024	membrane organization	63	2	1.11	1
GO:0065008	regulation of biological quality	314	3	5.51	1
GO:0031589	cell-substrate adhesion	18	1	0.32	1
GO:0065009	regulation of molecular function	170	2	2.98	1
GO:0019953	sexual reproduction	123	3	2.16	1
GO:0008210	estrogen metabolic process	9	1	0.16	1
GO:0070085	glycosylation	71	2	1.25	1
GO:0008216	spermidine metabolic process	2	1	0.04	1
GO:0030154	cell differentiation	358	8	6.28	1
GO:0030155	regulation of cell adhesion	77	1	1.35	1
GO:0006935	chemotaxis	55	1	0.97	1
GO:0071695	anatomical structure maturation	25	1	0.44	1
GO:0008219	cell death	154	1	2.7	1
GO:0051674	localization of cell	113	2	1.98	1
GO:0048699	generation of neurons	134	2	2.35	1
GO:0008582	regulation of synaptic assembly at neuro...	8	1	0.14	1
GO:0046385	deoxyribose phosphate biosynthetic proce...	3	1	0.05	1
GO:0019646	aerobic electron transport chain	6	1	0.11	1
GO:0051960	regulation of nervous system development	35	1	0.61	1
GO:0010821	regulation of mitochondrion organization	2	1	0.04	1
GO:0009162	deoxyribonucleoside monophosphate metabo...	4	1	0.07	1
GO:0010822	positive regulation of mitochondrion org...	1	1	0.02	1
GO:0030182	neuron differentiation	129	2	2.26	1
GO:0051962	positive regulation of nervous system de...	21	1	0.37	1
GO:0051963	regulation of synapse assembly	18	1	0.32	1
GO:0009165	nucleotide biosynthetic process	37	2	0.65	1
GO:0007029	endoplasmic reticulum organization	8	1	0.14	1
GO:0051965	positive regulation of synapse assembly	6	1	0.11	1
GO:0007292	female gamete generation	35	1	0.61	1
GO:0032781	positive regulation of ATP-dependent act...	4	1	0.07	1
GO:0007010	cytoskeleton organization	159	3	2.79	1
GO:0009890	negative regulation of biosynthetic proc...	200	3	3.51	1
GO:0009891	positive regulation of biosynthetic proc...	106	3	1.86	1
GO:0009892	negative regulation of metabolic process	286	4	5.02	1
GO:0019637	organophosphate metabolic process	109	2	1.91	1
GO:0009893	positive regulation of metabolic process	258	3	4.53	1
GO:0010810	regulation of cell-substrate adhesion	9	1	0.16	1
GO:1901698	response to nitrogen compound	98	3	1.72	1
GO:0046034	ATP metabolic process	28	1	0.49	1
GO:0009894	regulation of catabolic process	79	1	1.39	1
GO:0010811	positive regulation of cell-substrate ad...	6	1	0.11	1
GO:1901699	cellular response to nitrogen compound	53	1	0.93	1
GO:0009157	deoxyribonucleoside monophosphate biosyn...	3	1	0.05	1
GO:0010817	regulation of hormone levels	44	1	0.77	1
GO:0031497	chromatin assembly	6	1	0.11	1
GO:0032774	RNA biosynthetic process	535	6	9.39	1
GO:0009605	response to external stimulus	222	3	3.9	1
GO:0045132	meiotic chromosome segregation	7	1	0.12	1
GO:0009607	response to biotic stimulus	99	1	1.74	1
GO:0006119	oxidative phosphorylation	13	1	0.23	1
GO:0007049	cell cycle	210	4	3.69	1
GO:0006091	generation of precursor metabolites and ...	46	1	0.81	1
GO:0051641	cellular localization	275	2	4.83	1
GO:0098926	postsynaptic signal transduction	8	1	0.14	1
GO:0051701	biological process involved in interacti...	18	1	0.32	1
GO:0055123	digestive system development	17	1	0.3	1
GO:0051707	response to other organism	97	1	1.7	1
GO:0030855	epithelial cell differentiation	57	2	1	1
GO:0030900	forebrain development	46	1	0.81	1
GO:0019941	modification-dependent protein catabolic...	83	4	1.46	1
GO:0009176	pyrimidine deoxyribonucleoside monophosp...	3	1	0.05	1
GO:0009177	pyrimidine deoxyribonucleoside monophosp...	3	1	0.05	1
GO:0007267	cell-cell signaling	146	1	2.56	1
GO:0008202	steroid metabolic process	40	1	0.7	1
GO:0030097	hemopoiesis	95	1	1.67	1
GO:0009123	nucleoside monophosphate metabolic proce...	11	1	0.19	1
GO:0009124	nucleoside monophosphate biosynthetic pr...	8	1	0.14	1
GO:0006139	nucleobase-containing compound metabolic...	926	20	16.25	1
GO:0001667	ameboidal-type cell migration	38	1	0.67	1
GO:0061008	hepaticobiliary system development	18	1	0.32	1
GO:0009129	pyrimidine nucleoside monophosphate meta...	6	1	0.11	1
GO:0140527	reciprocal homologous recombination	7	1	0.12	1
GO:1901654	response to ketone	18	2	0.32	1
GO:0022008	neurogenesis	149	2	2.62	1
GO:1901655	cellular response to ketone	8	1	0.14	1
GO:0098609	cell-cell adhesion	89	1	1.56	1
GO:1901657	glycosyl compound metabolic process	8	1	0.14	1
GO:0071407	cellular response to organic cyclic comp...	46	1	0.81	1
GO:1901658	glycosyl compound catabolic process	2	1	0.04	1
GO:0009112	nucleobase metabolic process	5	1	0.09	1
GO:0071674	mononuclear cell migration	7	1	0.12	1
GO:0097659	nucleic acid-templated transcription	535	6	9.39	1
GO:0048731	system development	436	5	7.65	1
GO:0071675	regulation of mononuclear cell migration	5	1	0.09	1
GO:0007281	germ cell development	44	3	0.77	1
GO:0048732	gland development	40	1	0.7	1
GO:0007283	spermatogenesis	80	2	1.4	1
GO:0009117	nucleotide metabolic process	71	2	1.25	1
GO:0015980	energy derivation by oxidation of organi...	31	1	0.54	1
GO:0007286	spermatid development	13	2	0.23	1
GO:0007289	spermatid nucleus differentiation	5	2	0.09	1
GO:1900262	regulation of DNA-directed DNA polymeras...	1	1	0.02	1
GO:0007005	mitochondrion organization	39	1	0.68	1
GO:0071621	granulocyte chemotaxis	3	1	0.05	1
GO:0009141	nucleoside triphosphate metabolic proces...	12	1	0.21	1
GO:0071622	regulation of granulocyte chemotaxis	2	1	0.04	1
GO:0009142	nucleoside triphosphate biosynthetic pro...	9	1	0.16	1
GO:0016137	glycoside metabolic process	2	1	0.04	1
GO:0009888	tissue development	171	4	3	1
GO:0044419	biological process involved in interspec...	113	2	1.98	1
GO:0009889	regulation of biosynthetic process	587	10	10.3	1
GO:0016139	glycoside catabolic process	1	1	0.02	1
GO:0006396	RNA processing	89	2	1.56	1
GO:0051603	proteolysis involved in cellular protein...	93	5	1.63	1
GO:0009147	pyrimidine nucleoside triphosphate metab...	7	1	0.12	1
GO:0009148	pyrimidine nucleoside triphosphate biosy...	4	1	0.07	1
GO:0006399	tRNA metabolic process	28	2	0.49	1
GO:0007276	gamete generation	117	3	2.05	1
GO:0007338	single fertilization	7	1	0.12	1
GO:0009130	pyrimidine nucleoside monophosphate bios...	6	1	0.11	1
GO:2000112	regulation of cellular macromolecule bio...	46	3	0.81	1
GO:2000113	negative regulation of cellular macromol...	19	2	0.33	1
GO:1902850	microtubule cytoskeleton organization in...	23	1	0.4	1
GO:0006082	organic acid metabolic process	105	1	1.84	1
GO:0051171	regulation of nitrogen compound metaboli...	692	12	12.15	1
GO:0099536	synaptic signaling	87	1	1.53	1
GO:0043542	endothelial cell migration	27	1	0.47	1
GO:0051172	negative regulation of nitrogen compound...	237	3	4.16	1
GO:1903046	meiotic cell cycle process	22	1	0.39	1
GO:0051173	positive regulation of nitrogen compound...	191	3	3.35	1
GO:1903047	mitotic cell cycle process	89	1	1.56	1
GO:0010033	response to organic substance	241	5	4.23	1
GO:0010035	response to inorganic substance	65	1	1.14	1
GO:0032196	transposition	83	2	1.46	1
GO:0000280	nuclear division	45	1	0.79	1
GO:0051179	localization	546	4	9.58	1
GO:2000145	regulation of cell motility	57	2	1	1
GO:0016052	carbohydrate catabolic process	29	1	0.51	1
GO:0048646	anatomical structure formation involved ...	137	2	2.4	1
GO:0043207	response to external biotic stimulus	97	1	1.7	1
GO:2000147	positive regulation of cell motility	42	2	0.74	1
GO:0009060	aerobic respiration	19	1	0.33	1
GO:0071704	organic substance metabolic process	1561	30	27.4	1
GO:0032989	cellular component morphogenesis	92	1	1.61	1
GO:0034329	cell junction assembly	36	1	0.63	1
GO:0009064	glutamine family amino acid metabolic pr...	9	1	0.16	1
GO:0001952	regulation of cell-matrix adhesion	5	1	0.09	1
GO:0000002	mitochondrial genome maintenance	4	1	0.07	1
GO:0000003	reproduction	207	4	3.63	1
GO:0002097	tRNA wobble base modification	4	1	0.07	1
GO:0051124	synaptic assembly at neuromuscular junct...	8	1	0.14	1
GO:0001954	positive regulation of cell-matrix adhes...	4	1	0.07	1
GO:0010591	regulation of lamellipodium assembly	2	1	0.04	1
GO:0051128	regulation of cellular component organiz...	174	4	3.05	1
GO:0007584	response to nutrient	15	1	0.26	1
GO:0010594	regulation of endothelial cell migration	25	1	0.44	1
GO:0051129	negative regulation of cellular componen...	49	2	0.86	1
GO:0055086	nucleobase-containing small molecule met...	80	2	1.4	1
GO:0006366	transcription by RNA polymerase II	469	5	8.23	1
GO:0009394	2'-deoxyribonucleotide metabolic process	3	1	0.05	1
GO:0097194	execution phase of apoptosis	6	1	0.11	1
GO:0048638	regulation of developmental growth	41	1	0.72	1
GO:0048639	positive regulation of developmental gro...	18	1	0.32	1
GO:0010256	endomembrane system organization	53	1	0.93	1
GO:0090407	organophosphate biosynthetic process	61	2	1.07	1
GO:0007304	chorion-containing eggshell formation	4	1	0.07	1
GO:1901700	response to oxygen-containing compound	120	4	2.11	1
GO:0045048	protein insertion into ER membrane	5	1	0.09	1
GO:1901701	cellular response to oxygen-containing c...	79	2	1.39	1
GO:0007306	eggshell chorion assembly	3	1	0.05	1
GO:0009056	catabolic process	274	6	4.81	1
GO:0009057	macromolecule catabolic process	149	5	2.62	1
GO:0090673	endothelial cell-matrix adhesion	2	1	0.04	1
GO:0009058	biosynthetic process	853	16	14.97	1
GO:0090674	endothelial cell-matrix adhesion via fib...	2	1	0.04	1
GO:0009100	glycoprotein metabolic process	82	2	1.44	1
GO:0006351	transcription, DNA-templated	534	6	9.37	1
GO:0009059	macromolecule biosynthetic process	704	13	12.36	1
GO:0009101	glycoprotein biosynthetic process	78	2	1.37	1
GO:0016070	RNA metabolic process	628	8	11.02	1
GO:0006354	DNA-templated transcription, elongation	12	1	0.21	1
GO:0016071	mRNA metabolic process	62	1	1.09	1
GO:0043462	regulation of ATP-dependent activity	6	1	0.11	1
GO:0051093	negative regulation of developmental pro...	103	1	1.81	1
GO:0051094	positive regulation of developmental pro...	89	2	1.56	1
GO:0051095	regulation of helicase activity	1	1	0.02	1
GO:0042330	taxis	56	1	0.98	1
GO:0044403	biological process involved in symbiotic...	25	1	0.44	1
GO:0006807	nitrogen compound metabolic process	1399	28	24.56	1
GO:0034330	cell junction organization	70	1	1.23	1
GO:0030029	actin filament-based process	70	1	1.23	1
GO:0007528	neuromuscular junction development	18	1	0.32	1
GO:0050790	regulation of catalytic activity	118	2	2.07	1
GO:0042221	response to chemical	351	6	6.16	1
GO:0098813	nuclear chromosome segregation	28	1	0.49	1
GO:0071897	DNA biosynthetic process	21	2	0.37	1
GO:0050793	regulation of developmental process	231	4	4.05	1
GO:0051130	positive regulation of cellular componen...	77	3	1.35	1
GO:0002064	epithelial cell development	36	2	0.63	1
GO:0050794	regulation of cellular process	1169	14	20.52	1
GO:0045595	regulation of cell differentiation	136	2	2.39	1
GO:0002065	columnar/cuboidal epithelial cell differ...	6	1	0.11	1
GO:1902392	regulation of exodeoxyribonuclease activ...	1	1	0.02	1
GO:0002066	columnar/cuboidal epithelial cell develo...	5	1	0.09	1
GO:0045596	negative regulation of cell differentiat...	79	1	1.39	1
GO:1905144	response to acetylcholine	7	1	0.12	1
GO:0002069	columnar/cuboidal epithelial cell matura...	1	1	0.02	1
GO:1905145	cellular response to acetylcholine	7	1	0.12	1
GO:0031667	response to nutrient levels	37	1	0.65	1
GO:2000105	positive regulation of DNA-templated DNA...	1	1	0.02	1
GO:0003006	developmental process involved in reprod...	157	3	2.76	1
GO:0007517	muscle organ development	31	1	0.54	1
GO:0048609	multicellular organismal reproductive pr...	130	3	2.28	1
GO:0007519	skeletal muscle tissue development	9	1	0.16	1
GO:0043486	histone exchange	8	1	0.14	1
GO:0000302	response to reactive oxygen species	16	1	0.28	1
GO:0042558	pteridine-containing compound metabolic ...	3	1	0.05	1
GO:1901890	positive regulation of cell junction ass...	7	1	0.12	1
GO:0006261	DNA-templated DNA replication	10	2	0.18	1
GO:0006264	mitochondrial DNA replication	2	1	0.04	1
GO:0007498	mesoderm development	22	1	0.39	1
GO:0006325	chromatin organization	36	2	0.63	1
GO:0010556	regulation of macromolecule biosynthetic...	569	10	9.99	1
GO:0010557	positive regulation of macromolecule bio...	95	3	1.67	1
GO:0016043	cellular component organization	530	9	9.3	1
GO:0030030	cell projection organization	160	2	2.81	1
GO:0010558	negative regulation of macromolecule bio...	192	3	3.37	1
GO:0030031	cell projection assembly	70	2	1.23	1
GO:0030032	lamellipodium assembly	2	1	0.04	1
GO:0006595	polyamine metabolic process	3	1	0.05	1
GO:1901605	alpha-amino acid metabolic process	31	1	0.54	1
GO:0001941	postsynaptic membrane organization	2	1	0.04	1
GO:0033365	protein localization to organelle	79	1	1.39	1
GO:0030036	actin cytoskeleton organization	62	1	1.09	1
GO:0042246	tissue regeneration	8	1	0.14	1
GO:0006596	polyamine biosynthetic process	2	1	0.04	1
GO:0001944	vasculature development	84	1	1.47	1
GO:0030261	chromosome condensation	8	1	0.14	1
GO:0030262	apoptotic nuclear changes	2	1	0.04	1
GO:0045333	cellular respiration	24	1	0.42	1
GO:0034248	regulation of cellular amide metabolic p...	46	3	0.81	1
GO:0034249	negative regulation of cellular amide me...	23	2	0.4	1
GO:0006259	DNA metabolic process	266	12	4.67	1
GO:0016032	viral process	45	1	0.79	1
GO:0051052	regulation of DNA metabolic process	44	2	0.77	1
GO:0048863	stem cell differentiation	15	1	0.26	1
GO:0010243	response to organonitrogen compound	92	2	1.61	1
GO:0035914	skeletal muscle cell differentiation	3	1	0.05	1
GO:0051054	positive regulation of DNA metabolic pro...	21	1	0.37	1
GO:0002070	epithelial cell maturation	3	1	0.05	1
GO:0048869	cellular developmental process	361	8	6.34	1
GO:0006281	DNA repair	48	2	0.84	1
GO:0072359	circulatory system development	138	1	2.42	1
GO:2000026	regulation of multicellular organismal d...	140	2	2.46	1
GO:0030595	leukocyte chemotaxis	6	1	0.11	1
GO:2000291	regulation of myoblast proliferation	2	1	0.04	1
GO:0001935	endothelial cell proliferation	11	1	0.19	1
GO:0045229	external encapsulating structure organiz...	28	1	0.49	1
GO:0043412	macromolecule modification	395	6	6.93	1
GO:0043413	macromolecule glycosylation	71	2	1.25	1
GO:0031960	response to corticosteroid	10	1	0.18	1
GO:0048856	anatomical structure development	581	10	10.2	1
GO:0046483	heterocycle metabolic process	950	20	16.67	1
GO:1901860	positive regulation of mitochondrial DNA...	1	1	0.02	1
GO:0006271	DNA strand elongation involved in DNA re...	1	1	0.02	1
GO:0033043	regulation of organelle organization	82	2	1.44	1
GO:0033044	regulation of chromosome organization	17	1	0.3	1
GO:0016310	phosphorylation	132	1	2.32	1
GO:0033388	putrescine biosynthetic process from arg...	1	1	0.02	1
GO:0009262	deoxyribonucleotide metabolic process	6	2	0.11	1
GO:0006277	DNA amplification	1	1	0.02	1
GO:0090150	establishment of protein localization to...	27	1	0.47	1
GO:0009265	2'-deoxyribonucleotide biosynthetic proc...	3	1	0.05	1
GO:0006338	chromatin remodeling	20	2	0.35	1
GO:0010528	regulation of transposition	17	1	0.3	1
GO:0095500	acetylcholine receptor signaling pathway	7	1	0.12	1
GO:0006220	pyrimidine nucleotide metabolic process	8	1	0.14	1
GO:0019389	glucuronoside metabolic process	1	1	0.02	1
GO:0006221	pyrimidine nucleotide biosynthetic proce...	7	1	0.12	1
GO:0050789	regulation of biological process	1223	15	21.47	1
GO:0033036	macromolecule localization	266	2	4.67	1
GO:1901858	regulation of mitochondrial DNA metaboli...	1	1	0.02	1
GO:0048870	cell motility	113	2	1.98	1
GO:0030334	regulation of cell migration	55	2	0.97	1
GO:0002040	sprouting angiogenesis	11	1	0.19	1
GO:0032870	cellular response to hormone stimulus	42	1	0.74	1
GO:0009314	response to radiation	30	1	0.53	1
GO:0030335	positive regulation of cell migration	41	2	0.72	1
GO:0043436	oxoacid metabolic process	103	1	1.81	1
GO:0010498	proteasomal protein catabolic process	71	4	1.25	1
GO:0032879	regulation of localization	192	2	3.37	1
GO:0031647	regulation of protein stability	23	1	0.4	1
GO:1901888	regulation of cell junction assembly	21	1	0.37	1
GO:0008610	lipid biosynthetic process	62	1	1.09	1
GO:0071824	protein-DNA complex subunit organization	20	2	0.35	1
GO:0002376	immune system process	242	3	4.25	1
GO:0080090	regulation of primary metabolic process	704	12	12.36	1
GO:0001889	liver development	17	1	0.3	1
GO:0006301	postreplication repair	3	1	0.05	1
GO:0022411	cellular component disassembly	38	1	0.67	1
GO:0022412	cellular process involved in reproductio...	49	3	0.86	1
GO:0022414	reproductive process	202	4	3.55	1
GO:1901135	carbohydrate derivative metabolic proces...	171	5	3	1
GO:1901136	carbohydrate derivative catabolic proces...	15	1	0.26	1
GO:1901137	carbohydrate derivative biosynthetic pro...	120	4	2.11	1
GO:0071390	cellular response to ecdysone	1	1	0.02	1
GO:0032069	regulation of nuclease activity	3	1	0.05	1
GO:0006575	cellular modified amino acid metabolic p...	24	1	0.42	1
GO:0016556	mRNA modification	6	1	0.11	1
GO:0006576	cellular biogenic amine metabolic proces...	15	1	0.26	1
GO:0033002	muscle cell proliferation	23	1	0.4	1
GO:0009221	pyrimidine deoxyribonucleotide biosynthe...	3	1	0.05	1
GO:0009566	fertilization	8	1	0.14	1
GO:0032392	DNA geometric change	9	2	0.16	1
GO:0071396	cellular response to lipid	34	1	0.6	1
GO:0071840	cellular component organization or bioge...	569	9	9.99	1
GO:0061448	connective tissue development	13	1	0.23	1
GO:0043401	steroid hormone mediated signaling pathw...	14	1	0.25	1
GO:0043403	skeletal muscle tissue regeneration	2	1	0.04	1
GO:0033273	response to vitamin	7	1	0.12	1
GO:0006520	cellular amino acid metabolic process	38	1	0.67	1
GO:0071103	DNA conformation change	10	2	0.18	1
GO:0006525	arginine metabolic process	1	1	0.02	1
GO:0032101	regulation of response to external stimu...	70	1	1.23	1
GO:0007416	synapse assembly	23	1	0.4	1
GO:0007417	central nervous system development	103	2	1.81	1
GO:0032103	positive regulation of response to exter...	36	1	0.63	1
GO:0010467	gene expression	786	9	13.8	1
GO:0010468	regulation of gene expression	670	9	11.76	1
GO:0009211	pyrimidine deoxyribonucleoside triphosph...	3	1	0.05	1
GO:0030575	nuclear body organization	1	1	0.02	1
GO:0009212	pyrimidine deoxyribonucleoside triphosph...	1	1	0.02	1
GO:0050673	epithelial cell proliferation	33	1	0.58	1
GO:2000278	regulation of DNA biosynthetic process	9	1	0.16	1
GO:0009219	pyrimidine deoxyribonucleotide metabolic...	3	1	0.05	1
GO:0050678	regulation of epithelial cell proliferat...	28	1	0.49	1
GO:0030522	intracellular receptor signaling pathway	19	1	0.33	1
GO:0051252	regulation of RNA metabolic process	551	6	9.67	1
GO:0051253	negative regulation of RNA metabolic pro...	175	1	3.07	1
GO:0036314	response to sterol	7	1	0.12	1
GO:0006518	peptide metabolic process	96	3	1.68	1
GO:0051254	positive regulation of RNA metabolic pro...	99	2	1.74	1
GO:0035825	homologous recombination	7	1	0.12	1
GO:0036315	cellular response to sterol	2	1	0.04	1
GO:0019222	regulation of metabolic process	807	12	14.16	1
GO:0046653	tetrahydrofolate metabolic process	2	1	0.04	1
GO:0090130	tissue migration	34	1	0.6	1
GO:0032070	regulation of deoxyribonuclease activity	3	1	0.05	1
GO:0033554	cellular response to stress	169	4	2.97	1
GO:0090132	epithelium migration	34	1	0.6	1
GO:0021537	telencephalon development	26	1	0.46	1
GO:0044093	positive regulation of molecular functio...	115	2	2.02	1
GO:0120178	steroid hormone biosynthetic process	5	1	0.09	1
GO:0032075	positive regulation of nuclease activity	2	1	0.04	1
GO:0032077	positive regulation of deoxyribonuclease...	2	1	0.04	1
GO:0009308	amine metabolic process	16	1	0.28	1
GO:0009309	amine biosynthetic process	6	1	0.11	1
GO:0008150	biological_process	2165	38	38	1
GO:0034470	ncRNA processing	46	2	0.81	1
GO:0008152	metabolic process	1608	31	28.22	1
GO:1903506	regulation of nucleic acid-templated tra...	523	6	9.18	1
GO:0006206	pyrimidine nucleobase metabolic process	2	1	0.04	1
GO:1903507	negative regulation of nucleic acid-temp...	170	1	2.98	1
GO:1903508	positive regulation of nucleic acid-temp...	83	2	1.46	1
GO:0030518	intracellular steroid hormone receptor s...	13	1	0.23	1
GO:0051345	positive regulation of hydrolase activit...	37	2	0.65	1
GO:0051347	positive regulation of transferase activ...	37	1	0.65	1
GO:0019219	regulation of nucleobase-containing comp...	571	8	10.02	1
GO:0031175	neuron projection development	96	1	1.68	1
GO:0051270	regulation of cellular component movemen...	65	2	1.14	1
GO:0060322	head development	79	2	1.39	1
GO:0051272	positive regulation of cellular componen...	42	2	0.74	1
GO:0060326	cell chemotaxis	13	1	0.23	1
GO:0022402	cell cycle process	131	2	2.3	1
GO:0051276	chromosome organization	78	4	1.37	1
GO:1901360	organic cyclic compound metabolic proces...	991	21	17.39	1
GO:1901362	organic cyclic compound biosynthetic pro...	626	11	10.99	1
GO:0051336	regulation of hydrolase activity	49	2	0.86	1
GO:0051338	regulation of transferase activity	59	1	1.04	1
GO:0070727	cellular macromolecule localization	161	2	2.83	1
GO:0060255	regulation of macromolecule metabolic pr...	755	12	13.25	1
GO:0043632	modification-dependent macromolecule cat...	88	4	1.54	1
GO:2000573	positive regulation of DNA biosynthetic ...	6	1	0.11	1
GO:0071383	cellular response to steroid hormone sti...	18	1	0.32	1
GO:0034754	cellular hormone metabolic process	22	1	0.39	1
GO:1901293	nucleoside phosphate biosynthetic proces...	39	2	0.68	1
GO:0072527	pyrimidine-containing compound metabolic...	8	1	0.14	1
GO:0002244	hematopoietic progenitor cell differenti...	12	1	0.21	1
GO:0072528	pyrimidine-containing compound biosynthe...	7	1	0.12	1
GO:0006464	cellular protein modification process	371	4	6.51	1
GO:0032042	mitochondrial DNA metabolic process	3	1	0.05	1
GO:0006468	protein phosphorylation	117	1	2.05	1
GO:0036211	protein modification process	371	4	6.51	1
GO:0010758	regulation of macrophage chemotaxis	1	1	0.02	1
GO:0035075	response to ecdysone	1	1	0.02	1
GO:0006793	phosphorus metabolic process	252	3	4.42	1
GO:0050920	regulation of chemotaxis	11	1	0.19	1
GO:0009200	deoxyribonucleoside triphosphate metabol...	3	1	0.05	1
GO:0050921	positive regulation of chemotaxis	7	1	0.12	1
GO:0042445	hormone metabolic process	27	1	0.47	1
GO:0042446	hormone biosynthetic process	10	1	0.18	1
GO:0009202	deoxyribonucleoside triphosphate biosynt...	1	1	0.02	1
GO:0006796	phosphate-containing compound metabolic ...	248	3	4.35	1
GO:0031099	regeneration	27	2	0.47	1
GO:0042773	ATP synthesis coupled electron transport	10	1	0.18	1
GO:0051240	positive regulation of multicellular org...	120	2	2.11	1
GO:0002520	immune system development	102	1	1.79	1
GO:0042775	mitochondrial ATP synthesis coupled elec...	9	1	0.16	1
GO:0022616	DNA strand elongation	3	1	0.05	1
GO:0006508	proteolysis	159	5	2.79	1
GO:0045765	regulation of angiogenesis	22	1	0.39	1
GO:0061982	meiosis I cell cycle process	15	1	0.26	1
GO:0051246	regulation of protein metabolic process	167	4	2.93	1
GO:0045766	positive regulation of angiogenesis	17	1	0.3	1
GO:0044106	cellular amine metabolic process	16	1	0.28	1
GO:0051248	negative regulation of protein metabolic...	56	2	0.98	1
GO:0032268	regulation of cellular protein metabolic...	154	3	2.7	1
GO:0051304	chromosome separation	8	1	0.14	1
GO:0035295	tube development	117	2	2.05	1
GO:0032269	negative regulation of cellular protein ...	47	2	0.82	1
GO:0051307	meiotic chromosome separation	1	1	0.02	1
GO:0034660	ncRNA metabolic process	61	3	1.07	1
GO:0044085	cellular component biogenesis	300	4	5.27	1
GO:0044087	regulation of cellular component biogene...	68	2	1.19	1
GO:0071310	cellular response to organic substance	154	1	2.7	1
GO:0044089	positive regulation of cellular componen...	31	2	0.54	1
GO:0050896	response to stimulus	728	9	12.78	1
GO:0043603	cellular amide metabolic process	122	3	2.14	1
GO:0051234	establishment of localization	434	1	7.62	1
GO:0043604	amide biosynthetic process	82	3	1.44	1
GO:0051235	maintenance of location	35	1	0.61	1
GO:0099173	postsynapse organization	19	1	0.33	1
GO:0034728	nucleosome organization	13	2	0.23	1
GO:0051239	regulation of multicellular organismal p...	267	2	4.69	1
GO:0090296	regulation of mitochondrial DNA replicat...	1	1	0.02	1
GO:0098542	defense response to other organism	82	1	1.44	1
GO:0043933	protein-containing complex organization	136	2	2.39	1
GO:0006760	folic acid-containing compound metabolic...	2	1	0.04	1
GO:0034654	nucleobase-containing compound biosynthe...	594	10	10.43	1
GO:0048285	organelle fission	46	1	0.81	1
GO:0060218	hematopoietic stem cell differentiation	3	1	0.05	1
GO:0045785	positive regulation of cell adhesion	29	1	0.51	1
GO:0019538	protein metabolic process	530	11	9.3	1
GO:0043170	macromolecule metabolic process	1320	27	23.17	1
GO:0009451	RNA modification	21	2	0.37	1
GO:0000731	DNA synthesis involved in DNA repair	3	1	0.05	1
GO:1905521	regulation of macrophage migration	4	1	0.07	1
GO:1905523	positive regulation of macrophage migrat...	3	1	0.05	1
GO:0006694	steroid biosynthetic process	18	1	0.32	1
GO:0042401	cellular biogenic amine biosynthetic pro...	6	1	0.11	1
GO:0006753	nucleoside phosphate metabolic process	71	2	1.25	1
GO:0035039	male pronucleus assembly	1	1	0.02	1
GO:0023052	signaling	488	2	8.57	1
GO:0006412	translation	67	3	1.18	1
GO:0031100	animal organ regeneration	9	1	0.16	1
GO:2001141	regulation of RNA biosynthetic process	523	6	9.18	1
GO:1901342	regulation of vasculature development	23	1	0.4	1
GO:0070646	protein modification by small protein re...	16	1	0.28	1
GO:0070647	protein modification by small protein co...	103	1	1.81	1
GO:0016477	cell migration	91	2	1.6	1
GO:0048565	digestive tract development	15	1	0.26	1
GO:0060575	intestinal epithelial cell differentiati...	1	1	0.02	1
GO:0060576	intestinal epithelial cell development	1	1	0.02	1
GO:1905517	macrophage migration	4	1	0.07	1
GO:0018130	heterocycle biosynthetic process	606	10	10.64	1
GO:0051205	protein insertion into membrane	9	1	0.16	1
GO:0043113	receptor clustering	3	1	0.05	1
GO:0007160	cell-matrix adhesion	9	1	0.16	1
GO:0022603	regulation of anatomical structure morph...	70	1	1.23	1
GO:1903670	regulation of sprouting angiogenesis	3	1	0.05	1
GO:0007165	signal transduction	445	2	7.81	1
GO:0022607	cellular component assembly	258	4	4.53	1
GO:1901564	organonitrogen compound metabolic proces...	672	12	11.79	1
GO:0050900	leukocyte migration	26	1	0.46	1
GO:0090329	regulation of DNA-templated DNA replicat...	1	1	0.02	1
GO:1901565	organonitrogen compound catabolic proces...	161	5	2.83	1
GO:0070925	organelle assembly	115	1	2.02	1
GO:1901566	organonitrogen compound biosynthetic pro...	232	6	4.07	1
GO:0008104	protein localization	229	2	4.02	1
GO:0048583	regulation of response to stimulus	338	1	5.93	1
GO:0048584	positive regulation of response to stimu...	160	1	2.81	1
GO:0010629	negative regulation of gene expression	83	3	1.46	1
GO:0034613	cellular protein localization	158	2	2.77	1
GO:0007154	cell communication	493	2	8.65	1
GO:0045740	positive regulation of DNA replication	3	1	0.05	1
GO:0044260	cellular macromolecule metabolic process	728	22	12.78	1
GO:0001568	blood vessel development	82	1	1.44	1
GO:0007155	cell adhesion	169	2	2.97	1
GO:0060491	regulation of cell projection assembly	13	2	0.23	1
GO:0048246	macrophage chemotaxis	1	1	0.02	1
GO:0044262	cellular carbohydrate metabolic process	27	1	0.47	1
GO:0042981	regulation of apoptotic process	115	1	2.02	1
GO:0006725	cellular aromatic compound metabolic pro...	958	20	16.81	1
GO:0044265	cellular macromolecule catabolic process	126	5	2.21	1
GO:0044267	cellular protein metabolic process	478	11	8.39	1
GO:1904904	regulation of endothelial cell-matrix ad...	2	1	0.04	1
GO:0009755	hormone-mediated signaling pathway	22	1	0.39	1
GO:0034641	cellular nitrogen compound metabolic pro...	1030	21	18.08	1
GO:0006996	organelle organization	357	8	6.27	1
GO:0048232	male gamete generation	83	2	1.46	1
GO:0009416	response to light stimulus	18	1	0.32	1
GO:0006997	nucleus organization	9	2	0.16	1
GO:0034645	cellular macromolecule biosynthetic proc...	154	5	2.7	1
GO:0007186	G protein-coupled receptor signaling pat...	49	1	0.86	1
GO:0000011	vacuole inheritance	1	0	0.02	1
GO:0000012	single strand break repair	1	0	0.02	1
GO:0000018	regulation of DNA recombination	12	0	0.21	1
GO:0000019	regulation of mitotic recombination	1	0	0.02	1
GO:0000027	ribosomal large subunit assembly	2	0	0.04	1
GO:0000032	cell wall mannoprotein biosynthetic proc...	3	0	0.05	1
GO:0000038	very long-chain fatty acid metabolic pro...	5	0	0.09	1
GO:0000041	transition metal ion transport	14	0	0.25	1
GO:0000045	autophagosome assembly	7	0	0.12	1
GO:0000050	urea cycle	1	0	0.02	1
GO:0000054	ribosomal subunit export from nucleus	1	0	0.02	1
GO:0000070	mitotic sister chromatid segregation	18	0	0.32	1
GO:0000075	cell cycle checkpoint signaling	13	0	0.23	1
GO:0000076	DNA replication checkpoint signaling	1	0	0.02	1
GO:0000077	DNA damage checkpoint signaling	8	0	0.14	1
GO:0000079	regulation of cyclin-dependent protein s...	2	0	0.04	1
GO:0000082	G1/S transition of mitotic cell cycle	18	0	0.32	1
GO:0000086	G2/M transition of mitotic cell cycle	10	0	0.18	1
GO:0000096	sulfur amino acid metabolic process	8	0	0.14	1
GO:0000097	sulfur amino acid biosynthetic process	6	0	0.11	1
GO:0000098	sulfur amino acid catabolic process	3	0	0.05	1
GO:0000101	sulfur amino acid transport	4	0	0.07	1
GO:0000122	negative regulation of transcription by ...	125	0	2.19	1
GO:0000132	establishment of mitotic spindle orienta...	5	0	0.09	1
GO:0000154	rRNA modification	5	0	0.09	1
GO:0000160	phosphorelay signal transduction system	2	0	0.04	1
GO:0000165	MAPK cascade	47	0	0.82	1
GO:0000183	rDNA heterochromatin assembly	2	0	0.04	1
GO:0000184	nuclear-transcribed mRNA catabolic proce...	2	0	0.04	1
GO:0000209	protein polyubiquitination	34	0	0.6	1
GO:0000212	meiotic spindle organization	1	0	0.02	1
GO:0000245	spliceosomal complex assembly	3	0	0.05	1
GO:0000255	allantoin metabolic process	2	0	0.04	1
GO:0000256	allantoin catabolic process	2	0	0.04	1
GO:0000266	mitochondrial fission	1	0	0.02	1
GO:0000270	peptidoglycan metabolic process	2	0	0.04	1
GO:0000271	polysaccharide biosynthetic process	5	0	0.09	1
GO:0000272	polysaccharide catabolic process	8	0	0.14	1
GO:0000281	mitotic cytokinesis	15	0	0.26	1
GO:0000288	nuclear-transcribed mRNA catabolic proce...	8	0	0.14	1
GO:0000289	nuclear-transcribed mRNA poly(A) tail sh...	2	0	0.04	1
GO:0000291	nuclear-transcribed mRNA catabolic proce...	7	0	0.12	1
GO:0000303	response to superoxide	1	0	0.02	1
GO:0000305	response to oxygen radical	1	0	0.02	1
GO:0000338	protein deneddylation	1	0	0.02	1
GO:0000375	RNA splicing, via transesterification re...	33	0	0.58	1
GO:0000377	RNA splicing, via transesterification re...	33	0	0.58	1
GO:0000378	RNA exon ligation	1	0	0.02	1
GO:0000380	alternative mRNA splicing, via spliceoso...	9	0	0.16	1
GO:0000381	regulation of alternative mRNA splicing,...	8	0	0.14	1
GO:0000387	spliceosomal snRNP assembly	2	0	0.04	1
GO:0000394	RNA splicing, via endonucleolytic cleava...	1	0	0.02	1
GO:0000398	mRNA splicing, via spliceosome	33	0	0.58	1
GO:0000413	protein peptidyl-prolyl isomerization	3	0	0.05	1
GO:0000422	autophagy of mitochondrion	7	0	0.12	1
GO:0000423	mitophagy	1	0	0.02	1
GO:0000455	enzyme-directed rRNA pseudouridine synth...	2	0	0.04	1
GO:0000459	exonucleolytic trimming involved in rRNA...	3	0	0.05	1
GO:0000460	maturation of 5.8S rRNA	6	0	0.11	1
GO:0000462	maturation of SSU-rRNA from tricistronic...	1	0	0.02	1
GO:0000463	maturation of LSU-rRNA from tricistronic...	1	0	0.02	1
GO:0000466	maturation of 5.8S rRNA from tricistroni...	4	0	0.07	1
GO:0000467	exonucleolytic trimming to generate matu...	3	0	0.05	1
GO:0000469	cleavage involved in rRNA processing	3	0	0.05	1
GO:0000470	maturation of LSU-rRNA	3	0	0.05	1
GO:0000578	embryonic axis specification	4	0	0.07	1
GO:0000715	nucleotide-excision repair, DNA damage r...	1	0	0.02	1
GO:0000717	nucleotide-excision repair, DNA duplex u...	1	0	0.02	1
GO:0000722	telomere maintenance via recombination	1	0	0.02	1
GO:0000723	telomere maintenance	11	0	0.19	1
GO:0000724	double-strand break repair via homologou...	15	0	0.26	1
GO:0000725	recombinational repair	15	0	0.26	1
GO:0000730	DNA recombinase assembly	1	0	0.02	1
GO:0000737	DNA catabolic process, endonucleolytic	1	0	0.02	1
GO:0000768	syncytium formation by plasma membrane f...	4	0	0.07	1
GO:0000820	regulation of glutamine family amino aci...	1	0	0.02	1
GO:0000902	cell morphogenesis	98	0	1.72	1
GO:0000904	cell morphogenesis involved in different...	76	0	1.33	1
GO:0000910	cytokinesis	26	0	0.46	1
GO:0000956	nuclear-transcribed mRNA catabolic proce...	12	0	0.21	1
GO:0000957	mitochondrial RNA catabolic process	1	0	0.02	1
GO:0000958	mitochondrial mRNA catabolic process	1	0	0.02	1
GO:0000959	mitochondrial RNA metabolic process	7	0	0.12	1
GO:0000960	regulation of mitochondrial RNA cataboli...	1	0	0.02	1
GO:0000962	positive regulation of mitochondrial RNA...	1	0	0.02	1
GO:0000963	mitochondrial RNA processing	3	0	0.05	1
GO:0000964	mitochondrial RNA 5'-end processing	1	0	0.02	1
GO:0000965	mitochondrial RNA 3'-end processing	2	0	0.04	1
GO:0000966	RNA 5'-end processing	3	0	0.05	1
GO:0000968	tRNA exon ligation	1	0	0.02	1
GO:0000971	tRNA exon ligation utilizing 2',3' cycli...	1	0	0.02	1
GO:0000972	transcription-dependent tethering of RNA...	2	0	0.04	1
GO:0001101	response to acid chemical	12	0	0.21	1
GO:0001171	reverse transcription	2	0	0.04	1
GO:0001408	guanine nucleotide transport	2	0	0.04	1
GO:0001502	cartilage condensation	2	0	0.04	1
GO:0001503	ossification	20	0	0.35	1
GO:0001504	neurotransmitter uptake	4	0	0.07	1
GO:0001505	regulation of neurotransmitter levels	22	0	0.39	1
GO:0001507	acetylcholine catabolic process in synap...	1	0	0.02	1
GO:0001508	action potential	23	0	0.4	1
GO:0001510	RNA methylation	9	0	0.16	1
GO:0001516	prostaglandin biosynthetic process	2	0	0.04	1
GO:0001523	retinoid metabolic process	13	0	0.23	1
GO:0001539	cilium or flagellum-dependent cell motil...	18	0	0.32	1
GO:0001541	ovarian follicle development	6	0	0.11	1
GO:0001542	ovulation from ovarian follicle	1	0	0.02	1
GO:0001547	antral ovarian follicle growth	1	0	0.02	1
GO:0001550	ovarian cumulus expansion	1	0	0.02	1
GO:0001552	ovarian follicle atresia	1	0	0.02	1
GO:0001554	luteolysis	1	0	0.02	1
GO:0001556	oocyte maturation	3	0	0.05	1
GO:0001558	regulation of cell growth	32	0	0.56	1
GO:0001561	fatty acid alpha-oxidation	2	0	0.04	1
GO:0001569	branching involved in blood vessel morph...	2	0	0.04	1
GO:0001570	vasculogenesis	7	0	0.12	1
GO:0001573	ganglioside metabolic process	4	0	0.07	1
GO:0001574	ganglioside biosynthetic process	1	0	0.02	1
GO:0001578	microtubule bundle formation	18	0	0.32	1
GO:0001649	osteoblast differentiation	9	0	0.16	1
GO:0001654	eye development	40	0	0.7	1
GO:0001655	urogenital system development	36	0	0.63	1
GO:0001656	metanephros development	5	0	0.09	1
GO:0001657	ureteric bud development	3	0	0.05	1
GO:0001658	branching involved in ureteric bud morph...	3	0	0.05	1
GO:0001659	temperature homeostasis	12	0	0.21	1
GO:0001661	conditioned taste aversion	1	0	0.02	1
GO:0001662	behavioral fear response	1	0	0.02	1
GO:0001666	response to hypoxia	30	0	0.53	1
GO:0001675	acrosome assembly	1	0	0.02	1
GO:0001676	long-chain fatty acid metabolic process	7	0	0.12	1
GO:0001678	cellular glucose homeostasis	6	0	0.11	1
GO:0001680	tRNA 3'-terminal CCA addition	1	0	0.02	1
GO:0001682	tRNA 5'-leader removal	2	0	0.04	1
GO:0001696	gastric acid secretion	1	0	0.02	1
GO:0001697	histamine-induced gastric acid secretion	1	0	0.02	1
GO:0001698	gastrin-induced gastric acid secretion	1	0	0.02	1
GO:0001700	embryonic development via the syncytial ...	2	0	0.04	1
GO:0001701	in utero embryonic development	53	0	0.93	1
GO:0001704	formation of primary germ layer	13	0	0.23	1
GO:0001706	endoderm formation	7	0	0.12	1
GO:0001707	mesoderm formation	5	0	0.09	1
GO:0001708	cell fate specification	11	0	0.19	1
GO:0001709	cell fate determination	10	0	0.18	1
GO:0001710	mesodermal cell fate commitment	2	0	0.04	1
GO:0001711	endodermal cell fate commitment	2	0	0.04	1
GO:0001714	endodermal cell fate specification	1	0	0.02	1
GO:0001731	formation of translation preinitiation c...	1	0	0.02	1
GO:0001732	formation of cytoplasmic translation ini...	4	0	0.07	1
GO:0001736	establishment of planar polarity	4	0	0.07	1
GO:0001738	morphogenesis of a polarized epithelium	4	0	0.07	1
GO:0001745	compound eye morphogenesis	4	0	0.07	1
GO:0001751	compound eye photoreceptor cell differen...	4	0	0.07	1
GO:0001752	compound eye photoreceptor fate commitme...	1	0	0.02	1
GO:0001754	eye photoreceptor cell differentiation	9	0	0.16	1
GO:0001755	neural crest cell migration	3	0	0.05	1
GO:0001756	somitogenesis	14	0	0.25	1
GO:0001759	organ induction	1	0	0.02	1
GO:0001763	morphogenesis of a branching structure	10	0	0.18	1
GO:0001764	neuron migration	10	0	0.18	1
GO:0001765	membrane raft assembly	1	0	0.02	1
GO:0001771	immunological synapse formation	1	0	0.02	1
GO:0001773	myeloid dendritic cell activation	5	0	0.09	1
GO:0001774	microglial cell activation	7	0	0.12	1
GO:0001775	cell activation	96	0	1.68	1
GO:0001776	leukocyte homeostasis	2	0	0.04	1
GO:0001778	plasma membrane repair	1	0	0.02	1
GO:0001780	neutrophil homeostasis	2	0	0.04	1
GO:0001781	neutrophil apoptotic process	1	0	0.02	1
GO:0001783	B cell apoptotic process	1	0	0.02	1
GO:0001816	cytokine production	57	0	1	1
GO:0001817	regulation of cytokine production	57	0	1	1
GO:0001818	negative regulation of cytokine producti...	17	0	0.3	1
GO:0001819	positive regulation of cytokine producti...	31	0	0.54	1
GO:0001821	histamine secretion	1	0	0.02	1
GO:0001822	kidney development	30	0	0.53	1
GO:0001823	mesonephros development	3	0	0.05	1
GO:0001824	blastocyst development	7	0	0.12	1
GO:0001825	blastocyst formation	2	0	0.04	1
GO:0001832	blastocyst growth	1	0	0.02	1
GO:0001833	inner cell mass cell proliferation	1	0	0.02	1
GO:0001835	blastocyst hatching	1	0	0.02	1
GO:0001836	release of cytochrome c from mitochondri...	1	0	0.02	1
GO:0001837	epithelial to mesenchymal transition	11	0	0.19	1
GO:0001838	embryonic epithelial tube formation	12	0	0.21	1
GO:0001841	neural tube formation	11	0	0.19	1
GO:0001843	neural tube closure	10	0	0.18	1
GO:0001845	phagolysosome assembly	1	0	0.02	1
GO:0001865	NK T cell differentiation	1	0	0.02	1
GO:0001867	complement activation, lectin pathway	16	0	0.28	1
GO:0001881	receptor recycling	3	0	0.05	1
GO:0001885	endothelial cell development	9	0	0.16	1
GO:0001890	placenta development	29	0	0.51	1
GO:0001892	embryonic placenta development	21	0	0.37	1
GO:0001893	maternal placenta development	2	0	0.04	1
GO:0001894	tissue homeostasis	12	0	0.21	1
GO:0001895	retina homeostasis	3	0	0.05	1
GO:0001906	cell killing	3	0	0.05	1
GO:0001909	leukocyte mediated cytotoxicity	3	0	0.05	1
GO:0001910	regulation of leukocyte mediated cytotox...	1	0	0.02	1
GO:0001912	positive regulation of leukocyte mediate...	1	0	0.02	1
GO:0001913	T cell mediated cytotoxicity	2	0	0.04	1
GO:0001914	regulation of T cell mediated cytotoxici...	1	0	0.02	1
GO:0001916	positive regulation of T cell mediated c...	1	0	0.02	1
GO:0001919	regulation of receptor recycling	3	0	0.05	1
GO:0001932	regulation of protein phosphorylation	69	0	1.21	1
GO:0001933	negative regulation of protein phosphory...	18	0	0.32	1
GO:0001934	positive regulation of protein phosphory...	47	0	0.82	1
GO:0001937	negative regulation of endothelial cell ...	4	0	0.07	1
GO:0001938	positive regulation of endothelial cell ...	6	0	0.11	1
GO:0001942	hair follicle development	2	0	0.04	1
GO:0001945	lymph vessel development	3	0	0.05	1
GO:0001946	lymphangiogenesis	1	0	0.02	1
GO:0001947	heart looping	11	0	0.19	1
GO:0001955	blood vessel maturation	1	0	0.02	1
GO:0001956	positive regulation of neurotransmitter ...	2	0	0.04	1
GO:0001958	endochondral ossification	3	0	0.05	1
GO:0001959	regulation of cytokine-mediated signalin...	5	0	0.09	1
GO:0001960	negative regulation of cytokine-mediated...	3	0	0.05	1
GO:0001961	positive regulation of cytokine-mediated...	2	0	0.04	1
GO:0001963	synaptic transmission, dopaminergic	4	0	0.07	1
GO:0001964	startle response	3	0	0.05	1
GO:0001973	G protein-coupled adenosine receptor sig...	1	0	0.02	1
GO:0001974	blood vessel remodeling	2	0	0.04	1
GO:0001975	response to amphetamine	2	0	0.04	1
GO:0001976	nervous system process involved in regul...	1	0	0.02	1
GO:0001978	regulation of systemic arterial blood pr...	1	0	0.02	1
GO:0001982	baroreceptor response to decreased syste...	1	0	0.02	1
GO:0001988	positive regulation of heart rate involv...	1	0	0.02	1
GO:0002009	morphogenesis of an epithelium	45	0	0.79	1
GO:0002011	morphogenesis of an epithelial sheet	7	0	0.12	1
GO:0002021	response to dietary excess	1	0	0.02	1
GO:0002026	regulation of the force of heart contrac...	2	0	0.04	1
GO:0002027	regulation of heart rate	10	0	0.18	1
GO:0002028	regulation of sodium ion transport	13	0	0.23	1
GO:0002036	regulation of L-glutamate import across ...	1	0	0.02	1
GO:0002042	cell migration involved in sprouting ang...	4	0	0.07	1
GO:0002043	blood vessel endothelial cell proliferat...	1	0	0.02	1
GO:0002052	positive regulation of neuroblast prolif...	4	0	0.07	1
GO:0002062	chondrocyte differentiation	4	0	0.07	1
GO:0002063	chondrocyte development	2	0	0.04	1
GO:0002067	glandular epithelial cell differentiatio...	5	0	0.09	1
GO:0002068	glandular epithelial cell development	4	0	0.07	1
GO:0002076	osteoblast development	2	0	0.04	1
GO:0002084	protein depalmitoylation	2	0	0.04	1
GO:0002088	lens development in camera-type eye	7	0	0.12	1
GO:0002089	lens morphogenesis in camera-type eye	4	0	0.07	1
GO:0002090	regulation of receptor internalization	8	0	0.14	1
GO:0002091	negative regulation of receptor internal...	3	0	0.05	1
GO:0002092	positive regulation of receptor internal...	4	0	0.07	1
GO:0002093	auditory receptor cell morphogenesis	1	0	0.02	1
GO:0002100	tRNA wobble adenosine to inosine editing	1	0	0.02	1
GO:0002101	tRNA wobble cytosine modification	1	0	0.02	1
GO:0002115	store-operated calcium entry	2	0	0.04	1
GO:0002118	aggressive behavior	1	0	0.02	1
GO:0002119	nematode larval development	3	0	0.05	1
GO:0002125	maternal aggressive behavior	1	0	0.02	1
GO:0002138	retinoic acid biosynthetic process	1	0	0.02	1
GO:0002158	osteoclast proliferation	2	0	0.04	1
GO:0002164	larval development	6	0	0.11	1
GO:0002165	instar larval or pupal development	13	0	0.23	1
GO:0002175	protein localization to paranode region ...	2	0	0.04	1
GO:0002176	male germ cell proliferation	2	0	0.04	1
GO:0002181	cytoplasmic translation	10	0	0.18	1
GO:0002182	cytoplasmic translational elongation	1	0	0.02	1
GO:0002183	cytoplasmic translational initiation	5	0	0.09	1
GO:0002200	somatic diversification of immune recept...	7	0	0.12	1
GO:0002204	somatic recombination of immunoglobulin ...	5	0	0.09	1
GO:0002208	somatic diversification of immunoglobuli...	5	0	0.09	1
GO:0002209	behavioral defense response	1	0	0.02	1
GO:0002213	defense response to insect	1	0	0.02	1
GO:0002218	activation of innate immune response	12	0	0.21	1
GO:0002220	innate immune response activating cell s...	9	0	0.16	1
GO:0002221	pattern recognition receptor signaling p...	44	0	0.77	1
GO:0002224	toll-like receptor signaling pathway	31	0	0.54	1
GO:0002228	natural killer cell mediated immunity	2	0	0.04	1
GO:0002230	positive regulation of defense response ...	1	0	0.02	1
GO:0002237	response to molecule of bacterial origin	31	0	0.54	1
GO:0002250	adaptive immune response	16	0	0.28	1
GO:0002252	immune effector process	88	0	1.54	1
GO:0002253	activation of immune response	30	0	0.53	1
GO:0002262	myeloid cell homeostasis	11	0	0.19	1
GO:0002263	cell activation involved in immune respo...	58	0	1.02	1
GO:0002265	astrocyte activation involved in immune ...	1	0	0.02	1
GO:0002269	leukocyte activation involved in inflamm...	7	0	0.12	1
GO:0002270	plasmacytoid dendritic cell activation	1	0	0.02	1
GO:0002274	myeloid leukocyte activation	20	0	0.35	1
GO:0002275	myeloid cell activation involved in immu...	10	0	0.18	1
GO:0002278	eosinophil activation involved in immune...	1	0	0.02	1
GO:0002279	mast cell activation involved in immune ...	1	0	0.02	1
GO:0002281	macrophage activation involved in immune...	2	0	0.04	1
GO:0002282	microglial cell activation involved in i...	1	0	0.02	1
GO:0002283	neutrophil activation involved in immune...	10	0	0.18	1
GO:0002285	lymphocyte activation involved in immune...	50	0	0.88	1
GO:0002286	T cell activation involved in immune res...	40	0	0.7	1
GO:0002287	alpha-beta T cell activation involved in...	38	0	0.67	1
GO:0002291	T cell activation via T cell receptor co...	1	0	0.02	1
GO:0002292	T cell differentiation involved in immun...	38	0	0.67	1
GO:0002293	alpha-beta T cell differentiation involv...	38	0	0.67	1
GO:0002294	CD4-positive, alpha-beta T cell differen...	38	0	0.67	1
GO:0002312	B cell activation involved in immune res...	9	0	0.16	1
GO:0002313	mature B cell differentiation involved i...	4	0	0.07	1
GO:0002315	marginal zone B cell differentiation	4	0	0.07	1
GO:0002320	lymphoid progenitor cell differentiation	3	0	0.05	1
GO:0002323	natural killer cell activation involved ...	2	0	0.04	1
GO:0002328	pro-B cell differentiation	2	0	0.04	1
GO:0002335	mature B cell differentiation	4	0	0.07	1
GO:0002347	response to tumor cell	1	0	0.02	1
GO:0002349	histamine production involved in inflamm...	1	0	0.02	1
GO:0002366	leukocyte activation involved in immune ...	58	0	1.02	1
GO:0002367	cytokine production involved in immune r...	3	0	0.05	1
GO:0002369	T cell cytokine production	2	0	0.04	1
GO:0002377	immunoglobulin production	7	0	0.12	1
GO:0002381	immunoglobulin production involved in im...	5	0	0.09	1
GO:0002407	dendritic cell chemotaxis	1	0	0.02	1
GO:0002418	immune response to tumor cell	1	0	0.02	1
GO:0002424	T cell mediated immune response to tumor...	1	0	0.02	1
GO:0002429	immune response-activating cell surface ...	19	0	0.33	1
GO:0002431	Fc receptor mediated stimulatory signali...	3	0	0.05	1
GO:0002433	immune response-regulating cell surface ...	3	0	0.05	1
GO:0002437	inflammatory response to antigenic stimu...	49	0	0.86	1
GO:0002438	acute inflammatory response to antigenic...	1	0	0.02	1
GO:0002440	production of molecular mediator of immu...	12	0	0.21	1
GO:0002441	histamine secretion involved in inflamma...	1	0	0.02	1
GO:0002443	leukocyte mediated immunity	21	0	0.37	1
GO:0002444	myeloid leukocyte mediated immunity	11	0	0.19	1
GO:0002446	neutrophil mediated immunity	11	0	0.19	1
GO:0002447	eosinophil mediated immunity	1	0	0.02	1
GO:0002448	mast cell mediated immunity	1	0	0.02	1
GO:0002449	lymphocyte mediated immunity	11	0	0.19	1
GO:0002455	humoral immune response mediated by circ...	1	0	0.02	1
GO:0002456	T cell mediated immunity	5	0	0.09	1
GO:0002460	adaptive immune response based on somati...	11	0	0.19	1
GO:0002474	antigen processing and presentation of p...	1	0	0.02	1
GO:0002475	antigen processing and presentation via ...	1	0	0.02	1
GO:0002478	antigen processing and presentation of e...	1	0	0.02	1
GO:0002483	antigen processing and presentation of e...	1	0	0.02	1
GO:0002495	antigen processing and presentation of p...	1	0	0.02	1
GO:0002504	antigen processing and presentation of p...	1	0	0.02	1
GO:0002507	tolerance induction	1	0	0.02	1
GO:0002521	leukocyte differentiation	61	0	1.07	1
GO:0002525	acute inflammatory response to non-antig...	1	0	0.02	1
GO:0002526	acute inflammatory response	3	0	0.05	1
GO:0002532	production of molecular mediator involve...	5	0	0.09	1
GO:0002534	cytokine production involved in inflamma...	1	0	0.02	1
GO:0002536	respiratory burst involved in inflammato...	2	0	0.04	1
GO:0002548	monocyte chemotaxis	2	0	0.04	1
GO:0002553	histamine secretion by mast cell	1	0	0.02	1
GO:0002562	somatic diversification of immune recept...	7	0	0.12	1
GO:0002573	myeloid leukocyte differentiation	14	0	0.25	1
GO:0002576	platelet degranulation	3	0	0.05	1
GO:0002637	regulation of immunoglobulin production	6	0	0.11	1
GO:0002638	negative regulation of immunoglobulin pr...	2	0	0.04	1
GO:0002639	positive regulation of immunoglobulin pr...	4	0	0.07	1
GO:0002643	regulation of tolerance induction	1	0	0.02	1
GO:0002679	respiratory burst involved in defense re...	2	0	0.04	1
GO:0002683	negative regulation of immune system pro...	61	0	1.07	1
GO:0002686	negative regulation of leukocyte migrati...	1	0	0.02	1
GO:0002691	regulation of cellular extravasation	2	0	0.04	1
GO:0002692	negative regulation of cellular extravas...	1	0	0.02	1
GO:0002694	regulation of leukocyte activation	62	0	1.09	1
GO:0002695	negative regulation of leukocyte activat...	46	0	0.81	1
GO:0002696	positive regulation of leukocyte activat...	16	0	0.28	1
GO:0002697	regulation of immune effector process	55	0	0.97	1
GO:0002698	negative regulation of immune effector p...	44	0	0.77	1
GO:0002699	positive regulation of immune effector p...	10	0	0.18	1
GO:0002700	regulation of production of molecular me...	11	0	0.19	1
GO:0002701	negative regulation of production of mol...	5	0	0.09	1
GO:0002702	positive regulation of production of mol...	6	0	0.11	1
GO:0002703	regulation of leukocyte mediated immunit...	10	0	0.18	1
GO:0002704	negative regulation of leukocyte mediate...	2	0	0.04	1
GO:0002705	positive regulation of leukocyte mediate...	6	0	0.11	1
GO:0002706	regulation of lymphocyte mediated immuni...	9	0	0.16	1
GO:0002707	negative regulation of lymphocyte mediat...	2	0	0.04	1
GO:0002708	positive regulation of lymphocyte mediat...	6	0	0.11	1
GO:0002709	regulation of T cell mediated immunity	4	0	0.07	1
GO:0002711	positive regulation of T cell mediated i...	3	0	0.05	1
GO:0002712	regulation of B cell mediated immunity	5	0	0.09	1
GO:0002713	negative regulation of B cell mediated i...	2	0	0.04	1
GO:0002714	positive regulation of B cell mediated i...	3	0	0.05	1
GO:0002718	regulation of cytokine production involv...	3	0	0.05	1
GO:0002719	negative regulation of cytokine producti...	1	0	0.02	1
GO:0002720	positive regulation of cytokine producti...	2	0	0.04	1
GO:0002724	regulation of T cell cytokine production	2	0	0.04	1
GO:0002726	positive regulation of T cell cytokine p...	2	0	0.04	1
GO:0002752	cell surface pattern recognition recepto...	9	0	0.16	1
GO:0002753	cytoplasmic pattern recognition receptor...	4	0	0.07	1
GO:0002755	MyD88-dependent toll-like receptor signa...	19	0	0.33	1
GO:0002756	MyD88-independent toll-like receptor sig...	1	0	0.02	1
GO:0002757	immune response-activating signal transd...	19	0	0.33	1
GO:0002758	innate immune response-activating signal...	9	0	0.16	1
GO:0002759	regulation of antimicrobial humoral resp...	2	0	0.04	1
GO:0002761	regulation of myeloid leukocyte differen...	9	0	0.16	1
GO:0002762	negative regulation of myeloid leukocyte...	1	0	0.02	1
GO:0002763	positive regulation of myeloid leukocyte...	7	0	0.12	1
GO:0002764	immune response-regulating signaling pat...	57	0	1	1
GO:0002768	immune response-regulating cell surface ...	20	0	0.35	1
GO:0002775	antimicrobial peptide production	2	0	0.04	1
GO:0002777	antimicrobial peptide biosynthetic proce...	1	0	0.02	1
GO:0002778	antibacterial peptide production	1	0	0.02	1
GO:0002780	antibacterial peptide biosynthetic proce...	1	0	0.02	1
GO:0002781	antifungal peptide production	1	0	0.02	1
GO:0002784	regulation of antimicrobial peptide prod...	2	0	0.04	1
GO:0002785	negative regulation of antimicrobial pep...	2	0	0.04	1
GO:0002786	regulation of antibacterial peptide prod...	1	0	0.02	1
GO:0002787	negative regulation of antibacterial pep...	1	0	0.02	1
GO:0002788	regulation of antifungal peptide product...	1	0	0.02	1
GO:0002789	negative regulation of antifungal peptid...	1	0	0.02	1
GO:0002790	peptide secretion	12	0	0.21	1
GO:0002791	regulation of peptide secretion	11	0	0.19	1
GO:0002792	negative regulation of peptide secretion	1	0	0.02	1
GO:0002793	positive regulation of peptide secretion	5	0	0.09	1
GO:0002805	regulation of antimicrobial peptide bios...	1	0	0.02	1
GO:0002806	negative regulation of antimicrobial pep...	1	0	0.02	1
GO:0002808	regulation of antibacterial peptide bios...	1	0	0.02	1
GO:0002809	negative regulation of antibacterial pep...	1	0	0.02	1
GO:0002812	biosynthetic process of antibacterial pe...	1	0	0.02	1
GO:0002813	regulation of biosynthetic process of an...	1	0	0.02	1
GO:0002814	negative regulation of biosynthetic proc...	1	0	0.02	1
GO:0002819	regulation of adaptive immune response	10	0	0.18	1
GO:0002820	negative regulation of adaptive immune r...	2	0	0.04	1
GO:0002821	positive regulation of adaptive immune r...	6	0	0.11	1
GO:0002822	regulation of adaptive immune response b...	9	0	0.16	1
GO:0002823	negative regulation of adaptive immune r...	2	0	0.04	1
GO:0002824	positive regulation of adaptive immune r...	6	0	0.11	1
GO:0002828	regulation of type 2 immune response	39	0	0.68	1
GO:0002829	negative regulation of type 2 immune res...	37	0	0.65	1
GO:0002830	positive regulation of type 2 immune res...	2	0	0.04	1
GO:0002831	regulation of response to biotic stimulu...	21	0	0.37	1
GO:0002832	negative regulation of response to bioti...	7	0	0.12	1
GO:0002833	positive regulation of response to bioti...	15	0	0.26	1
GO:0002834	regulation of response to tumor cell	1	0	0.02	1
GO:0002837	regulation of immune response to tumor c...	1	0	0.02	1
GO:0002840	regulation of T cell mediated immune res...	1	0	0.02	1
GO:0002861	regulation of inflammatory response to a...	4	0	0.07	1
GO:0002862	negative regulation of inflammatory resp...	3	0	0.05	1
GO:0002863	positive regulation of inflammatory resp...	1	0	0.02	1
GO:0002886	regulation of myeloid leukocyte mediated...	1	0	0.02	1
GO:0002889	regulation of immunoglobulin mediated im...	5	0	0.09	1
GO:0002890	negative regulation of immunoglobulin me...	2	0	0.04	1
GO:0002891	positive regulation of immunoglobulin me...	3	0	0.05	1
GO:0002902	regulation of B cell apoptotic process	1	0	0.02	1
GO:0002903	negative regulation of B cell apoptotic ...	1	0	0.02	1
GO:0002920	regulation of humoral immune response	3	0	0.05	1
GO:0002921	negative regulation of humoral immune re...	2	0	0.04	1
GO:0002922	positive regulation of humoral immune re...	1	0	0.02	1
GO:0002930	trabecular meshwork development	1	0	0.02	1
GO:0002931	response to ischemia	6	0	0.11	1
GO:0002939	tRNA N1-guanine methylation	1	0	0.02	1
GO:0003002	regionalization	54	0	0.95	1
GO:0003007	heart morphogenesis	35	0	0.61	1
GO:0003008	system process	164	0	2.88	1
GO:0003009	skeletal muscle contraction	2	0	0.04	1
GO:0003012	muscle system process	37	0	0.65	1
GO:0003013	circulatory system process	50	0	0.88	1
GO:0003014	renal system process	12	0	0.21	1
GO:0003015	heart process	28	0	0.49	1
GO:0003016	respiratory system process	1	0	0.02	1
GO:0003017	lymph circulation	2	0	0.04	1
GO:0003018	vascular process in circulatory system	17	0	0.3	1
GO:0003025	regulation of systemic arterial blood pr...	1	0	0.02	1
GO:0003056	regulation of vascular associated smooth...	1	0	0.02	1
GO:0003057	regulation of the force of heart contrac...	1	0	0.02	1
GO:0003073	regulation of systemic arterial blood pr...	3	0	0.05	1
GO:0003084	positive regulation of systemic arterial...	1	0	0.02	1
GO:0003091	renal water homeostasis	2	0	0.04	1
GO:0003128	heart field specification	4	0	0.07	1
GO:0003129	heart induction	1	0	0.02	1
GO:0003130	BMP signaling pathway involved in heart ...	1	0	0.02	1
GO:0003133	endodermal-mesodermal cell signaling	1	0	0.02	1
GO:0003134	endodermal-mesodermal cell signaling inv...	1	0	0.02	1
GO:0003139	secondary heart field specification	4	0	0.07	1
GO:0003140	determination of left/right asymmetry in...	1	0	0.02	1
GO:0003143	embryonic heart tube morphogenesis	12	0	0.21	1
GO:0003144	embryonic heart tube formation	1	0	0.02	1
GO:0003148	outflow tract septum morphogenesis	6	0	0.11	1
GO:0003149	membranous septum morphogenesis	1	0	0.02	1
GO:0003151	outflow tract morphogenesis	10	0	0.18	1
GO:0003156	regulation of animal organ formation	1	0	0.02	1
GO:0003157	endocardium development	1	0	0.02	1
GO:0003158	endothelium development	13	0	0.23	1
GO:0003159	morphogenesis of an endothelium	1	0	0.02	1
GO:0003160	endocardium morphogenesis	1	0	0.02	1
GO:0003161	cardiac conduction system development	4	0	0.07	1
GO:0003162	atrioventricular node development	3	0	0.05	1
GO:0003163	sinoatrial node development	1	0	0.02	1
GO:0003169	coronary vein morphogenesis	1	0	0.02	1
GO:0003170	heart valve development	10	0	0.18	1
GO:0003171	atrioventricular valve development	3	0	0.05	1
GO:0003174	mitral valve development	1	0	0.02	1
GO:0003175	tricuspid valve development	1	0	0.02	1
GO:0003176	aortic valve development	3	0	0.05	1
GO:0003177	pulmonary valve development	7	0	0.12	1
GO:0003178	coronary sinus valve development	1	0	0.02	1
GO:0003179	heart valve morphogenesis	8	0	0.14	1
GO:0003180	aortic valve morphogenesis	3	0	0.05	1
GO:0003181	atrioventricular valve morphogenesis	2	0	0.04	1
GO:0003182	coronary sinus valve morphogenesis	1	0	0.02	1
GO:0003183	mitral valve morphogenesis	1	0	0.02	1
GO:0003184	pulmonary valve morphogenesis	7	0	0.12	1
GO:0003188	heart valve formation	3	0	0.05	1
GO:0003190	atrioventricular valve formation	2	0	0.04	1
GO:0003192	mitral valve formation	1	0	0.02	1
GO:0003193	pulmonary valve formation	1	0	0.02	1
GO:0003197	endocardial cushion development	4	0	0.07	1
GO:0003198	epithelial to mesenchymal transition inv...	2	0	0.04	1
GO:0003203	endocardial cushion morphogenesis	3	0	0.05	1
GO:0003205	cardiac chamber development	20	0	0.35	1
GO:0003206	cardiac chamber morphogenesis	15	0	0.26	1
GO:0003207	cardiac chamber formation	2	0	0.04	1
GO:0003208	cardiac ventricle morphogenesis	8	0	0.14	1
GO:0003209	cardiac atrium morphogenesis	6	0	0.11	1
GO:0003211	cardiac ventricle formation	1	0	0.02	1
GO:0003213	cardiac right atrium morphogenesis	1	0	0.02	1
GO:0003214	cardiac left ventricle morphogenesis	2	0	0.04	1
GO:0003215	cardiac right ventricle morphogenesis	2	0	0.04	1
GO:0003219	cardiac right ventricle formation	1	0	0.02	1
GO:0003222	ventricular trabecula myocardium morphog...	2	0	0.04	1
GO:0003223	ventricular compact myocardium morphogen...	4	0	0.07	1
GO:0003228	atrial cardiac muscle tissue development	1	0	0.02	1
GO:0003229	ventricular cardiac muscle tissue develo...	6	0	0.11	1
GO:0003230	cardiac atrium development	7	0	0.12	1
GO:0003231	cardiac ventricle development	13	0	0.23	1
GO:0003241	growth involved in heart morphogenesis	1	0	0.02	1
GO:0003249	cell proliferation involved in heart val...	1	0	0.02	1
GO:0003250	regulation of cell proliferation involve...	1	0	0.02	1
GO:0003252	negative regulation of cell proliferatio...	1	0	0.02	1
GO:0003253	cardiac neural crest cell migration invo...	1	0	0.02	1
GO:0003254	regulation of membrane depolarization	8	0	0.14	1
GO:0003263	cardioblast proliferation	2	0	0.04	1
GO:0003264	regulation of cardioblast proliferation	2	0	0.04	1
GO:0003266	regulation of secondary heart field card...	2	0	0.04	1
GO:0003270	Notch signaling pathway involved in regu...	1	0	0.02	1
GO:0003272	endocardial cushion formation	3	0	0.05	1
GO:0003273	cell migration involved in endocardial c...	1	0	0.02	1
GO:0003279	cardiac septum development	16	0	0.28	1
GO:0003281	ventricular septum development	9	0	0.16	1
GO:0003283	atrial septum development	6	0	0.11	1
GO:0003298	physiological muscle hypertrophy	4	0	0.07	1
GO:0003300	cardiac muscle hypertrophy	16	0	0.28	1
GO:0003301	physiological cardiac muscle hypertrophy	4	0	0.07	1
GO:0003309	type B pancreatic cell differentiation	4	0	0.07	1
GO:0003310	pancreatic A cell differentiation	2	0	0.04	1
GO:0003312	pancreatic PP cell differentiation	1	0	0.02	1
GO:0003313	heart rudiment development	1	0	0.02	1
GO:0003314	heart rudiment morphogenesis	1	0	0.02	1
GO:0003315	heart rudiment formation	1	0	0.02	1
GO:0003318	cell migration to the midline involved i...	1	0	0.02	1
GO:0003319	cardioblast migration to the midline inv...	1	0	0.02	1
GO:0003322	pancreatic A cell development	1	0	0.02	1
GO:0003323	type B pancreatic cell development	3	0	0.05	1
GO:0003326	pancreatic A cell fate commitment	1	0	0.02	1
GO:0003327	type B pancreatic cell fate commitment	1	0	0.02	1
GO:0003329	pancreatic PP cell fate commitment	1	0	0.02	1
GO:0003330	regulation of extracellular matrix const...	1	0	0.02	1
GO:0003332	negative regulation of extracellular mat...	1	0	0.02	1
GO:0003333	amino acid transmembrane transport	11	0	0.19	1
GO:0003337	mesenchymal to epithelial transition inv...	1	0	0.02	1
GO:0003338	metanephros morphogenesis	1	0	0.02	1
GO:0003341	cilium movement	22	0	0.39	1
GO:0003342	proepicardium development	1	0	0.02	1
GO:0003343	septum transversum development	1	0	0.02	1
GO:0003344	pericardium morphogenesis	2	0	0.04	1
GO:0003348	cardiac endothelial cell differentiation	1	0	0.02	1
GO:0003351	epithelial cilium movement involved in e...	1	0	0.02	1
GO:0003352	regulation of cilium movement	3	0	0.05	1
GO:0003356	regulation of cilium beat frequency	2	0	0.04	1
GO:0003382	epithelial cell morphogenesis	1	0	0.02	1
GO:0003401	axis elongation	3	0	0.05	1
GO:0003404	optic vesicle morphogenesis	1	0	0.02	1
GO:0003407	neural retina development	8	0	0.14	1
GO:0005513	detection of calcium ion	1	0	0.02	1
GO:0005976	polysaccharide metabolic process	14	0	0.25	1
GO:0005977	glycogen metabolic process	7	0	0.12	1
GO:0005978	glycogen biosynthetic process	3	0	0.05	1
GO:0005979	regulation of glycogen biosynthetic proc...	2	0	0.04	1
GO:0005980	glycogen catabolic process	3	0	0.05	1
GO:0005981	regulation of glycogen catabolic process	1	0	0.02	1
GO:0005984	disaccharide metabolic process	1	0	0.02	1
GO:0005991	trehalose metabolic process	1	0	0.02	1
GO:0005993	trehalose catabolic process	1	0	0.02	1
GO:0005996	monosaccharide metabolic process	22	0	0.39	1
GO:0006000	fructose metabolic process	1	0	0.02	1
GO:0006002	fructose 6-phosphate metabolic process	1	0	0.02	1
GO:0006003	fructose 2,6-bisphosphate metabolic proc...	1	0	0.02	1
GO:0006004	fucose metabolic process	1	0	0.02	1
GO:0006006	glucose metabolic process	11	0	0.19	1
GO:0006013	mannose metabolic process	1	0	0.02	1
GO:0006014	D-ribose metabolic process	2	0	0.04	1
GO:0006020	inositol metabolic process	3	0	0.05	1
GO:0006021	inositol biosynthetic process	1	0	0.02	1
GO:0006022	aminoglycan metabolic process	18	0	0.32	1
GO:0006023	aminoglycan biosynthetic process	12	0	0.21	1
GO:0006024	glycosaminoglycan biosynthetic process	10	0	0.18	1
GO:0006026	aminoglycan catabolic process	6	0	0.11	1
GO:0006027	glycosaminoglycan catabolic process	2	0	0.04	1
GO:0006029	proteoglycan metabolic process	8	0	0.14	1
GO:0006030	chitin metabolic process	5	0	0.09	1
GO:0006031	chitin biosynthetic process	1	0	0.02	1
GO:0006032	chitin catabolic process	4	0	0.07	1
GO:0006040	amino sugar metabolic process	7	0	0.12	1
GO:0006041	glucosamine metabolic process	1	0	0.02	1
GO:0006054	N-acetylneuraminate metabolic process	1	0	0.02	1
GO:0006056	mannoprotein metabolic process	3	0	0.05	1
GO:0006057	mannoprotein biosynthetic process	3	0	0.05	1
GO:0006059	hexitol metabolic process	1	0	0.02	1
GO:0006060	sorbitol metabolic process	1	0	0.02	1
GO:0006061	sorbitol biosynthetic process	1	0	0.02	1
GO:0006063	uronic acid metabolic process	4	0	0.07	1
GO:0006065	UDP-glucuronate biosynthetic process	1	0	0.02	1
GO:0006066	alcohol metabolic process	47	0	0.82	1
GO:0006071	glycerol metabolic process	5	0	0.09	1
GO:0006072	glycerol-3-phosphate metabolic process	2	0	0.04	1
GO:0006073	cellular glucan metabolic process	7	0	0.12	1
GO:0006081	cellular aldehyde metabolic process	9	0	0.16	1
GO:0006083	acetate metabolic process	2	0	0.04	1
GO:0006084	acetyl-CoA metabolic process	5	0	0.09	1
GO:0006085	acetyl-CoA biosynthetic process	2	0	0.04	1
GO:0006089	lactate metabolic process	1	0	0.02	1
GO:0006090	pyruvate metabolic process	14	0	0.25	1
GO:0006094	gluconeogenesis	6	0	0.11	1
GO:0006096	glycolytic process	12	0	0.21	1
GO:0006098	pentose-phosphate shunt	3	0	0.05	1
GO:0006099	tricarboxylic acid cycle	4	0	0.07	1
GO:0006101	citrate metabolic process	2	0	0.04	1
GO:0006103	2-oxoglutarate metabolic process	1	0	0.02	1
GO:0006104	succinyl-CoA metabolic process	1	0	0.02	1
GO:0006107	oxaloacetate metabolic process	1	0	0.02	1
GO:0006109	regulation of carbohydrate metabolic pro...	12	0	0.21	1
GO:0006110	regulation of glycolytic process	7	0	0.12	1
GO:0006111	regulation of gluconeogenesis	2	0	0.04	1
GO:0006112	energy reserve metabolic process	7	0	0.12	1
GO:0006116	NADH oxidation	1	0	0.02	1
GO:0006120	mitochondrial electron transport, NADH t...	2	0	0.04	1
GO:0006121	mitochondrial electron transport, succin...	1	0	0.02	1
GO:0006122	mitochondrial electron transport, ubiqui...	2	0	0.04	1
GO:0006140	regulation of nucleotide metabolic proce...	8	0	0.14	1
GO:0006144	purine nucleobase metabolic process	3	0	0.05	1
GO:0006152	purine nucleoside catabolic process	1	0	0.02	1
GO:0006154	adenosine catabolic process	1	0	0.02	1
GO:0006163	purine nucleotide metabolic process	50	0	0.88	1
GO:0006164	purine nucleotide biosynthetic process	21	0	0.37	1
GO:0006165	nucleoside diphosphate phosphorylation	14	0	0.25	1
GO:0006167	AMP biosynthetic process	1	0	0.02	1
GO:0006171	cAMP biosynthetic process	4	0	0.07	1
GO:0006172	ADP biosynthetic process	1	0	0.02	1
GO:0006177	GMP biosynthetic process	1	0	0.02	1
GO:0006182	cGMP biosynthetic process	7	0	0.12	1
GO:0006183	GTP biosynthetic process	1	0	0.02	1
GO:0006195	purine nucleotide catabolic process	2	0	0.04	1
GO:0006207	de novo' pyrimidine nucleobase biosynth...	1	0	0.02	1
GO:0006213	pyrimidine nucleoside metabolic process	2	0	0.04	1
GO:0006222	UMP biosynthetic process	3	0	0.05	1
GO:0006226	dUMP biosynthetic process	2	0	0.04	1
GO:0006228	UTP biosynthetic process	1	0	0.02	1
GO:0006241	CTP biosynthetic process	3	0	0.05	1
GO:0006244	pyrimidine nucleotide catabolic process	2	0	0.04	1
GO:0006270	DNA replication initiation	1	0	0.02	1
GO:0006278	RNA-templated DNA biosynthetic process	10	0	0.18	1
GO:0006282	regulation of DNA repair	15	0	0.26	1
GO:0006283	transcription-coupled nucleotide-excisio...	2	0	0.04	1
GO:0006284	base-excision repair	5	0	0.09	1
GO:0006285	base-excision repair, AP site formation	1	0	0.02	1
GO:0006287	base-excision repair, gap-filling	2	0	0.04	1
GO:0006290	pyrimidine dimer repair	1	0	0.02	1
GO:0006293	nucleotide-excision repair, preincision ...	1	0	0.02	1
GO:0006294	nucleotide-excision repair, preincision ...	1	0	0.02	1
GO:0006295	nucleotide-excision repair, DNA incision...	1	0	0.02	1
GO:0006296	nucleotide-excision repair, DNA incision...	1	0	0.02	1
GO:0006302	double-strand break repair	25	0	0.44	1
GO:0006303	double-strand break repair via nonhomolo...	5	0	0.09	1
GO:0006304	DNA modification	10	0	0.18	1
GO:0006305	DNA alkylation	5	0	0.09	1
GO:0006306	DNA methylation	5	0	0.09	1
GO:0006307	DNA dealkylation involved in DNA repair	1	0	0.02	1
GO:0006308	DNA catabolic process	1	0	0.02	1
GO:0006309	apoptotic DNA fragmentation	1	0	0.02	1
GO:0006312	mitotic recombination	3	0	0.05	1
GO:0006352	DNA-templated transcription, initiation	17	0	0.3	1
GO:0006353	DNA-templated transcription, termination	2	0	0.04	1
GO:0006356	regulation of transcription by RNA polym...	3	0	0.05	1
GO:0006359	regulation of transcription by RNA polym...	1	0	0.02	1
GO:0006360	transcription by RNA polymerase I	4	0	0.07	1
GO:0006361	transcription initiation from RNA polyme...	1	0	0.02	1
GO:0006363	termination of RNA polymerase I transcri...	1	0	0.02	1
GO:0006364	rRNA processing	22	0	0.39	1
GO:0006367	transcription initiation from RNA polyme...	12	0	0.21	1
GO:0006369	termination of RNA polymerase II transcr...	1	0	0.02	1
GO:0006370	7-methylguanosine mRNA capping	1	0	0.02	1
GO:0006378	mRNA polyadenylation	3	0	0.05	1
GO:0006379	mRNA cleavage	2	0	0.04	1
GO:0006382	adenosine to inosine editing	1	0	0.02	1
GO:0006383	transcription by RNA polymerase III	2	0	0.04	1
GO:0006388	tRNA splicing, via endonucleolytic cleav...	1	0	0.02	1
GO:0006390	mitochondrial transcription	3	0	0.05	1
GO:0006391	transcription initiation from mitochondr...	1	0	0.02	1
GO:0006397	mRNA processing	44	0	0.77	1
GO:0006401	RNA catabolic process	23	0	0.4	1
GO:0006402	mRNA catabolic process	20	0	0.35	1
GO:0006403	RNA localization	22	0	0.39	1
GO:0006405	RNA export from nucleus	11	0	0.19	1
GO:0006406	mRNA export from nucleus	9	0	0.16	1
GO:0006409	tRNA export from nucleus	2	0	0.04	1
GO:0006413	translational initiation	9	0	0.16	1
GO:0006414	translational elongation	5	0	0.09	1
GO:0006415	translational termination	2	0	0.04	1
GO:0006418	tRNA aminoacylation for protein translat...	5	0	0.09	1
GO:0006419	alanyl-tRNA aminoacylation	1	0	0.02	1
GO:0006420	arginyl-tRNA aminoacylation	1	0	0.02	1
GO:0006424	glutamyl-tRNA aminoacylation	1	0	0.02	1
GO:0006432	phenylalanyl-tRNA aminoacylation	1	0	0.02	1
GO:0006437	tyrosyl-tRNA aminoacylation	1	0	0.02	1
GO:0006446	regulation of translational initiation	5	0	0.09	1
GO:0006448	regulation of translational elongation	2	0	0.04	1
GO:0006449	regulation of translational termination	2	0	0.04	1
GO:0006450	regulation of translational fidelity	2	0	0.04	1
GO:0006452	translational frameshifting	1	0	0.02	1
GO:0006457	protein folding	20	0	0.35	1
GO:0006458	de novo' protein folding	3	0	0.05	1
GO:0006469	negative regulation of protein kinase ac...	9	0	0.16	1
GO:0006470	protein dephosphorylation	29	0	0.51	1
GO:0006471	protein ADP-ribosylation	6	0	0.11	1
GO:0006473	protein acetylation	21	0	0.37	1
GO:0006474	N-terminal protein amino acid acetylatio...	1	0	0.02	1
GO:0006475	internal protein amino acid acetylation	20	0	0.35	1
GO:0006476	protein deacetylation	10	0	0.18	1
GO:0006477	protein sulfation	2	0	0.04	1
GO:0006478	peptidyl-tyrosine sulfation	1	0	0.02	1
GO:0006479	protein methylation	12	0	0.21	1
GO:0006482	protein demethylation	3	0	0.05	1
GO:0006487	protein N-linked glycosylation	10	0	0.18	1
GO:0006488	dolichol-linked oligosaccharide biosynth...	3	0	0.05	1
GO:0006490	oligosaccharide-lipid intermediate biosy...	3	0	0.05	1
GO:0006491	N-glycan processing	3	0	0.05	1
GO:0006493	protein O-linked glycosylation	21	0	0.37	1
GO:0006497	protein lipidation	6	0	0.11	1
GO:0006501	C-terminal protein lipidation	1	0	0.02	1
GO:0006505	GPI anchor metabolic process	3	0	0.05	1
GO:0006506	GPI anchor biosynthetic process	3	0	0.05	1
GO:0006509	membrane protein ectodomain proteolysis	2	0	0.04	1
GO:0006513	protein monoubiquitination	9	0	0.16	1
GO:0006515	protein quality control for misfolded or...	4	0	0.07	1
GO:0006516	glycoprotein catabolic process	1	0	0.02	1
GO:0006517	protein deglycosylation	2	0	0.04	1
GO:0006521	regulation of cellular amino acid metabo...	1	0	0.02	1
GO:0006522	alanine metabolic process	1	0	0.02	1
GO:0006524	alanine catabolic process	1	0	0.02	1
GO:0006528	asparagine metabolic process	1	0	0.02	1
GO:0006531	aspartate metabolic process	1	0	0.02	1
GO:0006533	aspartate catabolic process	1	0	0.02	1
GO:0006534	cysteine metabolic process	5	0	0.09	1
GO:0006535	cysteine biosynthetic process from serin...	2	0	0.04	1
GO:0006536	glutamate metabolic process	4	0	0.07	1
GO:0006541	glutamine metabolic process	3	0	0.05	1
GO:0006542	glutamine biosynthetic process	2	0	0.04	1
GO:0006544	glycine metabolic process	2	0	0.04	1
GO:0006545	glycine biosynthetic process	1	0	0.02	1
GO:0006549	isoleucine metabolic process	1	0	0.02	1
GO:0006551	leucine metabolic process	1	0	0.02	1
GO:0006552	leucine catabolic process	1	0	0.02	1
GO:0006553	lysine metabolic process	2	0	0.04	1
GO:0006554	lysine catabolic process	1	0	0.02	1
GO:0006555	methionine metabolic process	3	0	0.05	1
GO:0006556	S-adenosylmethionine biosynthetic proces...	2	0	0.04	1
GO:0006558	L-phenylalanine metabolic process	1	0	0.02	1
GO:0006559	L-phenylalanine catabolic process	1	0	0.02	1
GO:0006560	proline metabolic process	3	0	0.05	1
GO:0006561	proline biosynthetic process	1	0	0.02	1
GO:0006562	proline catabolic process	2	0	0.04	1
GO:0006563	L-serine metabolic process	3	0	0.05	1
GO:0006565	L-serine catabolic process	1	0	0.02	1
GO:0006566	threonine metabolic process	2	0	0.04	1
GO:0006567	threonine catabolic process	2	0	0.04	1
GO:0006568	tryptophan metabolic process	2	0	0.04	1
GO:0006569	tryptophan catabolic process	2	0	0.04	1
GO:0006570	tyrosine metabolic process	2	0	0.04	1
GO:0006572	tyrosine catabolic process	1	0	0.02	1
GO:0006577	amino-acid betaine metabolic process	5	0	0.09	1
GO:0006578	amino-acid betaine biosynthetic process	3	0	0.05	1
GO:0006579	amino-acid betaine catabolic process	1	0	0.02	1
GO:0006581	acetylcholine catabolic process	2	0	0.04	1
GO:0006582	melanin metabolic process	1	0	0.02	1
GO:0006584	catecholamine metabolic process	10	0	0.18	1
GO:0006586	indolalkylamine metabolic process	2	0	0.04	1
GO:0006589	octopamine biosynthetic process	1	0	0.02	1
GO:0006590	thyroid hormone generation	2	0	0.04	1
GO:0006591	ornithine metabolic process	1	0	0.02	1
GO:0006598	polyamine catabolic process	1	0	0.02	1
GO:0006599	phosphagen metabolic process	1	0	0.02	1
GO:0006603	phosphocreatine metabolic process	1	0	0.02	1
GO:0006605	protein targeting	37	0	0.65	1
GO:0006606	protein import into nucleus	16	0	0.28	1
GO:0006612	protein targeting to membrane	14	0	0.25	1
GO:0006622	protein targeting to lysosome	3	0	0.05	1
GO:0006623	protein targeting to vacuole	8	0	0.14	1
GO:0006624	vacuolar protein processing	1	0	0.02	1
GO:0006625	protein targeting to peroxisome	2	0	0.04	1
GO:0006626	protein targeting to mitochondrion	12	0	0.21	1
GO:0006627	protein processing involved in protein t...	1	0	0.02	1
GO:0006631	fatty acid metabolic process	39	0	0.68	1
GO:0006633	fatty acid biosynthetic process	15	0	0.26	1
GO:0006635	fatty acid beta-oxidation	10	0	0.18	1
GO:0006636	unsaturated fatty acid biosynthetic proc...	6	0	0.11	1
GO:0006637	acyl-CoA metabolic process	8	0	0.14	1
GO:0006638	neutral lipid metabolic process	16	0	0.28	1
GO:0006639	acylglycerol metabolic process	16	0	0.28	1
GO:0006640	monoacylglycerol biosynthetic process	1	0	0.02	1
GO:0006641	triglyceride metabolic process	13	0	0.23	1
GO:0006643	membrane lipid metabolic process	22	0	0.39	1
GO:0006644	phospholipid metabolic process	30	0	0.53	1
GO:0006646	phosphatidylethanolamine biosynthetic pr...	1	0	0.02	1
GO:0006650	glycerophospholipid metabolic process	23	0	0.4	1
GO:0006654	phosphatidic acid biosynthetic process	1	0	0.02	1
GO:0006658	phosphatidylserine metabolic process	2	0	0.04	1
GO:0006660	phosphatidylserine catabolic process	2	0	0.04	1
GO:0006661	phosphatidylinositol biosynthetic proces...	10	0	0.18	1
GO:0006662	glycerol ether metabolic process	3	0	0.05	1
GO:0006664	glycolipid metabolic process	11	0	0.19	1
GO:0006665	sphingolipid metabolic process	17	0	0.3	1
GO:0006668	sphinganine-1-phosphate metabolic proces...	1	0	0.02	1
GO:0006670	sphingosine metabolic process	3	0	0.05	1
GO:0006672	ceramide metabolic process	11	0	0.19	1
GO:0006677	glycosylceramide metabolic process	1	0	0.02	1
GO:0006681	galactosylceramide metabolic process	1	0	0.02	1
GO:0006682	galactosylceramide biosynthetic process	1	0	0.02	1
GO:0006684	sphingomyelin metabolic process	3	0	0.05	1
GO:0006685	sphingomyelin catabolic process	1	0	0.02	1
GO:0006687	glycosphingolipid metabolic process	7	0	0.12	1
GO:0006688	glycosphingolipid biosynthetic process	2	0	0.04	1
GO:0006689	ganglioside catabolic process	1	0	0.02	1
GO:0006690	icosanoid metabolic process	10	0	0.18	1
GO:0006691	leukotriene metabolic process	3	0	0.05	1
GO:0006692	prostanoid metabolic process	5	0	0.09	1
GO:0006693	prostaglandin metabolic process	5	0	0.09	1
GO:0006695	cholesterol biosynthetic process	6	0	0.11	1
GO:0006702	androgen biosynthetic process	1	0	0.02	1
GO:0006704	glucocorticoid biosynthetic process	4	0	0.07	1
GO:0006706	steroid catabolic process	7	0	0.12	1
GO:0006707	cholesterol catabolic process	1	0	0.02	1
GO:0006711	estrogen catabolic process	2	0	0.04	1
GO:0006720	isoprenoid metabolic process	17	0	0.3	1
GO:0006721	terpenoid metabolic process	15	0	0.26	1
GO:0006722	triterpenoid metabolic process	1	0	0.02	1
GO:0006726	eye pigment biosynthetic process	1	0	0.02	1
GO:0006727	ommochrome biosynthetic process	1	0	0.02	1
GO:0006729	tetrahydrobiopterin biosynthetic process	1	0	0.02	1
GO:0006734	NADH metabolic process	1	0	0.02	1
GO:0006739	NADP metabolic process	7	0	0.12	1
GO:0006740	NADPH regeneration	3	0	0.05	1
GO:0006741	NADP biosynthetic process	2	0	0.04	1
GO:0006743	ubiquinone metabolic process	3	0	0.05	1
GO:0006744	ubiquinone biosynthetic process	3	0	0.05	1
GO:0006749	glutathione metabolic process	9	0	0.16	1
GO:0006750	glutathione biosynthetic process	1	0	0.02	1
GO:0006751	glutathione catabolic process	2	0	0.04	1
GO:0006754	ATP biosynthetic process	2	0	0.04	1
GO:0006757	ATP generation from ADP	12	0	0.21	1
GO:0006766	vitamin metabolic process	13	0	0.23	1
GO:0006767	water-soluble vitamin metabolic process	8	0	0.14	1
GO:0006768	biotin metabolic process	2	0	0.04	1
GO:0006775	fat-soluble vitamin metabolic process	3	0	0.05	1
GO:0006778	porphyrin-containing compound metabolic ...	8	0	0.14	1
GO:0006779	porphyrin-containing compound biosynthet...	5	0	0.09	1
GO:0006782	protoporphyrinogen IX biosynthetic proce...	1	0	0.02	1
GO:0006783	heme biosynthetic process	4	0	0.07	1
GO:0006784	heme A biosynthetic process	1	0	0.02	1
GO:0006787	porphyrin-containing compound catabolic ...	1	0	0.02	1
GO:0006789	bilirubin conjugation	1	0	0.02	1
GO:0006790	sulfur compound metabolic process	42	0	0.74	1
GO:0006801	superoxide metabolic process	4	0	0.07	1
GO:0006805	xenobiotic metabolic process	9	0	0.16	1
GO:0006809	nitric oxide biosynthetic process	9	0	0.16	1
GO:0006810	transport	420	0	7.37	1
GO:0006811	ion transport	156	0	2.74	1
GO:0006812	cation transport	109	0	1.91	1
GO:0006813	potassium ion transport	31	0	0.54	1
GO:0006814	sodium ion transport	36	0	0.63	1
GO:0006816	calcium ion transport	27	0	0.47	1
GO:0006820	anion transport	54	0	0.95	1
GO:0006821	chloride transport	11	0	0.19	1
GO:0006825	copper ion transport	1	0	0.02	1
GO:0006826	iron ion transport	6	0	0.11	1
GO:0006828	manganese ion transport	2	0	0.04	1
GO:0006829	zinc ion transport	7	0	0.12	1
GO:0006833	water transport	1	0	0.02	1
GO:0006835	dicarboxylic acid transport	14	0	0.25	1
GO:0006836	neurotransmitter transport	23	0	0.4	1
GO:0006839	mitochondrial transport	14	0	0.25	1
GO:0006842	tricarboxylic acid transport	1	0	0.02	1
GO:0006843	mitochondrial citrate transmembrane tran...	1	0	0.02	1
GO:0006844	acyl carnitine transport	2	0	0.04	1
GO:0006851	mitochondrial calcium ion transmembrane ...	4	0	0.07	1
GO:0006855	xenobiotic transmembrane transport	2	0	0.04	1
GO:0006857	oligopeptide transport	3	0	0.05	1
GO:0006858	extracellular transport	1	0	0.02	1
GO:0006862	nucleotide transport	6	0	0.11	1
GO:0006864	pyrimidine nucleotide transport	1	0	0.02	1
GO:0006865	amino acid transport	21	0	0.37	1
GO:0006869	lipid transport	24	0	0.42	1
GO:0006873	cellular ion homeostasis	48	0	0.84	1
GO:0006874	cellular calcium ion homeostasis	30	0	0.53	1
GO:0006875	cellular metal ion homeostasis	41	0	0.72	1
GO:0006878	cellular copper ion homeostasis	2	0	0.04	1
GO:0006879	cellular iron ion homeostasis	4	0	0.07	1
GO:0006882	cellular zinc ion homeostasis	4	0	0.07	1
GO:0006883	cellular sodium ion homeostasis	2	0	0.04	1
GO:0006885	regulation of pH	9	0	0.16	1
GO:0006886	intracellular protein transport	83	0	1.46	1
GO:0006887	exocytosis	35	0	0.61	1
GO:0006888	endoplasmic reticulum to Golgi vesicle-m...	28	0	0.49	1
GO:0006890	retrograde vesicle-mediated transport, G...	10	0	0.18	1
GO:0006891	intra-Golgi vesicle-mediated transport	4	0	0.07	1
GO:0006892	post-Golgi vesicle-mediated transport	23	0	0.4	1
GO:0006893	Golgi to plasma membrane transport	11	0	0.19	1
GO:0006895	Golgi to endosome transport	5	0	0.09	1
GO:0006896	Golgi to vacuole transport	5	0	0.09	1
GO:0006897	endocytosis	60	0	1.05	1
GO:0006898	receptor-mediated endocytosis	23	0	0.4	1
GO:0006900	vesicle budding from membrane	5	0	0.09	1
GO:0006901	vesicle coating	2	0	0.04	1
GO:0006903	vesicle targeting	4	0	0.07	1
GO:0006904	vesicle docking involved in exocytosis	3	0	0.05	1
GO:0006906	vesicle fusion	9	0	0.16	1
GO:0006907	pinocytosis	2	0	0.04	1
GO:0006909	phagocytosis	20	0	0.35	1
GO:0006910	phagocytosis, recognition	9	0	0.16	1
GO:0006911	phagocytosis, engulfment	5	0	0.09	1
GO:0006913	nucleocytoplasmic transport	30	0	0.53	1
GO:0006914	autophagy	26	0	0.46	1
GO:0006919	activation of cysteine-type endopeptidas...	3	0	0.05	1
GO:0006925	inflammatory cell apoptotic process	1	0	0.02	1
GO:0006929	substrate-dependent cell migration	2	0	0.04	1
GO:0006931	substrate-dependent cell migration, cell...	1	0	0.02	1
GO:0006936	muscle contraction	30	0	0.53	1
GO:0006937	regulation of muscle contraction	15	0	0.26	1
GO:0006939	smooth muscle contraction	4	0	0.07	1
GO:0006940	regulation of smooth muscle contraction	3	0	0.05	1
GO:0006941	striated muscle contraction	22	0	0.39	1
GO:0006942	regulation of striated muscle contractio...	12	0	0.21	1
GO:0006949	syncytium formation	4	0	0.07	1
GO:0006953	acute-phase response	1	0	0.02	1
GO:0006954	inflammatory response	88	0	1.54	1
GO:0006956	complement activation	17	0	0.3	1
GO:0006959	humoral immune response	27	0	0.47	1
GO:0006968	cellular defense response	1	0	0.02	1
GO:0006970	response to osmotic stress	5	0	0.09	1
GO:0006972	hyperosmotic response	1	0	0.02	1
GO:0006977	DNA damage response, signal transduction...	1	0	0.02	1
GO:0006983	ER overload response	1	0	0.02	1
GO:0006984	ER-nucleus signaling pathway	5	0	0.09	1
GO:0006986	response to unfolded protein	10	0	0.18	1
GO:0006991	response to sterol depletion	3	0	0.05	1
GO:0006995	cellular response to nitrogen starvation	2	0	0.04	1
GO:0006998	nuclear envelope organization	1	0	0.02	1
GO:0007000	nucleolus organization	3	0	0.05	1
GO:0007004	telomere maintenance via telomerase	8	0	0.14	1
GO:0007006	mitochondrial membrane organization	6	0	0.11	1
GO:0007007	inner mitochondrial membrane organizatio...	4	0	0.07	1
GO:0007009	plasma membrane organization	20	0	0.35	1
GO:0007015	actin filament organization	35	0	0.61	1
GO:0007018	microtubule-based movement	49	0	0.86	1
GO:0007019	microtubule depolymerization	5	0	0.09	1
GO:0007020	microtubule nucleation	1	0	0.02	1
GO:0007026	negative regulation of microtubule depol...	4	0	0.07	1
GO:0007028	cytoplasm organization	2	0	0.04	1
GO:0007030	Golgi organization	17	0	0.3	1
GO:0007031	peroxisome organization	3	0	0.05	1
GO:0007032	endosome organization	5	0	0.09	1
GO:0007033	vacuole organization	14	0	0.25	1
GO:0007034	vacuolar transport	17	0	0.3	1
GO:0007035	vacuolar acidification	1	0	0.02	1
GO:0007039	protein catabolic process in the vacuole	3	0	0.05	1
GO:0007040	lysosome organization	6	0	0.11	1
GO:0007041	lysosomal transport	11	0	0.19	1
GO:0007042	lysosomal lumen acidification	1	0	0.02	1
GO:0007043	cell-cell junction assembly	9	0	0.16	1
GO:0007044	cell-substrate junction assembly	3	0	0.05	1
GO:0007056	spindle assembly involved in female meio...	1	0	0.02	1
GO:0007057	spindle assembly involved in female meio...	1	0	0.02	1
GO:0007062	sister chromatid cohesion	9	0	0.16	1
GO:0007063	regulation of sister chromatid cohesion	4	0	0.07	1
GO:0007064	mitotic sister chromatid cohesion	4	0	0.07	1
GO:0007076	mitotic chromosome condensation	4	0	0.07	1
GO:0007079	mitotic chromosome movement towards spin...	1	0	0.02	1
GO:0007080	mitotic metaphase plate congression	7	0	0.12	1
GO:0007088	regulation of mitotic nuclear division	14	0	0.25	1
GO:0007091	metaphase/anaphase transition of mitotic...	6	0	0.11	1
GO:0007093	mitotic cell cycle checkpoint signaling	10	0	0.18	1
GO:0007094	mitotic spindle assembly checkpoint sign...	4	0	0.07	1
GO:0007095	mitotic G2 DNA damage checkpoint signali...	3	0	0.05	1
GO:0007096	regulation of exit from mitosis	5	0	0.09	1
GO:0007097	nuclear migration	6	0	0.11	1
GO:0007098	centrosome cycle	13	0	0.23	1
GO:0007099	centriole replication	4	0	0.07	1
GO:0007100	mitotic centrosome separation	3	0	0.05	1
GO:0007111	meiosis II cytokinesis	2	0	0.04	1
GO:0007113	endomitotic cell cycle	1	0	0.02	1
GO:0007129	homologous chromosome pairing at meiosis	5	0	0.09	1
GO:0007130	synaptonemal complex assembly	2	0	0.04	1
GO:0007135	meiosis II	1	0	0.02	1
GO:0007140	male meiotic nuclear division	5	0	0.09	1
GO:0007141	male meiosis I	3	0	0.05	1
GO:0007143	female meiotic nuclear division	3	0	0.05	1
GO:0007144	female meiosis I	2	0	0.04	1
GO:0007156	homophilic cell adhesion via plasma memb...	6	0	0.11	1
GO:0007157	heterophilic cell-cell adhesion via plas...	4	0	0.07	1
GO:0007159	leukocyte cell-cell adhesion	53	0	0.93	1
GO:0007162	negative regulation of cell adhesion	49	0	0.86	1
GO:0007163	establishment or maintenance of cell pol...	17	0	0.3	1
GO:0007164	establishment of tissue polarity	4	0	0.07	1
GO:0007166	cell surface receptor signaling pathway	208	0	3.65	1
GO:0007167	enzyme linked receptor protein signaling...	86	0	1.51	1
GO:0007168	receptor guanylyl cyclase signaling path...	7	0	0.12	1
GO:0007169	transmembrane receptor protein tyrosine ...	53	0	0.93	1
GO:0007171	activation of transmembrane receptor pro...	3	0	0.05	1
GO:0007173	epidermal growth factor receptor signali...	9	0	0.16	1
GO:0007178	transmembrane receptor protein serine/th...	25	0	0.44	1
GO:0007179	transforming growth factor beta receptor...	11	0	0.19	1
GO:0007182	common-partner SMAD protein phosphorylat...	1	0	0.02	1
GO:0007183	SMAD protein complex assembly	2	0	0.04	1
GO:0007185	transmembrane receptor protein tyrosine ...	1	0	0.02	1
GO:0007187	G protein-coupled receptor signaling pat...	4	0	0.07	1
GO:0007188	adenylate cyclase-modulating G protein-c...	10	0	0.18	1
GO:0007189	adenylate cyclase-activating G protein-c...	6	0	0.11	1
GO:0007190	activation of adenylate cyclase activity	2	0	0.04	1
GO:0007191	adenylate cyclase-activating dopamine re...	1	0	0.02	1
GO:0007193	adenylate cyclase-inhibiting G protein-c...	5	0	0.09	1
GO:0007194	negative regulation of adenylate cyclase...	2	0	0.04	1
GO:0007195	adenylate cyclase-inhibiting dopamine re...	1	0	0.02	1
GO:0007198	adenylate cyclase-inhibiting serotonin r...	1	0	0.02	1
GO:0007200	phospholipase C-activating G protein-cou...	3	0	0.05	1
GO:0007202	activation of phospholipase C activity	2	0	0.04	1
GO:0007204	positive regulation of cytosolic calcium...	17	0	0.3	1
GO:0007210	serotonin receptor signaling pathway	1	0	0.02	1
GO:0007212	dopamine receptor signaling pathway	2	0	0.04	1
GO:0007214	gamma-aminobutyric acid signaling pathwa...	2	0	0.04	1
GO:0007215	glutamate receptor signaling pathway	2	0	0.04	1
GO:0007218	neuropeptide signaling pathway	9	0	0.16	1
GO:0007219	Notch signaling pathway	35	0	0.61	1
GO:0007220	Notch receptor processing	3	0	0.05	1
GO:0007221	positive regulation of transcription of ...	1	0	0.02	1
GO:0007223	Wnt signaling pathway, calcium modulatin...	1	0	0.02	1
GO:0007224	smoothened signaling pathway	16	0	0.28	1
GO:0007229	integrin-mediated signaling pathway	2	0	0.04	1
GO:0007249	I-kappaB kinase/NF-kappaB signaling	8	0	0.14	1
GO:0007250	activation of NF-kappaB-inducing kinase ...	1	0	0.02	1
GO:0007252	I-kappaB phosphorylation	1	0	0.02	1
GO:0007253	cytoplasmic sequestering of NF-kappaB	1	0	0.02	1
GO:0007254	JNK cascade	16	0	0.28	1
GO:0007259	receptor signaling pathway via JAK-STAT	10	0	0.18	1
GO:0007260	tyrosine phosphorylation of STAT protein	3	0	0.05	1
GO:0007263	nitric oxide mediated signal transductio...	1	0	0.02	1
GO:0007264	small GTPase mediated signal transductio...	35	0	0.61	1
GO:0007265	Ras protein signal transduction	29	0	0.51	1
GO:0007266	Rho protein signal transduction	4	0	0.07	1
GO:0007268	chemical synaptic transmission	84	0	1.47	1
GO:0007269	neurotransmitter secretion	14	0	0.25	1
GO:0007271	synaptic transmission, cholinergic	10	0	0.18	1
GO:0007272	ensheathment of neurons	11	0	0.19	1
GO:0007274	neuromuscular synaptic transmission	13	0	0.23	1
GO:0007288	sperm axoneme assembly	2	0	0.04	1
GO:0007293	germarium-derived egg chamber formation	5	0	0.09	1
GO:0007294	germarium-derived oocyte fate determinat...	1	0	0.02	1
GO:0007297	ovarian follicle cell migration	4	0	0.07	1
GO:0007298	border follicle cell migration	4	0	0.07	1
GO:0007300	ovarian nurse cell to oocyte transport	3	0	0.05	1
GO:0007301	female germline ring canal formation	3	0	0.05	1
GO:0007303	cytoplasmic transport, nurse cell to ooc...	2	0	0.04	1
GO:0007308	oocyte construction	3	0	0.05	1
GO:0007309	oocyte axis specification	2	0	0.04	1
GO:0007314	oocyte anterior/posterior axis specifica...	2	0	0.04	1
GO:0007315	pole plasm assembly	2	0	0.04	1
GO:0007316	pole plasm RNA localization	2	0	0.04	1
GO:0007317	regulation of pole plasm oskar mRNA loca...	2	0	0.04	1
GO:0007339	binding of sperm to zona pellucida	2	0	0.04	1
GO:0007340	acrosome reaction	1	0	0.02	1
GO:0007341	penetration of zona pellucida	1	0	0.02	1
GO:0007343	egg activation	2	0	0.04	1
GO:0007346	regulation of mitotic cell cycle	46	0	0.81	1
GO:0007349	cellularization	3	0	0.05	1
GO:0007350	blastoderm segmentation	6	0	0.11	1
GO:0007351	tripartite regional subdivision	4	0	0.07	1
GO:0007354	zygotic determination of anterior/poster...	1	0	0.02	1
GO:0007365	periodic partitioning	1	0	0.02	1
GO:0007367	segment polarity determination	1	0	0.02	1
GO:0007368	determination of left/right symmetry	20	0	0.35	1
GO:0007369	gastrulation	21	0	0.37	1
GO:0007386	compartment pattern specification	5	0	0.09	1
GO:0007389	pattern specification process	67	0	1.18	1
GO:0007391	dorsal closure	2	0	0.04	1
GO:0007400	neuroblast fate determination	1	0	0.02	1
GO:0007403	glial cell fate determination	1	0	0.02	1
GO:0007405	neuroblast proliferation	8	0	0.14	1
GO:0007409	axonogenesis	51	0	0.9	1
GO:0007411	axon guidance	29	0	0.51	1
GO:0007413	axonal fasciculation	2	0	0.04	1
GO:0007414	axonal defasciculation	1	0	0.02	1
GO:0007415	defasciculation of motor neuron axon	1	0	0.02	1
GO:0007418	ventral midline development	1	0	0.02	1
GO:0007419	ventral cord development	2	0	0.04	1
GO:0007422	peripheral nervous system development	8	0	0.14	1
GO:0007423	sensory organ development	54	0	0.95	1
GO:0007424	open tracheal system development	9	0	0.16	1
GO:0007426	tracheal outgrowth, open tracheal system	1	0	0.02	1
GO:0007427	epithelial cell migration, open tracheal...	1	0	0.02	1
GO:0007431	salivary gland development	5	0	0.09	1
GO:0007432	salivary gland boundary specification	1	0	0.02	1
GO:0007435	salivary gland morphogenesis	4	0	0.07	1
GO:0007440	foregut morphogenesis	3	0	0.05	1
GO:0007442	hindgut morphogenesis	4	0	0.07	1
GO:0007443	Malpighian tubule morphogenesis	4	0	0.07	1
GO:0007444	imaginal disc development	13	0	0.23	1
GO:0007447	imaginal disc pattern formation	6	0	0.11	1
GO:0007448	anterior/posterior pattern specification...	3	0	0.05	1
GO:0007450	dorsal/ventral pattern formation, imagin...	2	0	0.04	1
GO:0007455	eye-antennal disc morphogenesis	1	0	0.02	1
GO:0007460	R8 cell fate commitment	1	0	0.02	1
GO:0007469	antennal development	3	0	0.05	1
GO:0007472	wing disc morphogenesis	7	0	0.12	1
GO:0007474	imaginal disc-derived wing vein specific...	1	0	0.02	1
GO:0007476	imaginal disc-derived wing morphogenesis	7	0	0.12	1
GO:0007478	leg disc morphogenesis	3	0	0.05	1
GO:0007480	imaginal disc-derived leg morphogenesis	3	0	0.05	1
GO:0007483	genital disc morphogenesis	1	0	0.02	1
GO:0007484	imaginal disc-derived genitalia developm...	2	0	0.04	1
GO:0007485	imaginal disc-derived male genitalia dev...	2	0	0.04	1
GO:0007488	histoblast morphogenesis	2	0	0.04	1
GO:0007492	endoderm development	13	0	0.23	1
GO:0007500	mesodermal cell fate determination	1	0	0.02	1
GO:0007501	mesodermal cell fate specification	1	0	0.02	1
GO:0007503	fat body development	1	0	0.02	1
GO:0007505	adult fat body development	1	0	0.02	1
GO:0007507	heart development	71	0	1.25	1
GO:0007509	mesoderm migration involved in gastrulat...	1	0	0.02	1
GO:0007512	adult heart development	5	0	0.09	1
GO:0007520	myoblast fusion	4	0	0.07	1
GO:0007521	muscle cell fate determination	1	0	0.02	1
GO:0007522	visceral muscle development	2	0	0.04	1
GO:0007525	somatic muscle development	3	0	0.05	1
GO:0007527	adult somatic muscle development	1	0	0.02	1
GO:0007530	sex determination	1	0	0.02	1
GO:0007548	sex differentiation	27	0	0.47	1
GO:0007552	metamorphosis	11	0	0.19	1
GO:0007560	imaginal disc morphogenesis	10	0	0.18	1
GO:0007561	imaginal disc eversion	1	0	0.02	1
GO:0007565	female pregnancy	8	0	0.14	1
GO:0007567	parturition	1	0	0.02	1
GO:0007585	respiratory gaseous exchange by respirat...	2	0	0.04	1
GO:0007586	digestion	9	0	0.16	1
GO:0007588	excretion	6	0	0.11	1
GO:0007589	body fluid secretion	5	0	0.09	1
GO:0007591	molting cycle, chitin-based cuticle	2	0	0.04	1
GO:0007595	lactation	3	0	0.05	1
GO:0007596	blood coagulation	18	0	0.32	1
GO:0007597	blood coagulation, intrinsic pathway	1	0	0.02	1
GO:0007599	hemostasis	18	0	0.32	1
GO:0007600	sensory perception	47	0	0.82	1
GO:0007601	visual perception	12	0	0.21	1
GO:0007602	phototransduction	3	0	0.05	1
GO:0007605	sensory perception of sound	19	0	0.33	1
GO:0007606	sensory perception of chemical stimulus	4	0	0.07	1
GO:0007608	sensory perception of smell	3	0	0.05	1
GO:0007610	behavior	63	0	1.11	1
GO:0007611	learning or memory	22	0	0.39	1
GO:0007612	learning	12	0	0.21	1
GO:0007613	memory	17	0	0.3	1
GO:0007614	short-term memory	3	0	0.05	1
GO:0007615	anesthesia-resistant memory	3	0	0.05	1
GO:0007616	long-term memory	6	0	0.11	1
GO:0007617	mating behavior	5	0	0.09	1
GO:0007619	courtship behavior	3	0	0.05	1
GO:0007622	rhythmic behavior	10	0	0.18	1
GO:0007626	locomotory behavior	24	0	0.42	1
GO:0007628	adult walking behavior	3	0	0.05	1
GO:0007629	flight behavior	1	0	0.02	1
GO:0007631	feeding behavior	8	0	0.14	1
GO:0007632	visual behavior	3	0	0.05	1
GO:0007634	optokinetic behavior	1	0	0.02	1
GO:0007635	chemosensory behavior	4	0	0.07	1
GO:0007637	proboscis extension reflex	1	0	0.02	1
GO:0007638	mechanosensory behavior	4	0	0.07	1
GO:0008015	blood circulation	42	0	0.74	1
GO:0008016	regulation of heart contraction	17	0	0.3	1
GO:0008037	cell recognition	21	0	0.37	1
GO:0008038	neuron recognition	8	0	0.14	1
GO:0008039	synaptic target recognition	1	0	0.02	1
GO:0008045	motor neuron axon guidance	6	0	0.11	1
GO:0008052	sensory organ boundary specification	1	0	0.02	1
GO:0008053	mitochondrial fusion	2	0	0.04	1
GO:0008055	ocellus pigment biosynthetic process	1	0	0.02	1
GO:0008057	eye pigment granule organization	1	0	0.02	1
GO:0008063	Toll signaling pathway	2	0	0.04	1
GO:0008064	regulation of actin polymerization or de...	9	0	0.16	1
GO:0008078	mesodermal cell migration	2	0	0.04	1
GO:0008088	axo-dendritic transport	8	0	0.14	1
GO:0008089	anterograde axonal transport	3	0	0.05	1
GO:0008090	retrograde axonal transport	3	0	0.05	1
GO:0008103	oocyte microtubule cytoskeleton polariza...	2	0	0.04	1
GO:0008154	actin polymerization or depolymerization	14	0	0.25	1
GO:0008203	cholesterol metabolic process	16	0	0.28	1
GO:0008206	bile acid metabolic process	1	0	0.02	1
GO:0008207	C21-steroid hormone metabolic process	6	0	0.11	1
GO:0008209	androgen metabolic process	2	0	0.04	1
GO:0008211	glucocorticoid metabolic process	4	0	0.07	1
GO:0008213	protein alkylation	12	0	0.21	1
GO:0008214	protein dealkylation	3	0	0.05	1
GO:0008217	regulation of blood pressure	10	0	0.18	1
GO:0008218	bioluminescence	2	0	0.04	1
GO:0008228	opsonization	1	0	0.02	1
GO:0008258	head involution	1	0	0.02	1
GO:0008272	sulfate transport	1	0	0.02	1
GO:0008277	regulation of G protein-coupled receptor...	4	0	0.07	1
GO:0008284	positive regulation of cell population p...	65	0	1.14	1
GO:0008286	insulin receptor signaling pathway	5	0	0.09	1
GO:0008291	acetylcholine metabolic process	2	0	0.04	1
GO:0008298	intracellular mRNA localization	3	0	0.05	1
[truncated: 6,077 more rows]

## Sheet: Set 9
GO.ID	Term	Annotated	Significant	Expected	weightFisher
GO:0035999	tetrahydrofolate interconversion	1	0	0.03	0.0065
GO:0006361	transcription initiation from RNA polyme...	1	0	0.03	0.0065
GO:0006363	termination of RNA polymerase I transcri...	1	0	0.03	0.0065
GO:0033189	response to vitamin A	1	0	0.03	0.0065
GO:0035815	positive regulation of renal sodium excr...	1	0	0.03	0.0065
GO:0006231	dTMP biosynthetic process	1	0	0.03	0.0065
GO:0006235	dTTP biosynthetic process	1	0	0.03	0.0065
GO:0019860	uracil metabolic process	1	0	0.03	0.0065
GO:0097688	glutamate receptor clustering	1	0	0.03	0.0065
GO:0019310	inositol catabolic process	1	0	0.03	0.0065
GO:0006000	fructose metabolic process	1	0	0.03	0.0065
GO:0006003	fructose 2,6-bisphosphate metabolic proc...	1	0	0.03	0.0065
GO:0060574	intestinal epithelial cell maturation	1	0	0.03	0.0065
GO:0046340	diacylglycerol catabolic process	1	0	0.03	0.0065
GO:0044805	late nucleophagy	2	0	0.06	0.0129
GO:0046485	ether lipid metabolic process	2	1	0.06	0.0129
GO:0006844	acyl carnitine transport	2	0	0.06	0.0129
GO:0051593	response to folic acid	2	0	0.06	0.0129
GO:0019433	triglyceride catabolic process	3	0	0.08	0.0193
GO:0035810	positive regulation of urine volume	3	0	0.08	0.0193
GO:0034497	protein localization to phagophore assem...	3	0	0.08	0.0193
GO:0097421	liver regeneration	3	0	0.08	0.0193
GO:0043114	regulation of vascular permeability	4	0	0.11	0.0256
GO:0019048	modulation by virus of host process	4	0	0.11	0.0256
GO:0060012	synaptic transmission, glycinergic	5	0	0.14	0.0319
GO:0032570	response to progesterone	5	0	0.14	0.0319
GO:0007589	body fluid secretion	5	0	0.14	0.0319
GO:0048662	negative regulation of smooth muscle cel...	6	0	0.17	0.0382
GO:1903779	regulation of cardiac conduction	6	0	0.17	0.0382
GO:2000300	regulation of synaptic vesicle exocytosi...	6	0	0.17	0.0382
GO:0010753	positive regulation of cGMP-mediated sig...	6	0	0.17	0.0382
GO:0071361	cellular response to ethanol	7	1	0.2	0.0445
GO:0007168	receptor guanylyl cyclase signaling path...	7	0	0.2	0.0445
GO:0051216	cartilage development	7	0	0.2	0.0445
GO:0051384	response to glucocorticoid	7	0	0.2	0.0445
GO:1902476	chloride transmembrane transport	7	0	0.2	0.0445
GO:0006182	cGMP biosynthetic process	7	0	0.2	0.0445
GO:0000422	autophagy of mitochondrion	7	0	0.2	0.0445
GO:0071230	cellular response to amino acid stimulus	8	0	0.23	0.0507
GO:0007568	aging	8	0	0.23	0.0507
GO:0007218	neuropeptide signaling pathway	9	0	0.25	0.0568
GO:0042417	dopamine metabolic process	9	0	0.25	0.0568
GO:0097746	blood vessel diameter maintenance	9	0	0.25	0.0568
GO:0007586	digestion	9	0	0.25	0.0568
GO:0016525	negative regulation of angiogenesis	10	0	0.28	0.0629
GO:0008217	regulation of blood pressure	10	0	0.28	0.0629
GO:0036065	fucosylation	12	0	0.34	0.0751
GO:0030308	negative regulation of cell growth	12	0	0.34	0.0751
GO:0051260	protein homooligomerization	15	1	0.42	0.093
GO:0008203	cholesterol metabolic process	16	1	0.45	0.0989
GO:0017148	negative regulation of translation	18	0	0.51	0.1106
GO:0071294	cellular response to zinc ion	18	0	0.51	0.1106
GO:0045471	response to ethanol	28	1	0.79	0.1197
GO:0009636	response to toxic substance	20	1	0.56	0.1222
GO:0006865	amino acid transport	21	1	0.59	0.1279
GO:0007623	circadian rhythm	22	1	0.62	0.1336
GO:0032259	methylation	31	1	0.87	0.1833
GO:0007264	small GTPase mediated signal transductio...	35	0	0.99	0.2046
GO:0015074	DNA integration	150	1	4.23	0.2525
GO:0034097	response to cytokine	50	1	1.41	0.2797
GO:0042391	regulation of membrane potential	57	1	1.61	0.3125
GO:0006486	protein glycosylation	71	1	2	0.3739
GO:0048589	developmental growth	72	1	2.03	0.3781
GO:0007275	multicellular organism development	518	19	14.59	0.4191
GO:0050877	nervous system process	96	2	2.7	0.4711

[truncated: 1 more sheets: Set 10]
